# Supplementary material for: Estrogen Regulation of mTOR Signaling and Mitochondrial Function in Invasive Lobular Carcinoma Cell Lines Requires WNT4
Source: Cancers (Basel). 2020 Oct 12;12(10):2931. doi: 10.3390/cancers12102931 (PMC7650584; doi:10.3390/cancers12102931)
Supplement: Supplementary file 1 [file cancers-12-02931-s001.zip]

Archive with 7 entries (7 files):
- Supplemental Document 1 - FOXM1.pdf
- Supplemental Document 2 - RPPA QC information.pdf
- Supplemental Document 3 - Expanded Imunoblots.pdf
- Supplemental Figures 1-6 (revision).pdf
- Supplemental File 1 - RPPA data.xlsx
- Supplemental Table 1 - TCGA RPPA WNT4 assoc.xlsx
- Supplemental Table 2 - RPPA antibodies.xlsx
