# Supplementary material for: Estrogen Regulation of mTOR Signaling and Mitochondrial Function in Invasive Lobular Carcinoma Cell Lines Requires WNT4
Source: Cancers (Basel). 2020 Oct 12;12(10):2931. doi: 10.3390/cancers12102931 (PMC7650584; doi:10.3390/cancers12102931)
Supplement: Supplementary file 1 [file cancers-12-02931-s001.zip › Supplemental Figures 1-6 (revision).pdf]

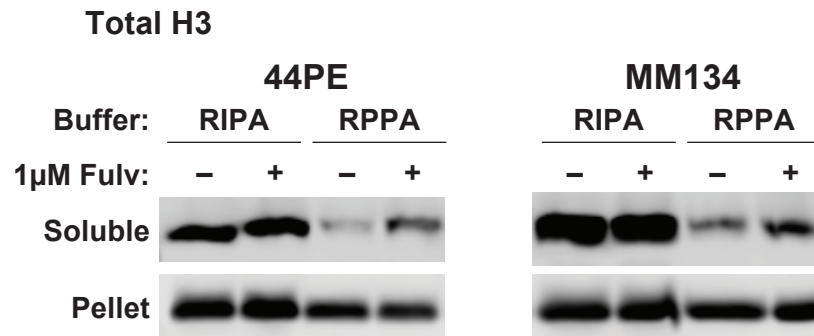

**Supplemental Figure 1. The decrease in soluble Histone H3 upon estrogen treatment is a subset of total H3 protein.** RPPA analyses in Figure 1 showed that estrogen treatment suppressed total histone H3. To examine this further, we used the reciprocal approach, inhibiting ER with Fulvestrant for 24hrs. Cells lysed with RPPA buffer (lacking SDS) showed the expected increase in H3 upon ER inhibition, but this was not observed in cells lysed with RIPA buffer (containing SDS).

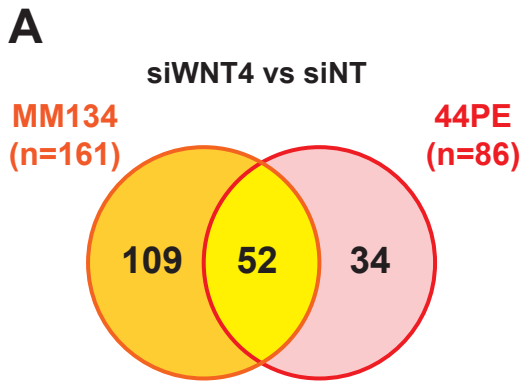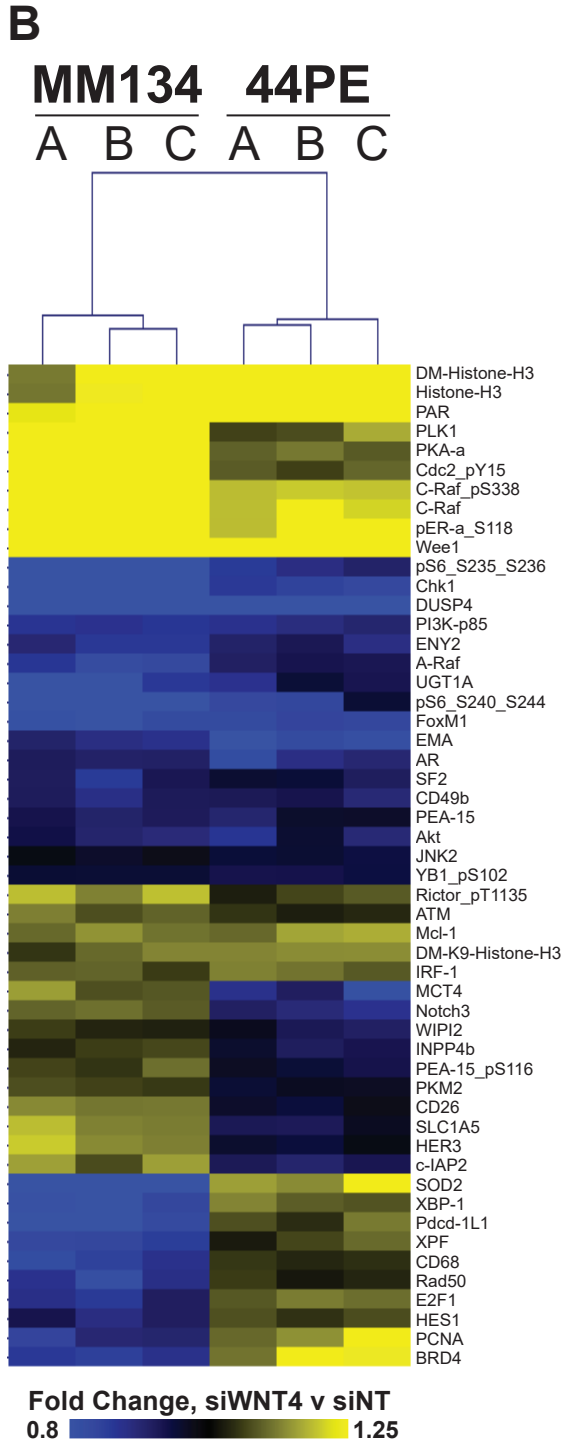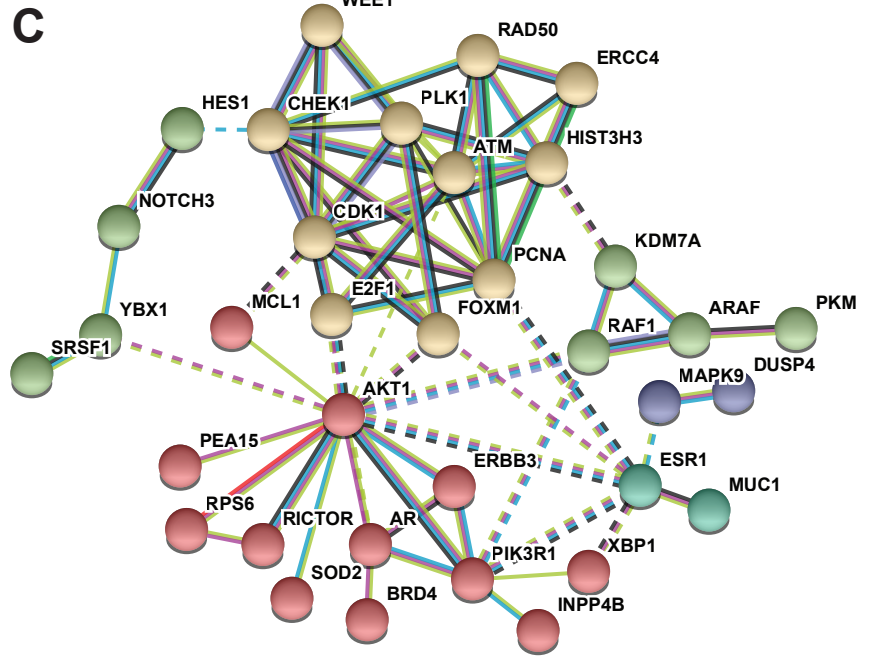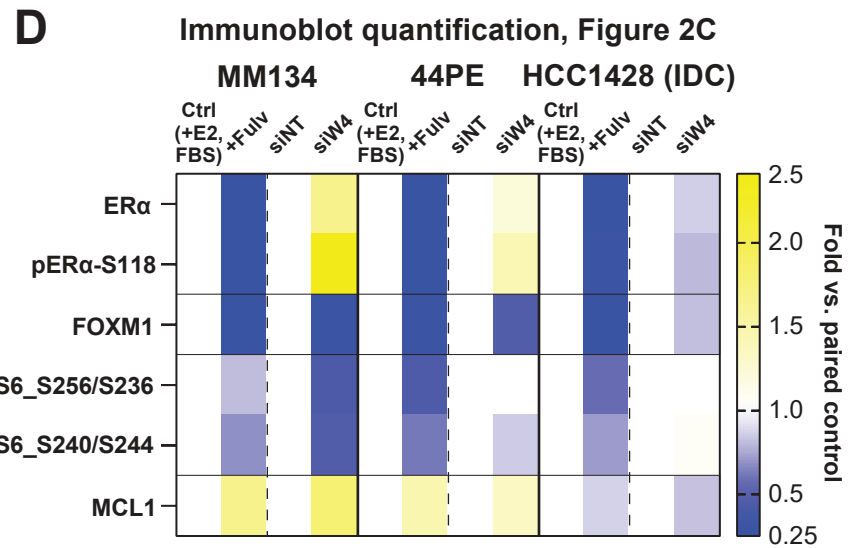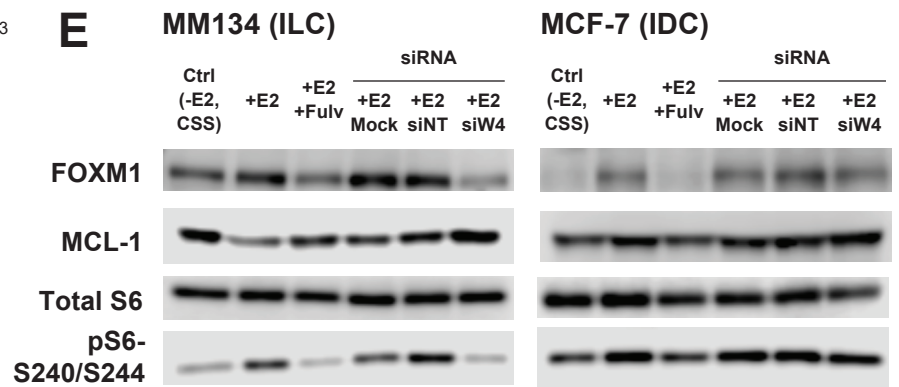

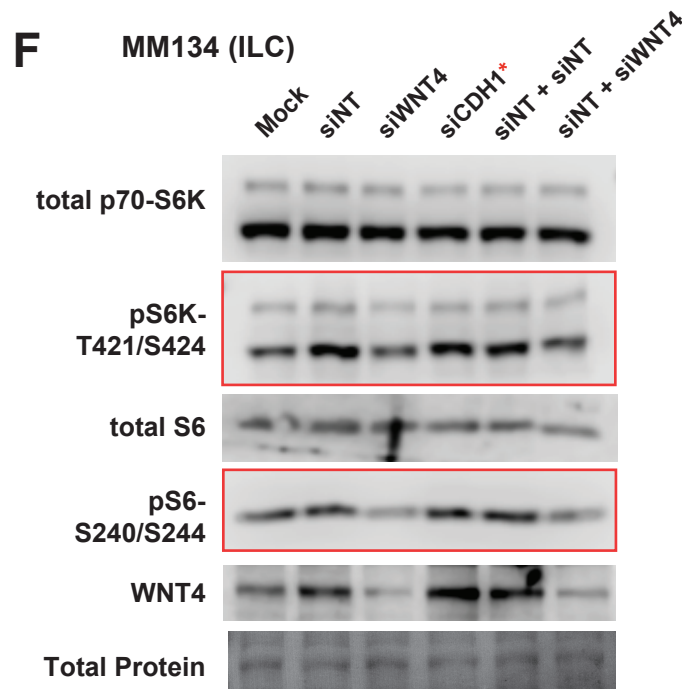

**Supplemental Figure 2. WNT4 knockdown in ILC cells dysregulates cell proliferation and PI3K-mTOR networks.** (A), Cells were hormone-deprived prior to siRNA reverse transfection and subsequent treatment with 100pM E2 for 24hrs (biological triplicate; see Materials and Methods). RPPA protein signaling changes for siWNT4+E2 versus siNT+E2 shown ( $p < 0.05$ ). (B), Heatmap for shared targets, siWNT4 vs siNT. A/B/C represent biological replicate samples. (C), STRING network analysis of WNT4 targets shared in 44PE and MM134 ( $n=52$ ). Related clusters identified in STRING by MCL clustering are indicated by colored circles, including a PI3K-mTOR cluster (red) and a cell cycle progression/checkpoint cluster (tan). (D), Quantification of immunoblot data in Figure 2C versus total protein. (E), MM134 or MCF-7 were hormone-deprived prior to drug treatment and/or siRNA transfection as indicated (i.e. as performed for RPPA studies). (F), MM134 cells in full serum were reverse transfected with the indicated siRNA for 72hrs. siCDH1 (targeting E-cadherin) was used as an additional “non-targeting” construct, since ILC cells are negative for E-cadherin protein. The red boxes highlight where both siNT and siCDH1 increase mTOR target phosphorylation, indicating a class effect of siRNAs. Combining siWNT4 with siNT blocked NT-driven signaling changes (equivalent total siRNA transfected; 2x siNT vs siNT + siWNT4) This confirms that WNT4 knockdown suppresses mTOR signaling targets and is unlikely an artifact of the NT effect. Total protein detected with Ponceau staining.

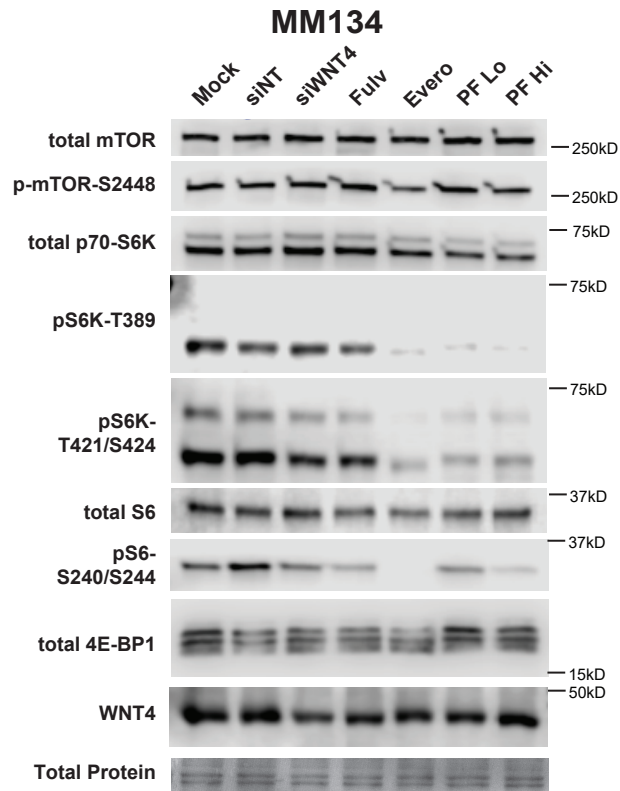

**Supplemental Figure 3. WNT4 regulates S6K activity via T421/S424 phosphorylation.** MM134 cells in full serum were transfected with siRNA or treated with inhibitors Fulvestrant (Fulv, 100nM), Everolimus (Evero, 10nM, or PF-4708671 (PF, 10 $\mu$ M or 30 $\mu$ M). Cells were harvested 72hrs post-transfection or -treatment, and immunoblotting was performed for mTOR signaling targets as indicated. Ponceau staining shown as total protein loading control.

**A**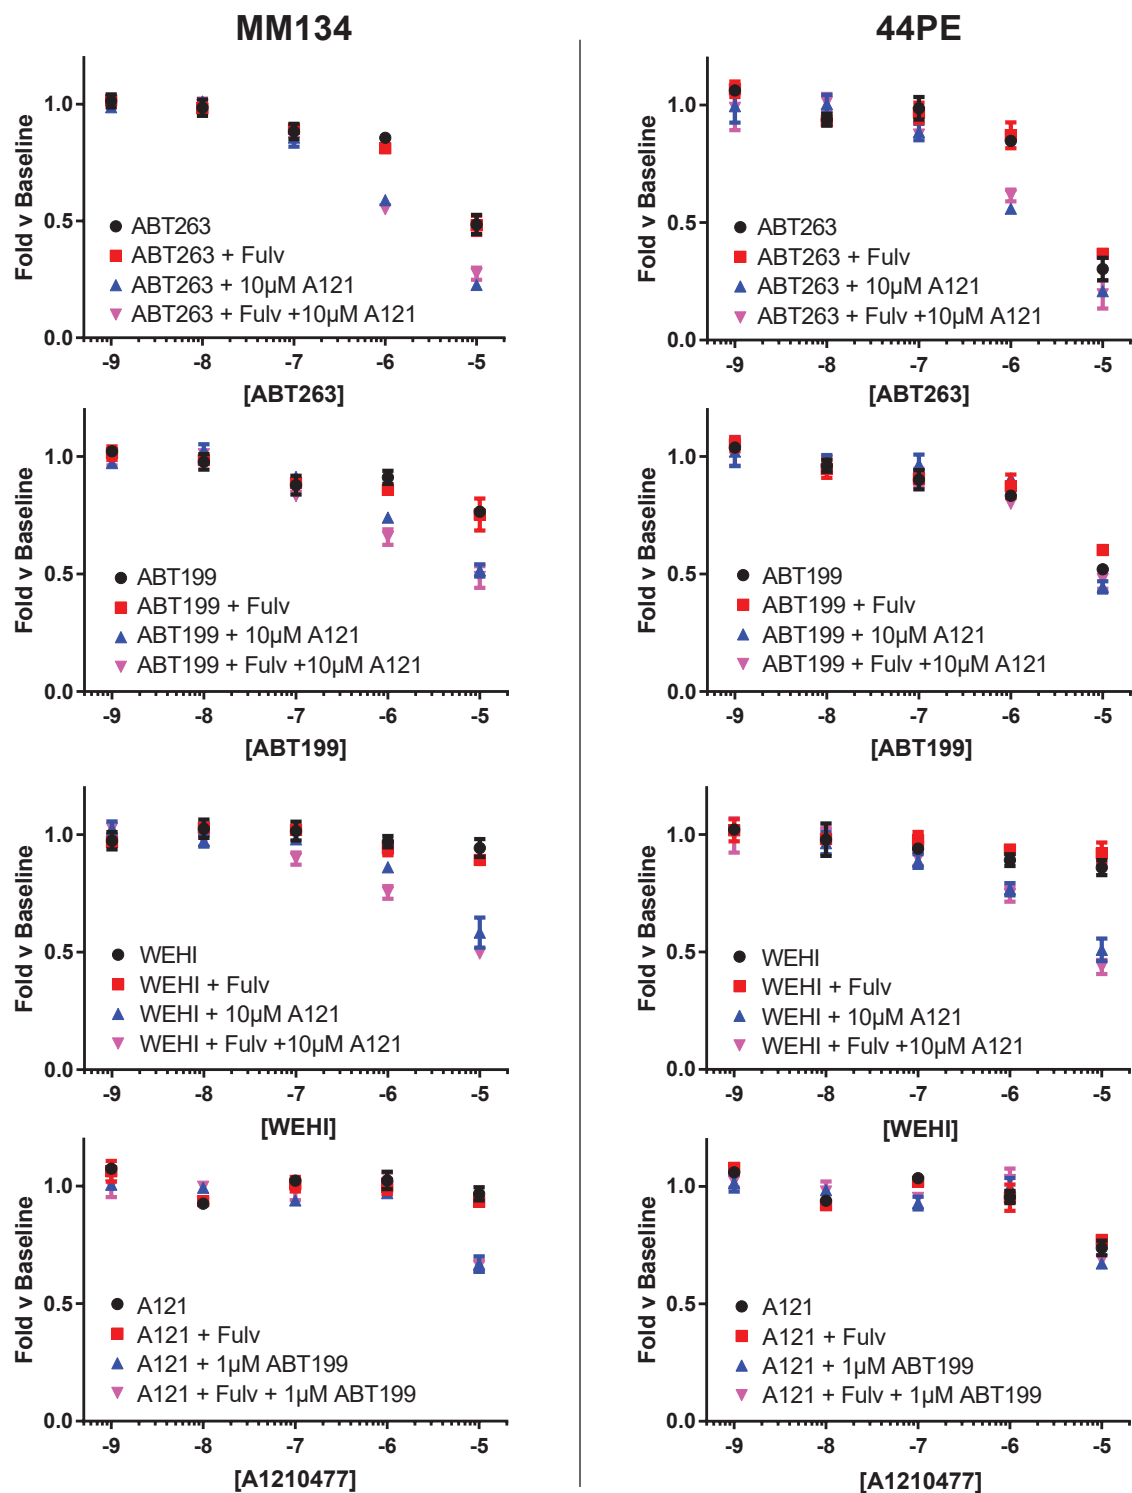**B**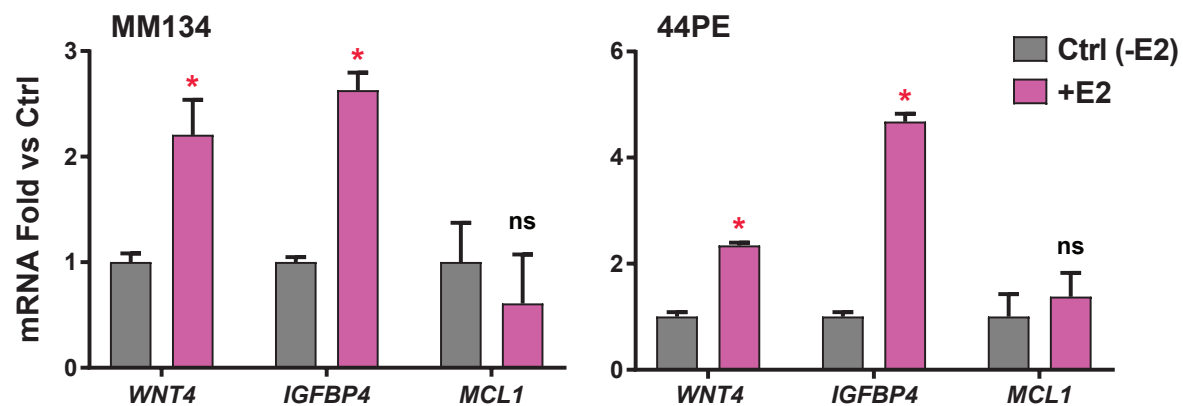

**Supplemental Figure 4. ER regulation of MCL-1 is not linked to shifts in sensitivity to BH3 mimetic drugs.** (A), Cells in full serum were pre-treated with 100nM Fulvestrant and/or base BH3 mimetic (ie. the compound at static concentration per assay) for 6hrs prior to treatment with increasing concentrations of the test BH3 mimetic. Cell proliferation/death was assessed by dsDNA quantification 72hrs after second treatment. Points represent mean of biological triplicate  $\pm$ SD. (B), mRNA expression of *MCL1* and ER target genes *WNT4* and *IGFBP4*. Cells were hormone-deprived prior to siRNA reverse transfection and subsequent treatment with 100pM E2 for 24hrs. Expression was normalized to *RPLP0*. \*, Ctrl vs +E2,  $p < 0.05$ , Student's T-test.

A

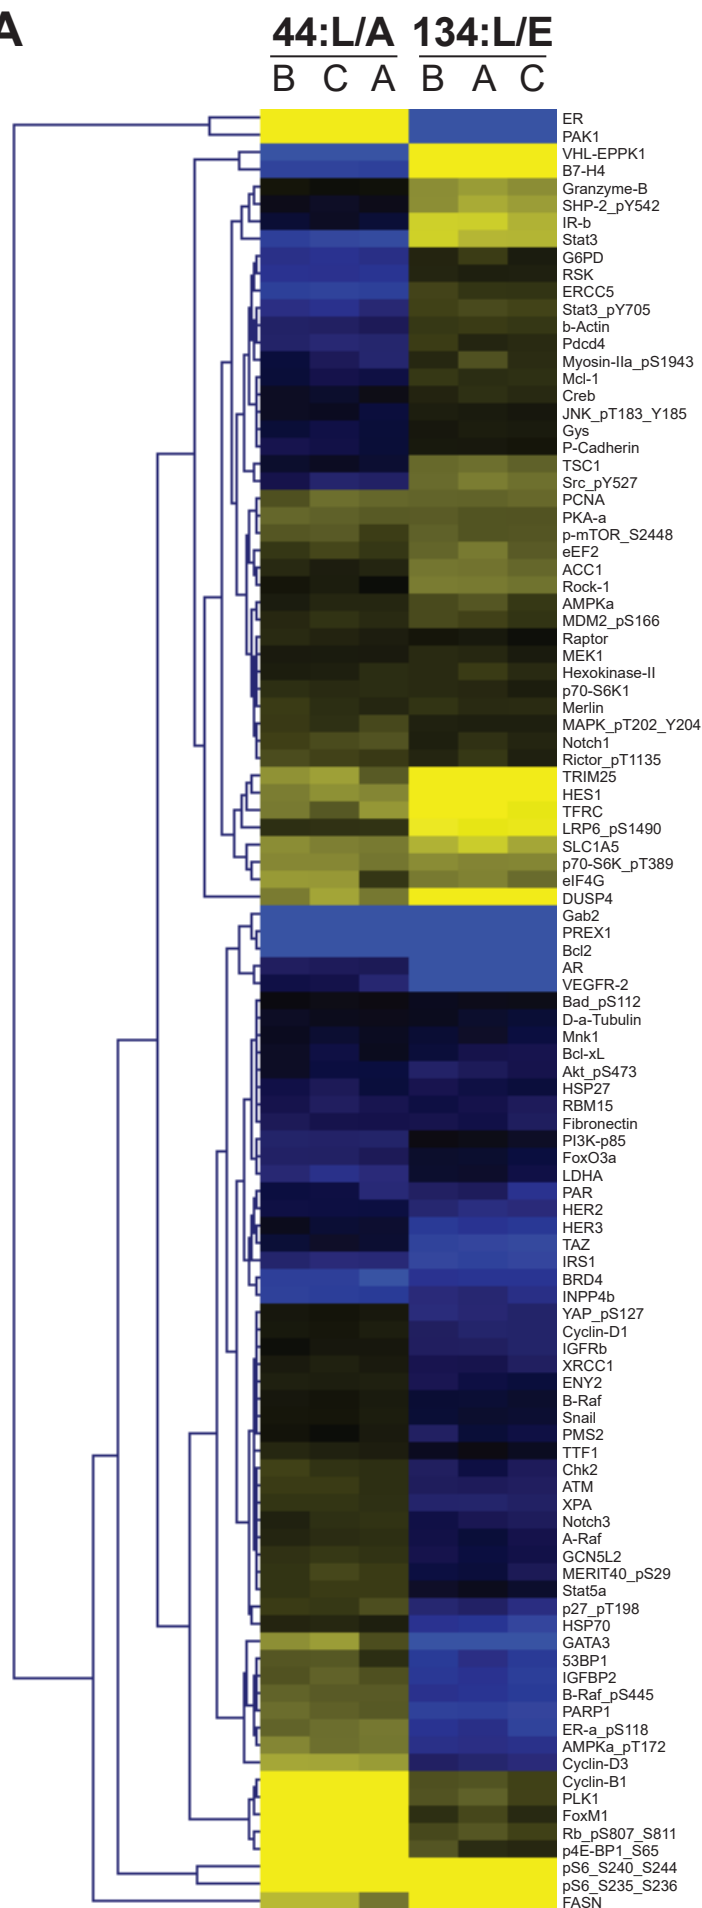

B

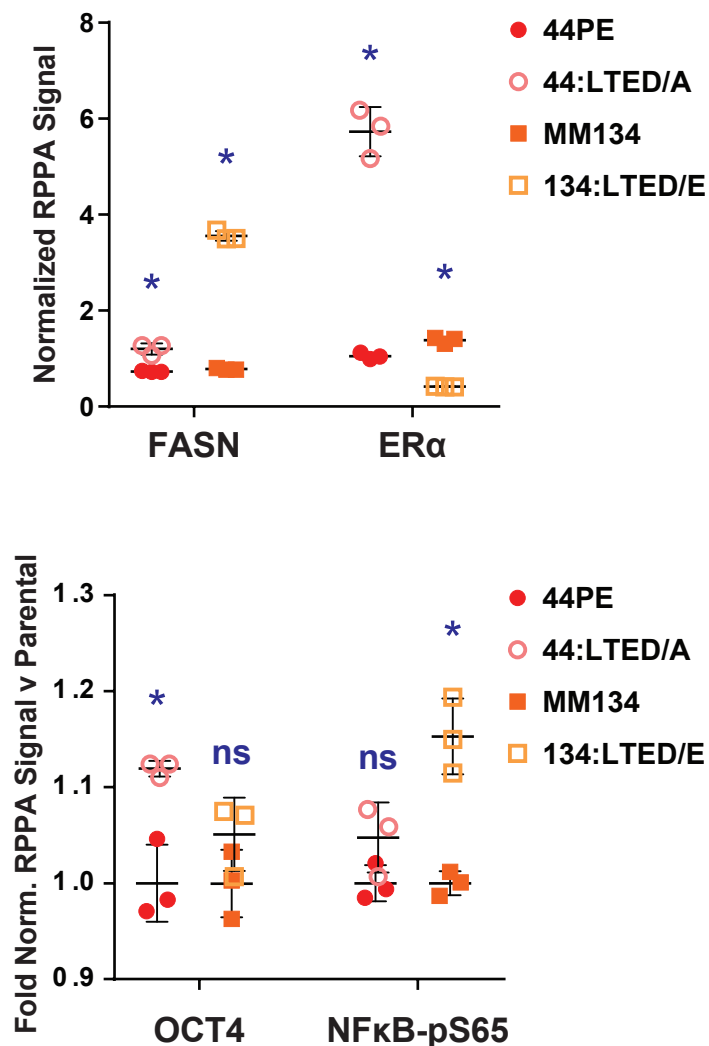

Fold Change, LTED v Parental

2.0

0.5

**Supplemental Figure 5. RPPA identifies diverse signaling pathways activated during anti-estrogen resistance in ILC models.** (A), Heatmap for n=104 shared protein signaling changes for LTED versus parental cells. A/B/C represent biological replicate samples. (B), Protein changes in LTED models that support previously described features of the anti-estrogen resistance phenotype in these models. Points represent individual biological replicates. \*, Matched parental v LTED,  $q < 0.05$ .

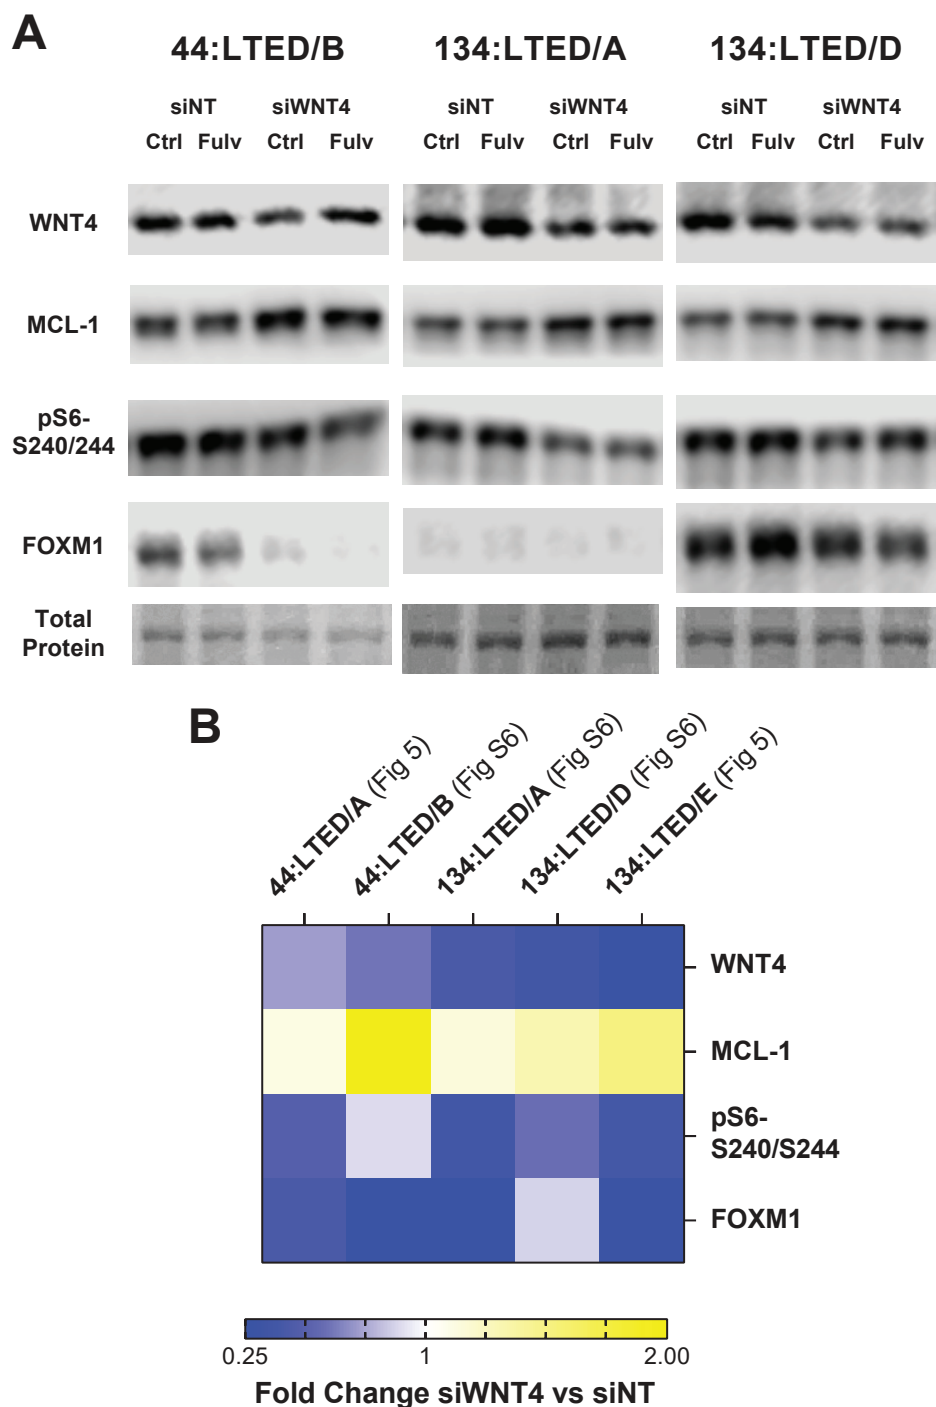

**Supplemental Figure 6. WNT4 regulation of key targets is consistent across ILC:LTED cell lines.**

(A), LTED cells (in hormone-deprivation) were reverse transfected with the indicated siRNA. 24hrs later, cells were treated with 1 $\mu$ M Fulvestrant or vehicle, and lysates were harvested after an additional 24hrs. Total protein detected with Ponceau staining. (B), Quantification (normalized to total protein) for siWNT4 vs siNT for LTED blots in Figure 5 and Supplemental Figure 6A.
