# Supplementary material for: Estrogen Regulation of mTOR Signaling and Mitochondrial Function in Invasive Lobular Carcinoma Cell Lines Requires WNT4
Source: Cancers (Basel). 2020 Oct 12;12(10):2931. doi: 10.3390/cancers12102931 (PMC7650584; doi:10.3390/cancers12102931)
Supplement: Supplementary file 1 [file cancers-12-02931-s001.zip › Supplemental File 1 - RPPA data.xlsx]

## Sheet: RawLog2
								Antibody Name	14-3-3-beta	14-3-3-epsilon	14-3-3-zeta	4E-BP1	4E-BP1_pS65	53BP1	A-Raf	ACC1	ACC_pS79	ADAR1	Akt	Akt_pS473	Akt_pT308	AMPK-a2_pS345	AMPKa	AMPKa_pT172	Annexin-I	Annexin-VII	AR	ARID1A	Atg3	Atg7	ATM	ATM_pS1981	ATRX	ATR_pS428	Aurora-B	Axl	b-Actin	b-Catenin	b-Catenin_pT41_S45	B-Raf	B-Raf_pS445	B7-H4	Bad_pS112	Bak	BAP1	Bax	Bcl-xL	Bcl2	Bcl2A1
								Antibody Origin	R	M	R	R	R	R	R	R	R	M	R	R	R	R	R	R	M	M	R	R	R	R	R	R	R	R	R	R	R	R	R	R	R	R	R	R	M	R	R	M	R
								Gene Name	YWHAB	YWHAE	YWHAZ	EIF4EBP1	EIF4EBP1	TP53BP1	ARAF	ACACA	ACACA	ADAR	AKT1	AKT1	AKT1	PRKAA2	PRKAA1	PRKAA1	ANXA1	ANXA7	AR	ARID1A	ATG3	ATG7	ATM	ATM	ATRX	ATR	AIM1	AXL	ACTB	CTNNB1	CTNNB1	BRAF	BRAF	VTCN1	BAD	BAK1	BAP1	BAX	BCL2L1	BCL2	BCL2A1
								Validation Status	V	C	V	V	V	V	V	C	V	V	V	V	V	V	C	C	V	V	V	C	V	V	V	V	C	C	V	V	C	V	V	V	V	C	V	C	V	V	V	V	V
								Slide Id	GBL1097167	GBL1097218	GBL1097168	GBL1127627	GBL1127628	GBL1127723	GBL1097083	GBL1127630	GBL1127629	GBL1097197	GBL1127744	GBL1127653	GBL1096764	GBL1097105	GBL1127631	GBL1127632	GBL1097200	GBL1097196	GBL1127703	GBL1097118	GBL1097126	GBL1097127	GBL1097107	GBL1097108	GBL1097123	GBL1097150	GBL1097115	GBL1097095	GBL1096769	GBL1127636	GBL1096770	GBL1127640	GBL1127641	GBL1097145	GBL1127633	GBL1127634	GBL1096773	GBL1127635	GBL1127637	GBL1097211	GBL1097097
								Antibody Name in Heatmap	14-3-3-beta-R-V	14-3-3-epsilon-M-C	14-3-3-zeta-R-V	4E-BP1-R-V	4E-BP1_pS65-R-V	53BP1-R-V	A-Raf-R-V	ACC1-R-C	ACC_pS79-R-V	ADAR1-M-V	Akt-R-V	Akt_pS473-R-V	Akt_pT308-R-V	AMPK-a2_pS345-R-V	AMPKa-R-C	AMPKa_pT172-R-C	Annexin-I-M-V	Annexin-VII-M-V	AR-R-V	ARID1A-R-C	Atg3-R-V	Atg7-R-V	ATM-R-V	ATM_pS1981-R-V	ATRX-R-C	ATR_pS428-R-C	Aurora-B-R-V	Axl-R-V	b-Actin-R-C	b-Catenin-R-V	b-Catenin_pT41_S45-R-V	B-Raf-R-V	B-Raf_pS445-R-V	B7-H4-R-C	Bad_pS112-R-V	Bak-R-C	BAP1-M-V	Bax-R-V	Bcl-xL-R-V	Bcl2-M-V	Bcl2A1-R-V
								Probabilities (QC Score)	0.941227	0.874559	0.915085	0.952785	0.94976	0.949028	0.953359	0.95636	0.942759	0.930905	0.93997	0.938374	0.91691	0.898949	0.952592	0.947203	0.919867	0.876725	0.922823	0.954081	0.932384	0.946005	0.948108	0.914733	0.94277	0.914961	0.938313	0.94511	0.89267	0.935404	0.929661	0.911703	0.947036	0.882249	0.944329	0.917993	0.896735	0.940768	0.950311	0.836327	0.936572
								Slide no.	1	2	3	4	5	6	7	8	9	10	11	12	13	14	15	16	17	18	19	20	21	22	23	24	25	26	27	28	29	30	31	32	33	34	35	36	37	38	39	40	41
Order	Sample Source	Category_1	Category_2	Category_3	Sample	Sample Name	Sample description	Sample Type	14-3-3-beta-R-V	14-3-3-epsilon-M-C	14-3-3-zeta-R-V	4E-BP1-R-V	4E-BP1_pS65-R-V	53BP1-R-V	A-Raf-R-V	ACC1-R-C	ACC_pS79-R-V	ADAR1-M-V	Akt-R-V	Akt_pS473-R-V	Akt_pT308-R-V	AMPK-a2_pS345-R-V	AMPKa-R-C	AMPKa_pT172-R-C	Annexin-I-M-V	Annexin-VII-M-V	AR-R-V	ARID1A-R-C	Atg3-R-V	Atg7-R-V	ATM-R-V	ATM_pS1981-R-V	ATRX-R-C	ATR_pS428-R-C	Aurora-B-R-V	Axl-R-V	b-Actin-R-C	b-Catenin-R-V	b-Catenin_pT41_S45-R-V	B-Raf-R-V	B-Raf_pS445-R-V	B7-H4-R-C	Bad_pS112-R-V	Bak-R-C	BAP1-M-V	Bax-R-V	Bcl-xL-R-V	Bcl2-M-V	Bcl2A1-R-V
									RawLog2	RawLog2	RawLog2	RawLog2	RawLog2	RawLog2	RawLog2	RawLog2	RawLog2	RawLog2	RawLog2	RawLog2	RawLog2	RawLog2	RawLog2	RawLog2	RawLog2	RawLog2	RawLog2	RawLog2	RawLog2	RawLog2	RawLog2	RawLog2	RawLog2	RawLog2	RawLog2	RawLog2	RawLog2	RawLog2	RawLog2	RawLog2	RawLog2	RawLog2	RawLog2	RawLog2	RawLog2	RawLog2	RawLog2	RawLog2	RawLog2
912	Steffi Oesterreich (Matthew Sikora)	02_Steffi_Oesterreich__Matthew_Sikora_			sample	Steffi_ Oesterreich__Matthew_Sikora_1	MCF7_Ctrl_A	Human Cell Line	-0.943664	-1.53012	0.258186	-0.732476	-0.063562	-0.374595	0.0598656	0.71027	-1.80597	-0.335415	2.13224	-0.813197	-2.05754	-2.06765	-0.751677	-0.120162	-3.15494	-2.24606	0.0161916	0.752913	-2.56369	-0.141838	-1.12452	-2.13815	-1.47953	-2.03218	-2.02648	-4.47872	-1.19359	-0.405669	-1.42087	-2.31743	-0.381704	-1.64475	-1.00688	-2.00151	-1.44491	-0.900267	-0.674715	-2.5516	-0.986147
930	Steffi Oesterreich (Matthew Sikora)	02_Steffi_Oesterreich__Matthew_Sikora_			sample	Steffi_ Oesterreich__Matthew_Sikora_2	MCF7_Ctrl_B	Human Cell Line	-0.705086	-1.80192	0.299424	-0.64717	-0.0383638	-0.362331	0.164896	0.758952	-1.81549	-0.790922	2.19609	-0.711825	-2.01395	-2.01831	-0.72917	-0.138085	-3.39969	-2.43201	0.156183	0.844957	-2.47961	-0.157025	-1.17994	-2.0013	-1.51869	-1.92954	-1.82336	-4.54446	-1.02278	-0.456507	-1.39675	-2.33077	-0.335849	-1.47205	-0.893263	-2.02631	-1.99384	-0.861437	-0.703882	-2.90037	-0.926627
931	Steffi Oesterreich (Matthew Sikora)	02_Steffi_Oesterreich__Matthew_Sikora_			sample	Steffi_ Oesterreich__Matthew_Sikora_3	MCF7_Ctrl_C	Human Cell Line	-0.829295	-1.78542	0.263424	-0.59458	0.00486569	-0.274685	0.279449	0.827374	-1.67614	-0.726813	2.25436	-0.642072	-1.86723	-1.92567	-0.597726	-0.0856379	-3.38376	-2.37691	0.188735	0.912952	-2.43675	-0.0976693	-1.1037	-1.85966	-1.46963	-1.88534	-1.74229	-4.59923	-0.95605	-0.304911	-1.31765	-2.25165	-0.283659	-1.46701	-0.802879	-1.91021	-1.93408	-0.807105	-0.644	-2.88217	-0.894984
932	Steffi Oesterreich (Matthew Sikora)	02_Steffi_Oesterreich__Matthew_Sikora_			sample	Steffi_ Oesterreich__Matthew_Sikora_4	MCF7_E2_A	Human Cell Line	-0.87827	-1.76253	0.250859	-0.585374	0.153919	-0.198146	0.204557	0.697236	-1.80728	-0.694073	2.16974	-0.117608	-1.44894	-1.8242	-0.653221	-0.0353543	-3.34965	-2.35177	0.364734	0.986447	-2.44445	-0.108215	-1.04259	-1.86716	-1.48125	-1.7982	-1.35378	-4.72716	-1.02536	-0.141341	-1.2933	-2.20809	-0.295767	-1.97973	-0.756596	-1.87175	-1.90614	-0.836765	-0.769026	-2.51085	-0.914372
933	Steffi Oesterreich (Matthew Sikora)	02_Steffi_Oesterreich__Matthew_Sikora_			sample	Steffi_ Oesterreich__Matthew_Sikora_5	MCF7_E2_B	Human Cell Line	-0.904554	-1.72286	0.241473	-0.568146	0.0702509	-0.251284	0.187894	0.677801	-1.86334	-0.623103	2.07925	-0.237	-1.43789	-1.83968	-0.676453	-0.0438673	-3.09246	-2.2455	0.350632	0.953421	-2.41234	-0.119737	-0.967473	-1.88061	-1.37936	-1.79911	-1.28571	-4.87915	-1.01024	-0.217974	-1.29508	-2.12844	-0.29424	-2.02189	-0.800805	-1.92495	-1.84738	-0.840459	-0.693686	-2.30783	-0.848018
934	Steffi Oesterreich (Matthew Sikora)	02_Steffi_Oesterreich__Matthew_Sikora_			sample	Steffi_ Oesterreich__Matthew_Sikora_6	MCF7_E2_C	Human Cell Line	-0.954059	-1.77873	0.129129	-0.677889	-0.00620416	-0.346023	-0.0228921	0.607677	-2.031	-0.665511	1.99255	-0.393943	-1.71214	-2.04646	-0.808112	-0.19948	-3.15482	-2.3699	0.161561	0.807199	-2.57557	-0.187691	-1.16038	-2.02956	-1.55297	-1.99868	-1.47558	-4.64411	-1.18193	-0.4262	-1.44411	-2.29266	-0.401292	-2.19169	-0.931973	-2.03392	-1.88857	-0.952871	-0.836989	-2.41602	-0.879236
935	Steffi Oesterreich (Matthew Sikora)	02_Steffi_Oesterreich__Matthew_Sikora_			sample	Steffi_ Oesterreich__Matthew_Sikora_7	MM134_Ctrl_A	Human Cell Line	-0.64007	-1.63596	0.00555707	2.05665	2.15931	2.01885	0.10403	0.813139	-1.10778	-0.0837499	1.2974	-3.01437	-2.77069	-1.54964	-0.308212	0.826542	-3.13079	-1.93803	1.0098	2.60379	-2.10557	-0.0924896	0.6136	-1.76704	-0.143019	-1.49566	-1.26256	-3.97819	-1.51937	-2.84281	-1.13552	-1.7529	0.938698	-3.2448	-1.07825	-1.41143	-1.18918	-0.60819	-0.451838	-1.19527	-0.860182
936	Steffi Oesterreich (Matthew Sikora)	02_Steffi_Oesterreich__Matthew_Sikora_			sample	Steffi_ Oesterreich__Matthew_Sikora_8	MM134_Ctrl_B	Human Cell Line	-0.665629	-1.65118	0.00634114	1.91731	2.12715	1.87379	0.0669056	0.799239	-1.18287	-0.00972392	1.18772	-3.08405	-2.80973	-1.67413	-0.326498	0.818159	-3.3252	-2.05835	0.880585	2.50652	-2.14465	-0.0860397	0.537227	-1.80494	-0.059464	-1.54704	-1.40809	-3.88421	-1.61209	-2.94794	-1.2154	-1.77202	0.951068	-3.12923	-1.11727	-1.45527	-1.14741	-0.637635	-0.465042	-1.25233	-0.989907
954	Steffi Oesterreich (Matthew Sikora)	02_Steffi_Oesterreich__Matthew_Sikora_			sample	Steffi_ Oesterreich__Matthew_Sikora_9	MM134_Ctrl_C	Human Cell Line	-0.597128	-1.98925	0.00896334	2.04153	2.08808	1.79449	0.0391585	0.741647	-1.2294	-0.55146	1.14777	-3.19601	-2.85583	-1.64186	-0.380274	0.799337	-3.6379	-2.19409	0.932887	2.37764	-2.11297	-0.165223	0.458712	-1.79912	-0.300919	-1.50416	-1.35064	-4.13106	-1.49924	-3.04365	-1.22959	-1.7822	0.95443	-3.07721	-1.1348	-1.60571	-1.72212	-0.671918	-0.488933	-1.48857	-0.918316
955	Steffi Oesterreich (Matthew Sikora)	02_Steffi_Oesterreich__Matthew_Sikora_			sample	Steffi_ Oesterreich__Matthew_Sikora_10	MM134_E2_A	Human Cell Line	-0.68368	-2.07893	-0.151461	1.94941	2.21192	1.70487	0.0152982	0.665781	-1.32074	-0.63805	1.00583	-3.37216	-2.85457	-1.66918	-0.501484	0.684307	-3.66534	-2.42878	0.609674	2.28636	-2.14729	-0.234267	0.383035	-1.78147	-0.351642	-1.55181	-1.34074	-4.35701	-1.42383	-3.10704	-1.29167	-1.78828	1.04264	-3.23447	-1.17478	-1.60286	-1.87017	-0.712208	-0.537116	-1.46514	-0.915065
956	Steffi Oesterreich (Matthew Sikora)	02_Steffi_Oesterreich__Matthew_Sikora_			sample	Steffi_ Oesterreich__Matthew_Sikora_11	MM134_E2_B	Human Cell Line	-0.727007	-2.05498	-0.143754	1.94718	2.14589	1.62788	-0.0385103	0.669638	-1.24571	-0.619056	1.02464	-3.41833	-2.90337	-1.64048	-0.478232	0.635066	-3.60948	-2.32745	0.685876	2.41549	-2.18413	-0.21387	0.394597	-1.856	-0.385596	-1.65038	-1.43752	-4.20085	-1.47117	-3.03025	-1.30571	-1.83269	1.07971	-3.28795	-1.19839	-1.6286	-1.80883	-0.759045	-0.588461	-1.39427	-0.96989
957	Steffi Oesterreich (Matthew Sikora)	02_Steffi_Oesterreich__Matthew_Sikora_			sample	Steffi_ Oesterreich__Matthew_Sikora_12	MM134_E2_C	Human Cell Line	-0.858744	-2.11516	-0.144129	1.74627	2.14696	1.56416	-0.158013	0.603261	-1.40454	-0.59094	0.965759	-3.3725	-2.89232	-1.82028	-0.562293	0.563856	-3.70892	-2.34738	0.489383	2.22907	-2.31555	-0.317587	0.332726	-1.92578	-0.437226	-1.76307	-1.47216	-4.33019	-1.54689	-3.14304	-1.39392	-1.88556	0.926855	-3.39166	-1.25512	-1.68374	-1.83157	-0.810399	-0.580713	-1.44828	-1.01609
958	Steffi Oesterreich (Matthew Sikora)	02_Steffi_Oesterreich__Matthew_Sikora_			sample	Steffi_ Oesterreich__Matthew_Sikora_13	MM134_E2_siSCR_A	Human Cell Line	-0.658217	-1.88551	-0.0304439	2.0139	2.22282	1.7671	0.0229195	0.764877	-1.06963	-0.318529	1.13713	-3.28908	-2.84439	-1.65594	-0.501974	0.754124	-3.45537	-2.21744	0.550498	2.34423	-2.26972	-0.166218	0.359074	-1.85508	-0.35505	-1.66751	-1.31659	-4.27682	-1.44505	-3.09307	-1.26847	-1.81701	0.976003	-3.24533	-1.13351	-1.50701	-1.53634	-0.665036	-0.480372	-1.37031	-0.995581
959	Steffi Oesterreich (Matthew Sikora)	02_Steffi_Oesterreich__Matthew_Sikora_			sample	Steffi_ Oesterreich__Matthew_Sikora_14	MM134_E2_siSCR_B	Human Cell Line	-0.730048	-1.79729	-0.0500509	2.09154	2.33734	1.87408	0.00973601	0.677182	-1.15052	-0.187968	1.2326	-3.26169	-2.83927	-1.69944	-0.501263	0.754354	-3.37828	-2.14226	0.53348	2.4422	-2.33734	-0.193858	0.292179	-1.86917	-0.382272	-1.63932	-1.34457	-4.2794	-1.44545	-3.1568	-1.29437	-1.88525	0.854979	-3.25626	-1.15005	-1.53132	-1.33957	-0.680597	-0.483646	-1.23834	-0.983166
960	Steffi Oesterreich (Matthew Sikora)	02_Steffi_Oesterreich__Matthew_Sikora_			sample	Steffi_ Oesterreich__Matthew_Sikora_15	MM134_E2_siSCR_C	Human Cell Line	-0.766564	-1.81563	-0.134247	1.93483	2.27309	1.77556	0.0312477	0.672961	-1.14925	-0.093108	1.13215	-3.30149	-2.96886	-1.85903	-0.521714	0.734886	-3.557	-2.25695	0.406934	2.39516	-2.42856	-0.179633	0.267833	-2.06208	-0.259995	-1.65081	-1.48942	-4.289	-1.63418	-3.19767	-1.32686	-1.94294	0.757004	-3.26858	-1.13418	-1.61493	-1.23013	-0.684373	-0.527356	-1.27866	-1.1093
978	Steffi Oesterreich (Matthew Sikora)	02_Steffi_Oesterreich__Matthew_Sikora_			sample	Steffi_ Oesterreich__Matthew_Sikora_16	MM134_E2_siW4_A	Human Cell Line	-0.518804	-1.94434	0.0525349	1.83071	2.1428	1.72027	-0.105807	0.824014	-1.14978	-0.499549	1.16491	-3.19513	-2.73842	-1.58544	-0.381944	0.634376	-3.46884	-2.17088	0.466808	2.07714	-2.09434	-0.147763	0.561708	-1.72559	-0.205623	-1.41498	-1.19151	-4.39874	-1.56772	-2.88644	-1.22849	-1.6646	1.17655	-3.11014	-1.10677	-1.48185	-1.65866	-0.687205	-0.474432	-1.255	-0.847046
979	Steffi Oesterreich (Matthew Sikora)	02_Steffi_Oesterreich__Matthew_Sikora_			sample	Steffi_ Oesterreich__Matthew_Sikora_17	MM134_E2_siW4_B	Human Cell Line	-0.673375	-2.09219	-0.125798	1.68402	1.99969	1.70189	-0.285879	0.700945	-1.24853	-0.608342	1.00352	-3.40839	-2.86909	-1.70188	-0.433566	0.688566	-3.57077	-2.32967	0.342233	2.10084	-2.24158	-0.269365	0.392297	-1.79941	-0.339228	-1.56992	-1.25773	-4.42974	-1.59113	-3.24712	-1.31131	-1.80699	1.12795	-3.30426	-1.14119	-1.49164	-1.85586	-0.675874	-0.582172	-1.36749	-0.908053
980	Steffi Oesterreich (Matthew Sikora)	02_Steffi_Oesterreich__Matthew_Sikora_			sample	Steffi_ Oesterreich__Matthew_Sikora_18	MM134_E2_siW4_C	Human Cell Line	-0.674048	-1.96148	-0.0915198	1.69364	1.92701	1.71061	-0.23785	0.68005	-1.32701	-0.577393	1.01562	-3.32696	-2.81232	-1.61572	-0.419555	0.555108	-3.48325	-2.26204	0.375841	2.13284	-2.20891	-0.163344	0.451096	-1.7573	-0.27728	-1.58505	-1.23469	-4.34133	-1.56936	-2.98841	-1.29394	-1.77995	1.07611	-3.20368	-1.15477	-1.47953	-1.76862	-0.698304	-0.579803	-1.33594	-0.884319
981	Steffi Oesterreich (Matthew Sikora)	02_Steffi_Oesterreich__Matthew_Sikora_			sample	Steffi_ Oesterreich__Matthew_Sikora_19	44PE_Ctrl_A	Human Cell Line	-0.752796	-1.85427	-0.153439	2.4147	1.94387	0.388332	-0.0939612	-0.0779087	-1.35282	-0.65538	1.02797	-2.80623	-2.80019	-1.58619	-0.640567	-0.242155	-2.56649	-1.64559	-0.493031	1.87352	-2.27578	0.283867	-0.465262	-1.71576	-0.355455	-1.91181	-1.37805	-4.2653	-1.12969	-2.86505	-1.20719	-1.97522	-0.132352	-2.33266	-1.20171	-1.61777	-1.56437	-1.01885	-0.553943	-1.42541	-0.88393
982	Steffi Oesterreich (Matthew Sikora)	02_Steffi_Oesterreich__Matthew_Sikora_			sample	Steffi_ Oesterreich__Matthew_Sikora_20	44PE_Ctrl_B	Human Cell Line	-0.739225	-1.80497	-0.113186	2.40215	1.80795	0.422717	-0.081713	-0.0601096	-1.4435	-0.573023	1.05092	-2.76492	-2.80033	-1.59107	-0.66424	-0.232355	-2.43519	-1.63487	-0.463371	1.82389	-2.27455	0.216862	-0.481564	-1.75081	-0.324626	-1.93658	-1.43286	-4.11021	-1.1786	-2.77246	-1.23486	-2.01795	-0.0708792	-2.27773	-1.22836	-1.62645	-1.33416	-1.03687	-0.558882	-1.35492	-0.901492
983	Steffi Oesterreich (Matthew Sikora)	02_Steffi_Oesterreich__Matthew_Sikora_			sample	Steffi_ Oesterreich__Matthew_Sikora_21	44PE_Ctrl_C	Human Cell Line	-0.765003	-1.70746	-0.105507	2.48653	1.98625	0.520176	-0.0838476	-0.0428919	-1.49522	-0.467362	1.19908	-2.77687	-2.91212	-1.63939	-0.662788	-0.206646	-2.48957	-1.53694	-0.474575	2.0525	-2.29992	0.204195	-0.479943	-1.81199	-0.325497	-1.97652	-1.49813	-4.26952	-1.22821	-2.91307	-1.23078	-2.02623	-0.186467	-2.37261	-1.2299	-1.5862	-1.18653	-1.04775	-0.538488	-1.3359	-0.930089
984	Steffi Oesterreich (Matthew Sikora)	02_Steffi_Oesterreich__Matthew_Sikora_			sample	Steffi_ Oesterreich__Matthew_Sikora_22	44PE_E2_A	Human Cell Line	-0.723677	-1.54705	-0.152807	2.69338	2.55455	0.624417	0.0553772	0.111013	-1.5444	-0.18033	1.40643	-2.71046	-2.85842	-1.57066	-0.614935	-0.0683407	-2.21861	-1.58769	0.122681	2.06508	-2.23446	0.411307	-0.255853	-1.73795	-0.113904	-1.75983	-1.22633	-4.08962	-1.25169	-2.77181	-1.14709	-1.94209	0.0421252	-2.28932	-1.15908	-1.51785	-1.0115	-0.996543	-0.466117	-1.04701	-0.930792
996	Steffi Oesterreich (Matthew Sikora)	02_Steffi_Oesterreich__Matthew_Sikora_			sample	Steffi_ Oesterreich__Matthew_Sikora_23	44PE_E2_B	Human Cell Line	-0.550882	-1.94818	-0.145201	2.55009	2.37683	0.475394	-0.0470228	-0.302157	-1.65202	-0.785674	1.23588	-2.83847	-2.6468	-1.54021	-0.778005	-0.247911	-2.43484	-1.66877	0.114459	1.84394	-2.19931	0.2325	-0.37409	-1.70326	-0.345923	-1.7512	-1.24062	-4.18384	-1.23444	-2.8216	-1.32224	-2.02395	-0.125586	-2.22053	-1.36495	-1.8863	-1.47405	-1.17422	-0.551097	-1.33919	-0.842191
997	Steffi Oesterreich (Matthew Sikora)	02_Steffi_Oesterreich__Matthew_Sikora_			sample	Steffi_ Oesterreich__Matthew_Sikora_24	44PE_E2_C	Human Cell Line	-0.665693	-2.00909	-0.248034	2.62093	2.43636	0.439342	-0.14143	-0.249673	-1.62397	-0.792589	1.12568	-2.78355	-2.91249	-1.55432	-0.716245	-0.197858	-2.53759	-1.72375	0.0320862	1.72668	-2.22976	0.181697	-0.459274	-1.74696	-0.524672	-1.75723	-1.2625	-4.30393	-1.18498	-2.97141	-1.28575	-2.01365	-0.180912	-2.41887	-1.31397	-1.6854	-1.82789	-1.04643	-0.604615	-1.45155	-0.897159
998	Steffi Oesterreich (Matthew Sikora)	02_Steffi_Oesterreich__Matthew_Sikora_			sample	Steffi_ Oesterreich__Matthew_Sikora_25	44PE_E2_siSCR_A	Human Cell Line	-0.585938	-1.88174	-0.170921	2.64853	2.62158	0.441213	-0.00152142	-0.164857	-1.40039	-0.799456	1.25589	-2.67177	-2.80477	-1.51668	-0.741097	-0.268768	-2.38888	-1.68969	0.101191	1.85988	-2.18319	0.301457	-0.499719	-1.70482	-0.41355	-1.71906	-1.21003	-4.17677	-1.10711	-2.90858	-1.28177	-2.00982	-0.0817668	-2.29931	-1.26186	-1.686	-1.47127	-1.0095	-0.494088	-1.43235	-0.904699
999	Steffi Oesterreich (Matthew Sikora)	02_Steffi_Oesterreich__Matthew_Sikora_			sample	Steffi_ Oesterreich__Matthew_Sikora_26	44PE_E2_siSCR_B	Human Cell Line	-0.619617	-1.96387	-0.222894	2.56316	2.40185	0.314369	-0.0101335	-0.209863	-1.47626	-0.776051	1.26229	-2.85687	-2.87946	-1.5992	-0.701301	-0.12705	-2.41897	-1.77844	-0.0129889	1.95496	-2.26204	0.215781	-0.532462	-1.74267	-0.459397	-1.74399	-1.23722	-4.23532	-1.10931	-3.01008	-1.30177	-2.03167	-0.149865	-2.38434	-1.26982	-1.56814	-1.67001	-1.08228	-0.639484	-1.46465	-0.949971
1000	Steffi Oesterreich (Matthew Sikora)	02_Steffi_Oesterreich__Matthew_Sikora_			sample	Steffi_ Oesterreich__Matthew_Sikora_27	44PE_E2_siSCR_C	Human Cell Line	-0.528679	-1.84178	-0.187401	2.52601	2.37533	0.444973	0.0518634	-0.18299	-1.54791	-0.68786	1.28206	-2.73722	-2.8199	-1.49397	-0.696716	-0.307283	-2.30562	-1.72659	0.0700914	2.115	-2.16822	0.260833	-0.430307	-1.67169	-0.294796	-1.7164	-1.19472	-3.9621	-1.14742	-2.88325	-1.24619	-1.95589	-0.102054	-2.219	-1.26011	-1.64608	-1.48914	-1.04864	-0.548794	-1.47128	-0.872211
1001	Steffi Oesterreich (Matthew Sikora)	02_Steffi_Oesterreich__Matthew_Sikora_			sample	Steffi_ Oesterreich__Matthew_Sikora_28	44PE_E2_siW4_A	Human Cell Line	-0.688251	-1.99419	-0.304847	2.48105	2.32219	0.290269	-0.168517	-0.337357	-1.499	-0.807866	1.00234	-2.86304	-2.94049	-1.58911	-0.727412	-0.0723473	-2.53422	-1.78528	-0.294	1.68981	-2.23719	0.197407	-0.471561	-1.73841	-0.530138	-1.80675	-1.22163	-4.3193	-1.14574	-2.97754	-1.27828	-2.02418	-0.257866	-2.50855	-1.27789	-1.73768	-1.68706	-1.04394	-0.687698	-1.47931	-0.933391
1002	Steffi Oesterreich (Matthew Sikora)	02_Steffi_Oesterreich__Matthew_Sikora_			sample	Steffi_ Oesterreich__Matthew_Sikora_29	44PE_E2_siW4_B	Human Cell Line	-0.673066	-1.96007	-0.219348	2.46462	2.31145	0.4235	-0.117721	-0.21869	-1.55379	-0.782812	1.17144	-2.81503	-2.9426	-1.63234	-0.727289	-0.0946493	-2.42751	-1.71477	-0.160009	1.88169	-2.2278	0.256289	-0.480156	-1.7851	-0.473468	-1.79687	-1.25324	-4.24307	-1.22992	-2.81274	-1.24645	-2.05975	-0.0266013	-2.44609	-1.30265	-1.77586	-1.58059	-1.11363	-0.59418	-1.40012	-0.939126
1003	Steffi Oesterreich (Matthew Sikora)	02_Steffi_Oesterreich__Matthew_Sikora_			sample	Steffi_ Oesterreich__Matthew_Sikora_30	44PE_E2_siW4_C	Human Cell Line	-0.746811	-2.01383	-0.234027	2.44157	2.39658	0.369363	-0.159138	-0.184753	-1.61504	-0.773739	1.04069	-2.95295	-3.00526	-1.58965	-0.704317	-0.10738	-2.52329	-1.79051	-0.166871	1.83084	-2.28648	0.233326	-0.501583	-1.78127	-0.472224	-1.85802	-1.24374	-4.41496	-1.17786	-3.10059	-1.30765	-2.06121	-0.0627752	-2.543	-1.33177	-1.78183	-1.68381	-1.16725	-0.692568	-1.50475	-0.933943
1004	Steffi Oesterreich (Matthew Sikora)	02_Steffi_Oesterreich__Matthew_Sikora_			sample	Steffi_ Oesterreich__Matthew_Sikora_31	134_L_E_Ctrl_A	Human Cell Line	-0.759198	-2.05415	-0.324997	1.73533	2.30911	1.34599	-0.167574	1.33078	-0.683677	-0.541876	1.13118	-3.44968	-2.86578	-1.43644	0.0303725	0.266256	-3.11042	-2.23624	-0.84183	2.26188	-2.0716	0.112222	0.178974	-1.8018	-0.593011	-1.51303	-1.48574	-4.21706	-1.2875	-2.9233	-1.29913	-1.99103	0.31855	-1.78833	-1.25355	-1.69601	-1.54958	-0.8082	-0.771136	-3.77555	-0.862546
1005	Steffi Oesterreich (Matthew Sikora)	02_Steffi_Oesterreich__Matthew_Sikora_			sample	Steffi_ Oesterreich__Matthew_Sikora_32	134_L_E_Ctrl_B	Human Cell Line	-0.967912	-2.14734	-0.314885	1.67523	2.35278	1.07297	-0.348167	1.15992	-0.812302	-0.543367	1.01801	-3.64848	-2.99138	-1.66224	-0.156476	0.107048	-3.21527	-2.39637	-1.0366	2.17036	-2.21238	-0.0838616	0.0346087	-1.95673	-0.725964	-1.71245	-1.67285	-4.60228	-1.43955	-3.20981	-1.40576	-2.12286	0.214229	-1.94791	-1.40202	-1.82244	-1.65962	-0.934448	-0.845072	-3.78042	-0.970302
1006	Steffi Oesterreich (Matthew Sikora)	02_Steffi_Oesterreich__Matthew_Sikora_			sample	Steffi_ Oesterreich__Matthew_Sikora_33	134_L_E_Ctrl_C	Human Cell Line	-0.943769	-2.03847	-0.223637	1.632	2.20618	1.1375	-0.308204	1.14282	-0.813686	-0.44115	1.07232	-3.48205	-2.88441	-1.61801	-0.184163	0.150777	-3.10014	-2.23396	-0.994235	2.09104	-2.18509	-0.0154942	0.0803748	-1.96411	-0.685032	-1.67929	-1.66953	-4.39693	-1.38897	-3.07683	-1.34076	-2.04986	0.180833	-1.89385	-1.32633	-1.78223	-1.43247	-0.909142	-0.858448	-3.61176	-1.00791
1007	Steffi Oesterreich (Matthew Sikora)	02_Steffi_Oesterreich__Matthew_Sikora_			sample	Steffi_ Oesterreich__Matthew_Sikora_34	134_L_E_siSCR_A	Human Cell Line	-0.968281	-1.91017	-0.235385	1.62754	2.27274	1.14304	-0.237386	1.11659	-0.692183	-0.321921	1.14441	-3.71829	-3.0738	-1.66807	-0.269772	0.208845	-3.15031	-2.19738	-1.12764	2.18177	-2.39032	0.0363893	-0.116767	-2.04659	-0.718081	-1.72044	-1.60739	-4.57413	-1.29205	-3.33956	-1.39195	-2.15178	0.0678581	-1.90567	-1.35414	-1.81976	-1.20398	-0.930212	-0.824869	-3.59613	-0.931119
1008	Steffi Oesterreich (Matthew Sikora)	02_Steffi_Oesterreich__Matthew_Sikora_			sample	Steffi_ Oesterreich__Matthew_Sikora_35	134_L_E_siSCR_B	Human Cell Line	-0.950974	-1.83122	-0.269106	1.67598	2.34303	1.2757	-0.144101	1.30954	-0.643224	-0.150614	1.19057	-3.58664	-3.06856	-1.67693	-0.211025	0.229463	-3.04985	-2.22931	-1.13975	2.19144	-2.33749	0.0956414	-0.0549032	-2.12298	-0.671002	-1.65426	-1.64614	-4.53088	-1.39214	-3.23943	-1.35628	-2.14558	0.153087	-1.87072	-1.34887	-1.86131	-1.11422	-0.902895	-0.795568	-3.61672	-1.07437
1019	Steffi Oesterreich (Matthew Sikora)	02_Steffi_Oesterreich__Matthew_Sikora_			sample	Steffi_ Oesterreich__Matthew_Sikora_36	134_L_E_siSCR_C	Human Cell Line	-0.819241	-2.20809	-0.39376	1.65256	2.09196	0.991148	-0.168589	1.03161	-0.680692	-0.729247	0.940325	-3.75455	-3.10419	-1.64888	-0.242047	0.200151	-3.35374	-2.35779	-1.1597	1.91695	-2.27319	-0.00165886	-0.18596	-1.95255	-0.78647	-1.57064	-1.601	-4.68532	-1.19599	-3.74684	-1.53076	-2.17721	0.114411	-1.77228	-1.4071	-1.97844	-1.67056	-1.00961	-0.91618	-4.14368	-0.973481
1020	Steffi Oesterreich (Matthew Sikora)	02_Steffi_Oesterreich__Matthew_Sikora_			sample	Steffi_ Oesterreich__Matthew_Sikora_37	134_L_E_siW4_A	Human Cell Line	-0.628622	-2.12318	-0.204886	1.64642	2.08577	0.993316	-0.480358	1.1854	-0.933774	-0.685103	1.06801	-3.62187	-2.86559	-1.56103	-0.156387	0.149503	-3.07912	-2.18861	-1.12026	1.70216	-2.0302	-0.00305813	0.0774102	-1.8751	-0.633191	-1.41416	-1.4582	-4.38261	-1.16464	-3.06011	-1.38688	-2.03855	0.333803	-1.6441	-1.3482	-1.8589	-1.41156	-0.934305	-0.849893	-4.0449	-0.887785
1021	Steffi Oesterreich (Matthew Sikora)	02_Steffi_Oesterreich__Matthew_Sikora_			sample	Steffi_ Oesterreich__Matthew_Sikora_38	134_L_E_siW4_B	Human Cell Line	-0.792976	-2.17898	-0.306041	1.66127	2.04872	0.980319	-0.506053	1.0306	-0.888235	-0.742275	0.94198	-3.61544	-2.95347	-1.60089	-0.208887	0.106688	-3.18747	-2.29165	-1.13307	1.67689	-2.14503	-0.0708601	-0.0117422	-1.92482	-0.669634	-1.46206	-1.4819	-4.70423	-1.28459	-3.46608	-1.45549	-2.07645	0.240596	-1.69799	-1.35919	-1.84853	-1.66758	-0.920653	-1.0297	-4.09031	-0.907855
1022	Steffi Oesterreich (Matthew Sikora)	02_Steffi_Oesterreich__Matthew_Sikora_			sample	Steffi_ Oesterreich__Matthew_Sikora_39	134_L_E_siW4_C	Human Cell Line	-0.567379	-2.08024	-0.226878	1.7207	2.09349	1.11175	-0.454944	1.16784	-0.836285	-0.647195	1.05604	-3.45865	-2.84717	-1.50794	-0.219468	0.108978	-3.06757	-2.13487	-1.06609	1.78649	-2.07134	0.0232038	0.15585	-1.83508	-0.596921	-1.36389	-1.44431	-4.48797	-1.18931	-3.11238	-1.35249	-2.02182	0.318454	-1.63546	-1.35555	-1.79999	-1.43457	-0.871568	-0.791527	-4.03098	-0.877914
1023	Steffi Oesterreich (Matthew Sikora)	02_Steffi_Oesterreich__Matthew_Sikora_			sample	Steffi_ Oesterreich__Matthew_Sikora_40	44_L_A_Ctrl_A	Human Cell Line	-0.518536	-1.93704	-0.0287154	3.10291	3.20049	0.761383	0.23415	-0.0878111	-1.15756	-0.572253	1.0492	-2.91712	-2.79751	-1.44948	-0.380093	0.397662	-3.15174	-1.94261	-0.690933	1.75273	-2.15253	0.104257	-0.15479	-1.62154	-0.323162	-1.54116	-0.93999	-4.19923	-1.39742	-2.75195	-1.17484	-1.79508	0.382979	-2.93971	-1.20592	-1.45802	-1.34044	-0.953879	-0.575795	-2.32789	-0.90308
1024	Steffi Oesterreich (Matthew Sikora)	02_Steffi_Oesterreich__Matthew_Sikora_			sample	Steffi_ Oesterreich__Matthew_Sikora_41	44_L_A_Ctrl_B	Human Cell Line	-0.495374	-1.99601	-0.0609255	3.13263	3.22038	0.892216	0.13537	-0.0268653	-1.18753	-0.592073	1.22959	-2.88547	-2.93525	-1.50902	-0.489261	0.407651	-3.11783	-1.89556	-0.775044	2.3563	-2.1724	0.227118	-0.149917	-1.66496	-0.38603	-1.6462	-0.972335	-4.11513	-1.5132	-2.72762	-1.24962	-1.86748	0.372031	-3.01301	-1.24152	-1.65939	-1.31748	-1.06183	-0.653005	-2.5212	-0.969126
1025	Steffi Oesterreich (Matthew Sikora)	02_Steffi_Oesterreich__Matthew_Sikora_			sample	Steffi_ Oesterreich__Matthew_Sikora_42	44_L_A_Ctrl_C	Human Cell Line	-0.411827	-1.91519	0.0660949	3.1042	3.28216	1.02715	0.301443	0.0425481	-1.12324	-0.484359	1.28781	-2.83992	-2.86114	-1.4589	-0.304131	0.445659	-3.12678	-1.84422	-0.630081	2.55063	-2.10297	0.424161	-0.0219563	-1.6292	-0.205851	-1.47378	-0.721614	-4.4433	-1.36654	-2.89817	-1.13948	-1.76133	0.464161	-2.88483	-1.14368	-1.43129	-1.3155	-0.921674	-0.62103	-2.31439	-0.883875
1026	Steffi Oesterreich (Matthew Sikora)	02_Steffi_Oesterreich__Matthew_Sikora_			sample	Steffi_ Oesterreich__Matthew_Sikora_43	44_L_A_siSCR_A	Human Cell Line	-0.535051	-1.95073	-0.0571858	2.82874	3.1385	0.786703	0.184938	-0.0408232	-1.06559	-0.568776	1.11049	-3.01304	-2.94815	-1.51435	-0.494799	0.43315	-3.16244	-1.90929	-0.625712	2.30815	-2.21067	0.254816	-0.275889	-1.68834	-0.447653	-1.55158	-0.883714	-4.38185	-1.4729	-2.90386	-1.21348	-1.86859	0.37356	-2.91713	-1.22632	-1.74115	-1.3056	-1.05099	-0.566738	-2.4561	-0.821947
1027	Steffi Oesterreich (Matthew Sikora)	02_Steffi_Oesterreich__Matthew_Sikora_			sample	Steffi_ Oesterreich__Matthew_Sikora_44	44_L_A_siSCR_B	Human Cell Line	-0.720653	-2.03412	-0.140421	2.79138	3.06311	0.741557	0.186964	-0.106275	-1.00994	-0.659713	1.0734	-3.12081	-3.00181	-1.52948	-0.462517	0.533207	-3.46504	-2.11302	-0.603047	2.3266	-2.31556	0.249937	-0.31556	-1.73422	-0.453793	-1.68733	-0.949046	-4.38007	-1.58865	-3.22157	-1.30848	-1.94329	0.425835	-3.14613	-1.19048	-1.74634	-1.44659	-1.10861	-0.656589	-2.61567	-1.00045
1028	Steffi Oesterreich (Matthew Sikora)	02_Steffi_Oesterreich__Matthew_Sikora_			sample	Steffi_ Oesterreich__Matthew_Sikora_45	44_L_A_siSCR_C	Human Cell Line	-0.760119	-2.01967	-0.15839	2.73062	3.03306	0.76764	0.0344379	-0.148592	-1.0993	-0.678101	0.985276	-3.15056	-2.93099	-1.59601	-0.531447	0.351748	-3.34222	-2.06442	-0.678512	2.23462	-2.36346	0.156141	-0.390287	-1.81971	-0.546245	-1.78442	-1.03875	-4.32865	-1.67172	-3.05952	-1.33732	-1.95599	0.357494	-3.11693	-1.25228	-1.78591	-1.39959	-1.13735	-0.68198	-2.62083	-1.07288
1029	Steffi Oesterreich (Matthew Sikora)	02_Steffi_Oesterreich__Matthew_Sikora_			sample	Steffi_ Oesterreich__Matthew_Sikora_46	44_L_A_siW4_A	Human Cell Line	-0.781476	-1.95297	-0.101712	2.59804	2.87423	0.653955	-0.0558732	-0.109716	-1.10127	-0.515966	0.84999	-3.00988	-3.04964	-1.61974	-0.558398	0.267837	-3.14259	-1.95253	-0.863911	1.99202	-2.39847	0.0846743	-0.221761	-1.81821	-0.481581	-1.81312	-1.01826	-4.54991	-1.54061	-3.03456	-1.28734	-1.98365	0.304792	-3.12259	-1.29812	-1.78635	-1.30991	-1.209	-0.717025	-2.38484	-1.05514
1030	Steffi Oesterreich (Matthew Sikora)	02_Steffi_Oesterreich__Matthew_Sikora_			sample	Steffi_ Oesterreich__Matthew_Sikora_47	44_L_A_siW4_B	Human Cell Line	-0.80059	-1.96514	-0.0792151	2.65914	2.7775	0.71663	-0.157955	-0.0510398	-1.06549	-0.429353	0.919785	-3.04419	-3.00549	-1.62775	-0.542645	0.409046	-3.12714	-1.97989	-0.944064	2.04973	-2.42456	0.0841052	-0.288908	-1.85494	-0.552233	-1.90355	-1.11206	-4.47675	-1.58969	-2.93918	-1.32109	-1.92504	0.285982	-3.22564	-1.26037	-1.73066	-1.25031	-1.19546	-0.76744	-2.38636	-1.08575
1031	Steffi Oesterreich (Matthew Sikora)	02_Steffi_Oesterreich__Matthew_Sikora_			sample	Steffi_ Oesterreich__Matthew_Sikora_48	44_L_A_siW4_C	Human Cell Line	-0.784617	-1.83787	-0.0496584	2.6485	2.77397	0.748053	-0.104892	-0.114068	-1.09453	-0.298219	0.971646	-3.13851	-3.0949	-1.66865	-0.576107	0.326315	-3.10424	-1.90939	-0.921119	2.22811	-2.41948	0.0448781	-0.271247	-1.883	-0.442885	-1.85705	-1.12348	-4.37765	-1.61937	-2.95279	-1.32868	-1.96429	0.24803	-3.15465	-1.28812	-1.72068	-1.06673	-1.24628	-0.769346	-2.16987	-1.02176
[truncated: 264 more columns]

## Sheet: NormLinear
								Antibody Name	14-3-3-beta	14-3-3-epsilon	14-3-3-zeta	4E-BP1	4E-BP1_pS65	53BP1	A-Raf	ACC1	ACC_pS79	ADAR1	Akt	Akt_pS473	Akt_pT308	AMPK-a2_pS345	AMPKa	AMPKa_pT172	Annexin-I	Annexin-VII	AR	ARID1A	Atg3	Atg7	ATM	ATM_pS1981	ATRX	ATR_pS428	Aurora-B	Axl	b-Actin	b-Catenin	b-Catenin_pT41_S45	B-Raf	B-Raf_pS445	B7-H4	Bad_pS112	Bak	BAP1	Bax	Bcl-xL	Bcl2	Bcl2A1
								Antibody Origin	R	M	R	R	R	R	R	R	R	M	R	R	R	R	R	R	M	M	R	R	R	R	R	R	R	R	R	R	R	R	R	R	R	R	R	R	M	R	R	M	R
								Gene Name	YWHAB	YWHAE	YWHAZ	EIF4EBP1	EIF4EBP1	TP53BP1	ARAF	ACACA	ACACA	ADAR	AKT1	AKT1	AKT1	PRKAA2	PRKAA1	PRKAA1	ANXA1	ANXA7	AR	ARID1A	ATG3	ATG7	ATM	ATM	ATRX	ATR	AIM1	AXL	ACTB	CTNNB1	CTNNB1	BRAF	BRAF	VTCN1	BAD	BAK1	BAP1	BAX	BCL2L1	BCL2	BCL2A1
								Validation Status	V	C	V	V	V	V	V	C	V	V	V	V	V	V	C	C	V	V	V	C	V	V	V	V	C	C	V	V	C	V	V	V	V	C	V	C	V	V	V	V	V
								Slide Id	GBL1097167	GBL1097218	GBL1097168	GBL1127627	GBL1127628	GBL1127723	GBL1097083	GBL1127630	GBL1127629	GBL1097197	GBL1127744	GBL1127653	GBL1096764	GBL1097105	GBL1127631	GBL1127632	GBL1097200	GBL1097196	GBL1127703	GBL1097118	GBL1097126	GBL1097127	GBL1097107	GBL1097108	GBL1097123	GBL1097150	GBL1097115	GBL1097095	GBL1096769	GBL1127636	GBL1096770	GBL1127640	GBL1127641	GBL1097145	GBL1127633	GBL1127634	GBL1096773	GBL1127635	GBL1127637	GBL1097211	GBL1097097
								Antibody Name in Heatmap	14-3-3-beta-R-V	14-3-3-epsilon-M-C	14-3-3-zeta-R-V	4E-BP1-R-V	4E-BP1_pS65-R-V	53BP1-R-V	A-Raf-R-V	ACC1-R-C	ACC_pS79-R-V	ADAR1-M-V	Akt-R-V	Akt_pS473-R-V	Akt_pT308-R-V	AMPK-a2_pS345-R-V	AMPKa-R-C	AMPKa_pT172-R-C	Annexin-I-M-V	Annexin-VII-M-V	AR-R-V	ARID1A-R-C	Atg3-R-V	Atg7-R-V	ATM-R-V	ATM_pS1981-R-V	ATRX-R-C	ATR_pS428-R-C	Aurora-B-R-V	Axl-R-V	b-Actin-R-C	b-Catenin-R-V	b-Catenin_pT41_S45-R-V	B-Raf-R-V	B-Raf_pS445-R-V	B7-H4-R-C	Bad_pS112-R-V	Bak-R-C	BAP1-M-V	Bax-R-V	Bcl-xL-R-V	Bcl2-M-V	Bcl2A1-R-V
								Probabilities (QC Score)	0.941227	0.874559	0.915085	0.952785	0.94976	0.949028	0.953359	0.95636	0.942759	0.930905	0.93997	0.938374	0.91691	0.898949	0.952592	0.947203	0.919867	0.876725	0.922823	0.954081	0.932384	0.946005	0.948108	0.914733	0.94277	0.914961	0.938313	0.94511	0.89267	0.935404	0.929661	0.911703	0.947036	0.882249	0.944329	0.917993	0.896735	0.940768	0.950311	0.836327	0.936572
								Slide no.	1	2	3	4	5	6	7	8	9	10	11	12	13	14	15	16	17	18	19	20	21	22	23	24	25	26	27	28	29	30	31	32	33	34	35	36	37	38	39	40	41
Order	Sample Source	Category_1	Category_2	Category_3	CF1&2 Outliers	Sample Name	Sample description	Sample Type	14-3-3-beta-R-V	14-3-3-epsilon-M-C	14-3-3-zeta-R-V	4E-BP1-R-V	4E-BP1_pS65-R-V	53BP1-R-V	A-Raf-R-V	ACC1-R-C	ACC_pS79-R-V	ADAR1-M-V	Akt-R-V	Akt_pS473-R-V	Akt_pT308-R-V	AMPK-a2_pS345-R-V	AMPKa-R-C	AMPKa_pT172-R-C	Annexin-I-M-V	Annexin-VII-M-V	AR-R-V	ARID1A-R-C	Atg3-R-V	Atg7-R-V	ATM-R-V	ATM_pS1981-R-V	ATRX-R-C	ATR_pS428-R-C	Aurora-B-R-V	Axl-R-V	b-Actin-R-C	b-Catenin-R-V	b-Catenin_pT41_S45-R-V	B-Raf-R-V	B-Raf_pS445-R-V	B7-H4-R-C	Bad_pS112-R-V	Bak-R-C	BAP1-M-V	Bax-R-V	Bcl-xL-R-V	Bcl2-M-V	Bcl2A1-R-V
									NormLinear	NormLinear	NormLinear	NormLinear	NormLinear	NormLinear	NormLinear	NormLinear	NormLinear	NormLinear	NormLinear	NormLinear	NormLinear	NormLinear	NormLinear	NormLinear	NormLinear	NormLinear	NormLinear	NormLinear	NormLinear	NormLinear	NormLinear	NormLinear	NormLinear	NormLinear	NormLinear	NormLinear	NormLinear	NormLinear	NormLinear	NormLinear	NormLinear	NormLinear	NormLinear	NormLinear	NormLinear	NormLinear	NormLinear	NormLinear	NormLinear
912	Steffi Oesterreich (Matthew Sikora)	02_Steffi_Oesterreich__Matthew_Sikora_			nominal	Steffi_ Oesterreich__Matthew_Sikora_1	MCF7_Ctrl_A	Human Cell Line	0.894695	1.39197	1.36918	0.15363	0.209675	0.468458	1.11761	1.07203	0.687834	1.24305	2.08257	4.83594	1.82252	0.76261	0.881434	0.831117	1.03476	0.96613	1.11621	0.417422	0.831322	0.924112	0.549816	0.828226	0.510144	0.835109	0.64168	0.951464	1.14315	6.12282	0.955301	0.827996	0.674443	1.79683	1.21423	0.849435	1.06766	1.06421	1.00926	0.617927	1
930	Steffi Oesterreich (Matthew Sikora)	02_Steffi_Oesterreich__Matthew_Sikora_			nominal	Steffi_ Oesterreich__Matthew_Sikora_2	MCF7_Ctrl_B	Human Cell Line	1.06262	1.16063	1.41827	0.164075	0.214792	0.475607	1.21002	1.11622	0.687868	0.912541	2.19132	5.22256	1.89096	0.794402	0.901261	0.826328	0.879117	0.85496	1.23815	0.447888	0.887089	0.920533	0.532625	0.916712	0.499793	0.902666	0.743616	0.915144	1.29541	5.95022	0.977879	0.825847	0.700866	2.03883	1.32248	0.840524	0.734639	1.10053	0.995658	0.488464	1.04907
931	Steffi Oesterreich (Matthew Sikora)	02_Steffi_Oesterreich__Matthew_Sikora_			nominal	Steffi_ Oesterreich__Matthew_Sikora_3	MCF7_Ctrl_C	Human Cell Line	0.943826	1.13649	1.33913	0.164731	0.214257	0.489255	1.26818	1.13305	0.733424	0.923536	2.20878	5.30619	2.02651	0.820029	0.9557	0.829551	0.86049	0.859871	1.22596	0.454507	0.884651	0.928559	0.543592	0.978974	0.500569	0.901018	0.761477	0.852908	1.3134	6.39839	1	0.844534	0.703474	1.98062	1.36301	0.881868	0.741252	1.10627	1.00471	0.478866	1.03808
932	Steffi Oesterreich (Matthew Sikora)	02_Steffi_Oesterreich__Matthew_Sikora_			nominal	Steffi_ Oesterreich__Matthew_Sikora_4	MCF7_E2_A	Human Cell Line	0.898419	1.13706	1.30729	0.163259	0.233956	0.508049	1.18567	1.01954	0.659491	0.930335	2.05119	7.51611	2.66684	0.866376	0.90562	0.845883	0.86765	0.861656	1.36391	0.470972	0.866533	0.907747	0.558468	0.959058	0.488985	0.942531	0.981615	0.768642	1.23272	7.05733	1.00152	0.857157	0.686963	1.36706	1.386	0.891891	0.744232	1.06724	0.907262	0.609988	1.00861
933	Steffi Oesterreich (Matthew Sikora)	02_Steffi_Oesterreich__Matthew_Sikora_			nominal	Steffi_ Oesterreich__Matthew_Sikora_5	MCF7_E2_B	Human Cell Line	0.871044	1.15399	1.28239	0.163131	0.217982	0.483485	1.15724	0.993177	0.626334	0.964889	1.90214	6.83166	2.65337	0.846292	0.879886	0.830274	1.02385	0.915789	1.33357	0.454493	0.874833	0.88914	0.580879	0.938147	0.518132	0.930028	1.01603	0.683034	1.22996	6.60762	0.987638	0.894357	0.678995	1.3109	1.32717	0.848729	0.765369	1.05105	0.943813	0.693285	1.04273
934	Steffi Oesterreich (Matthew Sikora)	02_Steffi_Oesterreich__Matthew_Sikora_			nominal	Steffi_ Oesterreich__Matthew_Sikora_6	MCF7_E2_C	Human Cell Line	0.899671	1.18666	1.26808	0.161602	0.220979	0.483961	1.06885	1.01126	0.596049	1.00151	1.91464	6.54979	2.34524	0.783822	0.858498	0.796752	1.04812	0.898038	1.25039	0.438991	0.835087	0.906693	0.5432	0.904433	0.491048	0.865697	0.952128	0.859294	1.16721	6.11377	0.952096	0.853142	0.673887	1.24567	1.29535	0.841228	0.795093	1.03927	0.913468	0.687526	1.09074
935	Steffi Oesterreich (Matthew Sikora)	02_Steffi_Oesterreich__Matthew_Sikora_			nominal	Steffi_ Oesterreich__Matthew_Sikora_7	MM134_Ctrl_A	Human Cell Line	0.954285	1.11784	0.993167	0.917695	0.845881	2.12706	0.995857	0.994917	0.964438	1.27897	1.00902	0.908813	0.960738	0.943734	1.03585	1.3844	0.909329	1.03365	1.92072	1.30124	0.986941	0.826404	1.5851	0.925715	1.11336	1.0468	0.94166	1.16327	0.788218	0.977038	1.00612	1.05823	1.45559	0.51222	0.998686	1.10503	1.10161	1.12606	1.01791	1.36724	0.943043
936	Steffi Oesterreich (Matthew Sikora)	02_Steffi_Oesterreich__Matthew_Sikora_			nominal	Steffi_ Oesterreich__Matthew_Sikora_8	MM134_Ctrl_B	Human Cell Line	0.968144	1.14223	1.02616	0.860418	0.854251	1.98642	1.00225	1.01756	0.945422	1.39027	0.965696	0.89424	0.965626	0.893986	1.05621	1.42132	0.820642	0.981999	1.81352	1.25612	0.991935	0.857216	1.55246	0.931163	1.21827	1.04316	0.879107	1.28211	0.763293	0.938038	0.983016	1.0784	1.51607	0.573064	1.00378	1.10696	1.17101	1.13934	1.04158	1.35714	0.890095
954	Steffi Oesterreich (Matthew Sikora)	02_Steffi_Oesterreich__Matthew_Sikora_			nominal	Steffi_ Oesterreich__Matthew_Sikora_9	MM134_Ctrl_C	Human Cell Line	1.0554	0.939378	1.06871	0.974896	0.864326	1.95457	1.02207	1.01643	0.951637	0.992829	0.97649	0.860215	0.97227	0.950385	1.05783	1.45842	0.686873	0.929184	1.95489	1.19424	1.05408	0.843544	1.52841	0.971918	1.07131	1.11716	0.951022	1.12324	0.858057	0.912561	1.01192	1.11319	1.57974	0.617616	1.0309	1.03681	0.817347	1.15662	1.06501	1.19774	0.972393
955	Steffi Oesterreich (Matthew Sikora)	02_Steffi_Oesterreich__Matthew_Sikora_			nominal	Steffi_ Oesterreich__Matthew_Sikora_10	MM134_E2_A	Human Cell Line	1.02368	0.909172	0.984849	0.941956	0.969981	1.89182	1.03538	0.993213	0.919982	0.962969	0.911472	0.78412	1.00223	0.960457	1.00169	1.38694	0.694093	0.813312	1.60927	1.15456	1.0601	0.828185	1.4937	1.01333	1.06524	1.1132	0.986219	0.989137	0.931152	0.899467	0.998294	1.14168	1.72959	0.570401	1.03272	1.06995	0.759701	1.15842	1.06085	1.25378	1.00375
956	Steffi Oesterreich (Matthew Sikora)	02_Steffi_Oesterreich__Matthew_Sikora_			nominal	Steffi_ Oesterreich__Matthew_Sikora_11	MM134_E2_B	Human Cell Line	1.00026	0.930783	0.996969	0.947004	0.932986	1.8059	1.00437	1.00276	0.975796	0.982475	0.929817	0.764676	0.975597	0.986529	1.025	1.34967	0.726484	0.878524	1.70828	1.27139	1.04052	0.845784	1.51613	0.968953	1.04766	1.04687	0.928604	1.10984	0.907325	0.955196	0.995464	1.11472	1.78688	0.553446	1.02299	1.05829	0.798179	1.12916	1.03083	1.32601	0.972998
957	Steffi Oesterreich (Matthew Sikora)	02_Steffi_Oesterreich__Matthew_Sikora_			nominal	Steffi_ Oesterreich__Matthew_Sikora_12	MM134_E2_C	Human Cell Line	0.964453	0.943097	1.05291	0.870357	0.986334	1.82531	0.976664	1.01167	0.923359	1.0583	0.942969	0.833867	1.03853	0.920044	1.02151	1.35711	0.716334	0.915332	1.57483	1.18028	1.00348	0.8315	1.53439	0.975264	1.06783	1.02281	0.957695	1.07188	0.909481	0.933176	0.989226	1.13521	1.69787	0.544099	1.039	1.07605	0.830002	1.15112	1.09483	1.34931	0.995475
958	Steffi Oesterreich (Matthew Sikora)	02_Steffi_Oesterreich__Matthew_Sikora_			nominal	Steffi_ Oesterreich__Matthew_Sikora_13	MM134_E2_siSCR_A	Human Cell Line	1.01752	1.01528	1.04596	0.961965	0.954463	1.92898	1.01651	1.03893	1.06927	1.17358	0.974951	0.811161	0.985711	0.946626	0.97791	1.42164	0.784044	0.919586	1.50845	1.17368	0.951056	0.847866	1.43471	0.940385	1.03786	1.00337	0.979394	1.0212	0.896082	0.886962	0.990737	1.09297	1.61286	0.552875	1.03782	1.11669	0.935084	1.16891	1.07758	1.30762	0.927047
959	Steffi Oesterreich (Matthew Sikora)	02_Steffi_Oesterreich__Matthew_Sikora_			nominal	Steffi_ Oesterreich__Matthew_Sikora_14	MM134_E2_siSCR_B	Human Cell Line	0.972596	1.08431	1.03663	1.01986	1.03811	2.0871	1.01193	0.982202	1.01566	1.2907	1.04649	0.830546	0.993807	0.922773	0.982935	1.42847	0.830921	0.973274	1.49768	1.26199	0.91172	0.835638	1.37607	0.935566	1.02319	1.02792	0.965043	1.02411	0.899993	0.85257	0.977622	1.04732	1.48997	0.551248	1.03076	1.10312	1.0767	1.16173	1.08013	1.43953	0.939399
960	Steffi Oesterreich (Matthew Sikora)	02_Steffi_Oesterreich__Matthew_Sikora_			nominal	Steffi_ Oesterreich__Matthew_Sikora_15	MM134_E2_siSCR_C	Human Cell Line	0.981721	1.10836	1.01234	0.947147	1.0279	2.01806	1.06335	1.01386	1.05239	1.42702	1.01052	0.836431	0.940455	0.855269	1.00327	1.45901	0.759988	0.930591	1.42027	1.26457	0.886034	0.873672	1.40074	0.847323	1.15295	1.05571	0.903627	1.05319	0.817472	0.857975	0.989553	1.04174	1.44122	0.56583	1.0789	1.07771	1.20251	1.19955	1.08484	1.44921	0.891104
978	Steffi Oesterreich (Matthew Sikora)	02_Steffi_Oesterreich__Matthew_Sikora_			nominal	Steffi_ Oesterreich__Matthew_Sikora_16	MM134_E2_siW4_A	Human Cell Line	1.07297	0.933156	1.06065	0.811128	0.864461	1.78775	0.890094	1.03626	0.968361	0.991053	0.951533	0.82883	1.01561	0.951654	1.01744	1.25262	0.743641	0.909257	1.36274	0.933742	1.0282	0.822166	1.58067	0.984827	1.10204	1.14435	1.02256	0.898436	0.787948	0.979905	0.975146	1.16296	1.77437	0.5813	1.01216	1.08788	0.822445	1.102	1.03589	1.35604	0.983767
979	Steffi Oesterreich (Matthew Sikora)	02_Steffi_Oesterreich__Matthew_Sikora_			nominal	Steffi_ Oesterreich__Matthew_Sikora_17	MM134_E2_siW4_B	Human Cell Line	1.03662	0.905751	1.00798	0.787943	0.841837	1.89817	0.844874	1.02325	0.972464	0.988349	0.914965	0.76883	0.997594	0.944041	1.05568	1.3986	0.745147	0.87589	1.34424	1.02076	0.998425	0.812675	1.51149	1.00624	1.08029	1.1053	1.05031	0.945622	0.833709	0.820677	0.990151	1.1331	1.84493	0.54642	1.0628	1.16198	0.771447	1.19442	1.03382	1.34887	1.01412
980	Steffi Oesterreich (Matthew Sikora)	02_Steffi_Oesterreich__Matthew_Sikora_			nominal	Steffi_ Oesterreich__Matthew_Sikora_18	MM134_E2_siW4_C	Human Cell Line	1.01403	0.970489	1.01019	0.776292	0.783397	1.86894	0.854837	0.987019	0.901321	0.988234	0.902982	0.796116	1.01549	0.980752	1.04324	1.24782	0.774855	0.898338	1.34656	1.02138	0.999502	0.855984	1.54078	1.01394	1.10363	1.07043	1.04445	0.983932	0.828321	0.960909	0.98076	1.1299	1.74182	0.573374	1.03038	1.14677	0.802051	1.1509	1.01342	1.34928	1.00895
981	Steffi Oesterreich (Matthew Sikora)	02_Steffi_Oesterreich__Matthew_Sikora_			nominal	Steffi_ Oesterreich__Matthew_Sikora_19	44PE_Ctrl_A	Human Cell Line	0.989953	1.07779	0.997769	1.31933	0.817198	0.770579	0.973791	0.601763	0.912808	0.965275	0.938998	1.17761	1.05583	1.03209	0.922825	0.740323	1.50821	1.41997	0.760216	0.879822	0.983836	1.20325	0.841697	1.07593	1.07785	0.879955	0.974983	1.06935	1.1583	1.07916	1.07385	1.01748	0.777124	1.08121	1.02833	1.07431	0.952696	0.950195	1.06376	1.30748	1.04053
982	Steffi Oesterreich (Matthew Sikora)	02_Steffi_Oesterreich__Matthew_Sikora_			nominal	Steffi_ Oesterreich__Matthew_Sikora_20	44PE_Ctrl_B	Human Cell Line	0.99206	1.10716	1.01856	1.29841	0.73833	0.783441	0.97497	0.604814	0.850983	1.01457	0.947132	1.20302	1.04807	1.02114	0.901221	0.739962	1.63992	1.42018	0.770378	0.843904	0.977532	1.14032	0.826203	1.04249	1.09314	0.858699	0.931829	1.18208	1.11157	1.14234	1.04581	0.980619	0.80507	1.11502	1.00219	1.06012	1.10942	0.93159	1.05243	1.36299	1.02048
983	Steffi Oesterreich (Matthew Sikora)	02_Steffi_Oesterreich__Matthew_Sikora_			nominal	Steffi_ Oesterreich__Matthew_Sikora_21	44PE_Ctrl_C	Human Cell Line	0.974518	1.18461	1.02402	1.37666	0.835478	0.838217	0.973555	0.612092	0.821039	1.09169	1.0496	1.19313	0.969957	0.987536	0.902154	0.753287	1.57931	1.51996	0.764439	0.988832	0.96052	1.13038	0.827155	0.999231	1.09251	0.835278	0.890635	1.05852	1.07403	1.03629	1.0488	0.975033	0.743105	1.04408	1.00114	1.09015	1.22898	0.924618	1.06745	1.38112	1.00048
984	Steffi Oesterreich (Matthew Sikora)	02_Steffi_Oesterreich__Matthew_Sikora_			nominal	Steffi_ Oesterreich__Matthew_Sikora_22	44PE_E2_A	Human Cell Line	0.932364	1.23089	0.921352	1.47723	1.15177	0.837706	0.996844	0.633143	0.737757	1.2384	1.12668	1.16155	0.935994	0.962935	0.867044	0.770815	1.77169	1.36431	1.0752	0.927396	0.93447	1.21318	0.898256	0.977935	1.17619	0.902437	0.999712	1.11483	0.982431	1.06258	1.03334	0.960959	0.809503	1.0284	0.977625	1.06271	1.29001	0.890702	1.04349	1.56874	0.929719
996	Steffi Oesterreich (Matthew Sikora)	02_Steffi_Oesterreich__Matthew_Sikora_			nominal	Steffi_ Oesterreich__Matthew_Sikora_23	44PE_E2_B	Human Cell Line	1.12757	1.00002	0.993706	1.43502	1.09247	0.810538	0.996194	0.510115	0.734612	0.873327	1.07399	1.14036	1.16284	1.05513	0.830796	0.730191	1.63622	1.38372	1.14699	0.853567	1.02728	1.14985	0.887871	1.07472	1.07442	0.973992	1.06198	1.12044	1.06668	1.10132	0.981886	0.9741	0.77317	1.15721	0.909371	0.883167	1.00437	0.844867	1.05547	1.37448	1.06063
997	Steffi Oesterreich (Matthew Sikora)	02_Steffi_Oesterreich__Matthew_Sikora_			nominal	Steffi_ Oesterreich__Matthew_Sikora_24	44PE_E2_C	Human Cell Line	1.06607	0.981472	0.94734	1.54307	1.16556	0.809328	0.955274	0.54159	0.766842	0.889813	1.01866	1.21277	0.990244	1.0697	0.887748	0.77394	1.55995	1.36364	1.10909	0.805644	1.02974	1.13646	0.856861	1.06744	0.971782	0.992993	1.07086	1.05547	1.13013	1.01629	1.03098	1.0044	0.76177	1.03255	0.964475	1.03926	0.8046	0.945063	1.04122	1.30173	1.04525
998	Steffi Oesterreich (Matthew Sikora)	02_Steffi_Oesterreich__Matthew_Sikora_			nominal	Steffi_ Oesterreich__Matthew_Sikora_25	44PE_E2_siSCR_A	Human Cell Line	1.08535	1.03274	0.962707	1.5152	1.27663	0.780661	1.01396	0.553322	0.862555	0.853113	1.074	1.26242	1.02788	1.05771	0.840589	0.7098	1.66592	1.34502	1.12084	0.851169	1.02452	1.18954	0.80262	1.05878	1.0111	0.982222	1.0698	1.11044	1.14907	1.0226	0.995916	0.970146	0.78604	1.08062	0.963285	1.00073	0.992445	0.934011	1.0829	1.27078	1.00168
999	Steffi Oesterreich (Matthew Sikora)	02_Steffi_Oesterreich__Matthew_Sikora_			nominal	Steffi_ Oesterreich__Matthew_Sikora_26	44PE_E2_siSCR_B	Human Cell Line	1.09831	1.01056	0.961929	1.47933	1.13557	0.740582	1.04405	0.555552	0.847697	0.898146	1.11744	1.15021	1.01101	1.03472	0.895072	0.811134	1.69001	1.31011	1.07267	0.941741	1.0048	1.16113	0.812734	1.06833	1.01458	1	1.08746	1.1045	1.18844	0.987297	1.01741	0.989817	0.776675	1.05529	0.992322	1.12484	0.895726	0.919895	1.01418	1.2872	1.00553
1000	Steffi Oesterreich (Matthew Sikora)	02_Steffi_Oesterreich__Matthew_Sikora_			nominal	Steffi_ Oesterreich__Matthew_Sikora_27	44PE_E2_siSCR_C	Human Cell Line	1.11893	1.05199	0.943037	1.37906	1.06643	0.775515	1.04252	0.541396	0.771569	0.913264	1.08362	1.19536	1.00782	1.06463	0.858893	0.684759	1.74869	1.29902	1.08687	1.00649	1.02571	1.1459	0.834451	1.07343	1.08777	0.975001	1.07129	1.27677	1.10715	1.03117	1.01141	0.997857	0.76795	1.132	0.9556	1.01937	0.971233	0.900669	1.03304	1.2256	1.01509
1001	Steffi Oesterreich (Matthew Sikora)	02_Steffi_Oesterreich__Matthew_Sikora_			nominal	Steffi_ Oesterreich__Matthew_Sikora_28	44PE_E2_siW4_A	Human Cell Line	1.06043	1.00195	0.920215	1.41502	1.08805	0.737454	0.94724	0.514945	0.844915	0.889582	0.944903	1.15968	0.981292	1.05506	0.890049	0.853053	1.57984	1.32028	0.8939	0.793468	1.03509	1.16083	0.858415	1.08494	0.978159	0.969447	1.11307	1.05512	1.17335	1.0225	1.04709	1.00746	0.7297	0.98039	0.999171	1.01268	0.896314	0.956525	0.993153	1.29017	1.02991
1002	Steffi Oesterreich (Matthew Sikora)	02_Steffi_Oesterreich__Matthew_Sikora_			nominal	Steffi_ Oesterreich__Matthew_Sikora_29	44PE_E2_siW4_B	Human Cell Line	1.05526	1.01025	0.961469	1.3776	1.06347	0.796433	0.966183	0.550543	0.800987	0.891325	1.04616	1.18059	0.964875	1.00825	0.876514	0.827123	1.67511	1.3652	0.9659	0.892482	1.02592	1.1907	0.840268	1.03432	1.00179	0.961185	1.0723	1.09536	1.08992	1.1287	1.05408	0.967889	0.84347	1.00811	0.967148	0.971148	0.950209	0.897481	1.04346	1.34213	1.01014
1003	Steffi Oesterreich (Matthew Sikora)	02_Steffi_Oesterreich__Matthew_Sikora_			nominal	Steffi_ Oesterreich__Matthew_Sikora_30	44PE_E2_siW4_C	Human Cell Line	1.02722	0.997119	0.975032	1.38896	1.15572	0.785878	0.961821	0.577444	0.786489	0.918903	0.978907	1.09921	0.946479	1.06396	0.912382	0.839925	1.60588	1.32709	0.984848	0.882664	1.00914	1.20058	0.848146	1.06246	1.0272	0.943842	1.1058	0.996129	1.15763	0.947172	1.03503	0.990578	0.84272	0.965694	0.971025	0.99081	0.906249	0.885903	0.99853	1.27879	1.03859
1004	Steffi Oesterreich (Matthew Sikora)	02_Steffi_Oesterreich__Matthew_Sikora_			nominal	Steffi_ Oesterreich__Matthew_Sikora_31	134_L_E_Ctrl_A	Human Cell Line	0.943774	0.89855	0.848334	0.788902	1.00799	1.43311	0.886109	1.5299	1.38993	1	0.96586	0.72191	0.966119	1.09642	1.40693	1.00844	0.99061	0.902931	0.571635	1.10276	1.08535	1.02298	1.25971	0.970656	0.875439	1.11092	0.866485	1.05882	0.99425	0.992505	0.964828	0.963715	1.0172	1.5099	0.949967	0.974444	0.921698	1.05294	0.876279	0.245558	1.01128
1005	Steffi Oesterreich (Matthew Sikora)	02_Steffi_Oesterreich__Matthew_Sikora_			nominal	Steffi_ Oesterreich__Matthew_Sikora_32	134_L_E_Ctrl_B	Human Cell Line	0.896262	0.924457	0.937577	0.830479	1.14024	1.30164	0.858064	1.4915	1.3953	1.09635	0.980039	0.690296	0.971895	1.02897	1.35651	0.991103	1.01097	0.886842	0.548131	1.13587	1.0804	0.980025	1.25086	0.956806	0.876192	1.06182	0.835278	0.889725	0.982023	0.893058	0.983436	0.965295	1.03848	1.48357	0.940615	0.979704	0.937259	1.05876	0.913653	0.268586	1.02998
1006	Steffi Oesterreich (Matthew Sikora)	02_Steffi_Oesterreich__Matthew_Sikora_			nominal	Steffi_ Oesterreich__Matthew_Sikora_33	134_L_E_Ctrl_C	Human Cell Line	0.877711	0.960082	0.961887	0.776181	0.992008	1.31088	0.849568	1.41947	1.34246	1.13336	0.980034	0.746077	1.00802	1.0218	1.28155	0.983855	1.05449	0.955841	0.543608	1.03538	1.06035	0.989615	1.24347	0.916745	0.8681	1.04636	0.806268	0.987923	0.979483	0.943102	0.99075	0.977872	0.977224	1.48331	0.954654	0.970169	1.05654	1.03768	0.871774	0.29074	0.966402
1007	Steffi Oesterreich (Matthew Sikora)	02_Steffi_Oesterreich__Matthew_Sikora_			nominal	Steffi_ Oesterreich__Matthew_Sikora_34	134_L_E_siSCR_A	Human Cell Line	0.863888	1.05054	0.955152	0.774647	1.04001	1.3174	0.893309	1.39545	1.46205	1.23238	1.0314	0.634093	0.884996	0.988049	1.20907	1.02541	1.01959	0.981486	0.496149	1.10382	0.920772	1.027	1.08586	0.866775	0.849387	1.01807	0.842695	0.874711	1.04871	0.786963	0.95728	0.912191	0.904628	1.47284	0.937472	0.946319	1.23924	1.02378	0.893299	0.294236	1.02037
1008	Steffi Oesterreich (Matthew Sikora)	02_Steffi_Oesterreich__Matthew_Sikora_			nominal	Steffi_ Oesterreich__Matthew_Sikora_35	134_L_E_siSCR_B	Human Cell Line	0.870025	1.1042	0.928508	0.797171	1.08658	1.4372	0.948304	1.58731	1.5051	1.38094	1.05971	0.691272	0.883856	0.977183	1.25314	1.03506	1.08776	0.955292	0.489587	1.10579	0.950431	1.06481	1.12788	0.818039	0.873258	1.06063	0.816337	0.89691	0.973622	0.839384	0.976428	0.911626	0.954973	1.50155	0.936286	0.914941	1.31232	1.03823	0.907155	0.288644	0.919391
1019	Steffi Oesterreich (Matthew Sikora)	02_Steffi_Oesterreich__Matthew_Sikora_			nominal	Steffi_ Oesterreich__Matthew_Sikora_36	134_L_E_siSCR_C	Human Cell Line	1.01147	0.902327	0.903709	0.832275	0.968833	1.25206	0.989334	1.3892	1.55615	0.9812	0.945416	0.652935	0.915006	1.05728	1.30145	1.07624	0.935012	0.927314	0.512379	0.970089	1.05449	1.0562	1.09289	0.976891	0.855363	1.19263	0.893767	0.855112	1.1836	0.626589	0.918087	0.946374	0.986542	1.70586	0.954218	0.895159	0.946958	1.02314	0.885404	0.212568	1.04626
1020	Steffi Oesterreich (Matthew Sikora)	02_Steffi_Oesterreich__Matthew_Sikora_			nominal	Steffi_ Oesterreich__Matthew_Sikora_37	134_L_E_siW4_A	Human Cell Line	1.06444	0.882482	0.949879	0.764195	0.889547	1.15627	0.734978	1.4251	1.20406	0.932887	0.952451	0.660078	0.995482	1.03613	1.27349	0.95818	1.04296	0.961477	0.485567	0.770788	1.15073	0.972992	1.2096	0.95048	0.877152	1.22573	0.909905	0.972595	1.11539	0.930018	0.935363	0.960701	1.05911	1.71913	0.916562	0.896741	1.04491	0.994003	0.854827	0.209902	1.02381
1021	Steffi Oesterreich (Matthew Sikora)	02_Steffi_Oesterreich__Matthew_Sikora_			nominal	Steffi_ Oesterreich__Matthew_Sikora_38	134_L_E_siW4_B	Human Cell Line	0.996489	0.890711	0.929064	0.810029	0.909584	1.2022	0.757474	1.34299	1.30373	0.94069	0.915656	0.695595	0.982667	1.05742	1.28831	0.975858	1.01503	0.939176	0.504918	0.794615	1.1149	0.973929	1.19298	0.963397	0.89729	1.24395	0.93905	0.816474	1.07683	0.736398	0.935736	0.981762	1.04163	1.73746	0.954295	0.947587	0.917992	1.05275	0.791735	0.21339	1.05926
1022	Steffi Oesterreich (Matthew Sikora)	02_Steffi_Oesterreich__Matthew_Sikora_			nominal	Steffi_ Oesterreich__Matthew_Sikora_39	134_L_E_siW4_C	Human Cell Line	1.09149	0.893504	0.919416	0.79073	0.878935	1.23361	0.735172	1.38364	1.26608	0.941249	0.928335	0.72643	0.99093	1.05648	1.19804	0.915613	1.03327	0.980798	0.495473	0.803131	1.09914	0.973821	1.25522	0.960407	0.88401	1.24735	0.902903	0.888543	1.07761	0.881499	0.941449	0.955186	1.02988	1.69971	0.896216	0.918047	1.01069	1.02032	0.874807	0.208291	1.0131
1023	Steffi Oesterreich (Matthew Sikora)	02_Steffi_Oesterreich__Matthew_Sikora_			nominal	Steffi_ Oesterreich__Matthew_Sikora_40	44_L_A_Ctrl_A	Human Cell Line	1.10282	0.963801	1.03026	2.01325	1.84918	0.945123	1.15773	0.565999	0.989763	0.968381	0.902461	1.03274	1.00178	1.07459	1.04689	1.09244	0.952041	1.09456	0.627674	0.766312	1.01483	1.00615	0.988528	1.08773	1.04388	1.07747	1.25095	1.06018	0.91117	1.10536	1.04005	1.09175	1.05194	0.672263	0.971044	1.13656	1.05374	0.941329	0.992285	0.662419	0.972433
1024	Steffi Oesterreich (Matthew Sikora)	02_Steffi_Oesterreich__Matthew_Sikora_			nominal	Steffi_ Oesterreich__Matthew_Sikora_41	44_L_A_Ctrl_B	Human Cell Line	1.15805	0.956059	1.04112	2.12371	1.93739	1.06936	1.11718	0.610117	1.00175	0.987031	1.05677	1.09086	0.940934	1.06554	1.00297	1.13672	1.00719	1.16856	0.611879	1.20323	1.03435	1.13213	1.02496	1.09069	1.0327	1.03524	1.26402	1.16131	0.868954	1.16166	1.02046	1.07295	1.07882	0.660274	0.97898	1.02147	1.10637	0.902602	0.971952	0.598677	0.959907
1025	Steffi Oesterreich (Matthew Sikora)	02_Steffi_Oesterreich__Matthew_Sikora_			nominal	Steffi_ Oesterreich__Matthew_Sikora_42	44_L_A_Ctrl_C	Human Cell Line	1.12387	0.926093	1.0413	1.9071	1.85205	1.07543	1.14804	0.586337	0.95929	0.974079	1.00773	1.03114	0.907212	1.0104	1.04438	1.06889	0.916767	1.10904	0.619643	1.26091	0.994044	1.18864	1.02581	1.02401	1.07165	1.06852	1.37742	0.847223	0.881014	0.945318	1.00876	1.05773	1.05322	0.660923	0.959544	1.09579	1.01469	0.911015	0.910141	0.632828	0.932675
1026	Steffi Oesterreich (Matthew Sikora)	02_Steffi_Oesterreich__Matthew_Sikora_			nominal	Steffi_ Oesterreich__Matthew_Sikora_43	44_L_A_siSCR_A	Human Cell Line	1.11495	0.976316	1.033	1.7025	1.81151	0.983635	1.14424	0.597977	1.0788	0.992697	0.962944	0.98819	0.922892	1.0506	0.98877	1.14499	0.966404	1.14549	0.67157	1.15166	0.99682	1.14211	0.929518	1.06202	0.979258	1.09394	1.33016	0.955283	0.8843	1.01741	1.03549	1.06101	1.06876	0.698331	0.979084	0.955179	1.10395	0.899977	1.02114	0.619817	1.05198
1027	Steffi Oesterreich (Matthew Sikora)	02_Steffi_Oesterreich__Matthew_Sikora_			nominal	Steffi_ Oesterreich__Matthew_Sikora_44	44_L_A_siSCR_B	Human Cell Line	1.02499	0.963424	1.01947	1.7345	1.79755	0.996726	1.19801	0.597467	1.17226	0.974483	0.981226	0.958806	0.929672	1.08697	1.05717	1.28309	0.819219	1.03991	0.713258	1.21959	0.969116	1.19007	0.945471	1.07561	1.01949	1.04103	1.32913	1	0.853273	0.853473	1.01363	1.05333	1.15864	0.622955	1.0494	0.995074	1.04673	0.904103	1.00316	0.580177	0.97186
1028	Steffi Oesterreich (Matthew Sikora)	02_Steffi_Oesterreich__Matthew_Sikora_			nominal	Steffi_ Oesterreich__Matthew_Sikora_45	44_L_A_siSCR_C	Human Cell Line	1.02767	1.00273	1.03749	1.71356	1.81406	1.04579	1.11061	0.59785	1.13538	0.991418	0.951169	0.967818	1.00616	1.06956	1.03852	1.16587	0.919156	1.10826	0.697504	1.17908	0.965992	1.14909	0.925062	1.04457	0.985299	1.00289	1.28701	1.06781	0.830039	0.983989	1.0238	1.07587	1.13866	0.655038	1.03599	0.997605	1.1143	0.913238	1.01565	0.595694	0.9524
1029	Steffi Oesterreich (Matthew Sikora)	02_Steffi_Oesterreich__Matthew_Sikora_			nominal	Steffi_ Oesterreich__Matthew_Sikora_46	44_L_A_siW4_A	Human Cell Line	0.984536	1.0211	1.04919	1.51983	1.57996	0.939785	1.01434	0.597174	1.10243	1.07862	0.84205	1.0374	0.901062	1.02298	0.991073	1.06953	1.02634	1.16448	0.596406	0.968983	0.916725	1.06327	1.0109	1.0167	1.00194	0.955917	1.26928	0.890624	0.883837	0.973444	1.03055	1.02622	1.06742	0.634406	0.975803	0.969689	1.15294	0.844933	0.963832	0.682132	0.937487
1030	Steffi Oesterreich (Matthew Sikora)	02_Steffi_Oesterreich__Matthew_Sikora_			nominal	Steffi_ Oesterreich__Matthew_Sikora_47	44_L_A_siW4_B	Human Cell Line	0.992927	1.03478	1.08909	1.62042	1.50996	1.00308	0.965811	0.635629	1.15495	1.17053	0.903208	1.03528	0.949476	1.03967	1.02397	1.20543	1.06018	1.1677	0.576571	1.03069	0.920083	1.08621	0.98613	1.01292	0.975014	0.917563	1.21552	0.95754	0.873049	1.06282	1.02884	1.09225	1.07674	0.603651	1.02368	1.03	1.22797	0.871639	0.951184	0.696387	0.93797
1031	Steffi Oesterreich (Matthew Sikora)	02_Steffi_Oesterreich__Matthew_Sikora_			nominal	Steffi_ Oesterreich__Matthew_Sikora_48	44_L_A_siW4_C	Human Cell Line	0.982893	1.10647	1.08828	1.57473	1.47463	1.00363	0.98095	0.595678	1.10816	1.25499	0.916601	0.949391	0.873675	0.989385	0.979478	1.11434	1.05452	1.20043	0.57351	1.14185	0.903931	1.03487	0.977308	0.972549	1.02969	0.927719	1.1806	1.00409	0.837304	1.03073	1.00195	1.04061	1.02676	0.620779	0.983092	1.01536	1.36531	0.823795	0.929975	0.792142	0.959913
[truncated: 266 more columns]

## Sheet: NormLog2
								Antibody Name	14-3-3-beta	14-3-3-epsilon	14-3-3-zeta	4E-BP1	4E-BP1_pS65	53BP1	A-Raf	ACC1	ACC_pS79	ADAR1	Akt	Akt_pS473	Akt_pT308	AMPK-a2_pS345	AMPKa	AMPKa_pT172	Annexin-I	Annexin-VII	AR	ARID1A	Atg3	Atg7	ATM	ATM_pS1981	ATRX	ATR_pS428	Aurora-B	Axl	b-Actin	b-Catenin	b-Catenin_pT41_S45	B-Raf	B-Raf_pS445	B7-H4	Bad_pS112	Bak	BAP1	Bax	Bcl-xL	Bcl2	Bcl2A1
								Antibody Origin	R	M	R	R	R	R	R	R	R	M	R	R	R	R	R	R	M	M	R	R	R	R	R	R	R	R	R	R	R	R	R	R	R	R	R	R	M	R	R	M	R
								Gene Name	YWHAB	YWHAE	YWHAZ	EIF4EBP1	EIF4EBP1	TP53BP1	ARAF	ACACA	ACACA	ADAR	AKT1	AKT1	AKT1	PRKAA2	PRKAA1	PRKAA1	ANXA1	ANXA7	AR	ARID1A	ATG3	ATG7	ATM	ATM	ATRX	ATR	AIM1	AXL	ACTB	CTNNB1	CTNNB1	BRAF	BRAF	VTCN1	BAD	BAK1	BAP1	BAX	BCL2L1	BCL2	BCL2A1
								Validation Status	V	C	V	V	V	V	V	C	V	V	V	V	V	V	C	C	V	V	V	C	V	V	V	V	C	C	V	V	C	V	V	V	V	C	V	C	V	V	V	V	V
								Slide Id	GBL1097167	GBL1097218	GBL1097168	GBL1127627	GBL1127628	GBL1127723	GBL1097083	GBL1127630	GBL1127629	GBL1097197	GBL1127744	GBL1127653	GBL1096764	GBL1097105	GBL1127631	GBL1127632	GBL1097200	GBL1097196	GBL1127703	GBL1097118	GBL1097126	GBL1097127	GBL1097107	GBL1097108	GBL1097123	GBL1097150	GBL1097115	GBL1097095	GBL1096769	GBL1127636	GBL1096770	GBL1127640	GBL1127641	GBL1097145	GBL1127633	GBL1127634	GBL1096773	GBL1127635	GBL1127637	GBL1097211	GBL1097097
								Antibody Name in Heatmap	14-3-3-beta-R-V	14-3-3-epsilon-M-C	14-3-3-zeta-R-V	4E-BP1-R-V	4E-BP1_pS65-R-V	53BP1-R-V	A-Raf-R-V	ACC1-R-C	ACC_pS79-R-V	ADAR1-M-V	Akt-R-V	Akt_pS473-R-V	Akt_pT308-R-V	AMPK-a2_pS345-R-V	AMPKa-R-C	AMPKa_pT172-R-C	Annexin-I-M-V	Annexin-VII-M-V	AR-R-V	ARID1A-R-C	Atg3-R-V	Atg7-R-V	ATM-R-V	ATM_pS1981-R-V	ATRX-R-C	ATR_pS428-R-C	Aurora-B-R-V	Axl-R-V	b-Actin-R-C	b-Catenin-R-V	b-Catenin_pT41_S45-R-V	B-Raf-R-V	B-Raf_pS445-R-V	B7-H4-R-C	Bad_pS112-R-V	Bak-R-C	BAP1-M-V	Bax-R-V	Bcl-xL-R-V	Bcl2-M-V	Bcl2A1-R-V
								Probabilities (QC Score)	0.941227	0.874559	0.915085	0.952785	0.94976	0.949028	0.953359	0.95636	0.942759	0.930905	0.93997	0.938374	0.91691	0.898949	0.952592	0.947203	0.919867	0.876725	0.922823	0.954081	0.932384	0.946005	0.948108	0.914733	0.94277	0.914961	0.938313	0.94511	0.89267	0.935404	0.929661	0.911703	0.947036	0.882249	0.944329	0.917993	0.896735	0.940768	0.950311	0.836327	0.936572
								Slide no.	1	2	3	4	5	6	7	8	9	10	11	12	13	14	15	16	17	18	19	20	21	22	23	24	25	26	27	28	29	30	31	32	33	34	35	36	37	38	39	40	41
Order	Sample Source	Category_1	Category_2	Category_3	Sample	Sample Name	Sample description	Sample Type	14-3-3-beta-R-V	14-3-3-epsilon-M-C	14-3-3-zeta-R-V	4E-BP1-R-V	4E-BP1_pS65-R-V	53BP1-R-V	A-Raf-R-V	ACC1-R-C	ACC_pS79-R-V	ADAR1-M-V	Akt-R-V	Akt_pS473-R-V	Akt_pT308-R-V	AMPK-a2_pS345-R-V	AMPKa-R-C	AMPKa_pT172-R-C	Annexin-I-M-V	Annexin-VII-M-V	AR-R-V	ARID1A-R-C	Atg3-R-V	Atg7-R-V	ATM-R-V	ATM_pS1981-R-V	ATRX-R-C	ATR_pS428-R-C	Aurora-B-R-V	Axl-R-V	b-Actin-R-C	b-Catenin-R-V	b-Catenin_pT41_S45-R-V	B-Raf-R-V	B-Raf_pS445-R-V	B7-H4-R-C	Bad_pS112-R-V	Bak-R-C	BAP1-M-V	Bax-R-V	Bcl-xL-R-V	Bcl2-M-V	Bcl2A1-R-V
									NormLog2	NormLog2	NormLog2	NormLog2	NormLog2	NormLog2	NormLog2	NormLog2	NormLog2	NormLog2	NormLog2	NormLog2	NormLog2	NormLog2	NormLog2	NormLog2	NormLog2	NormLog2	NormLog2	NormLog2	NormLog2	NormLog2	NormLog2	NormLog2	NormLog2	NormLog2	NormLog2	NormLog2	NormLog2	NormLog2	NormLog2	NormLog2	NormLog2	NormLog2	NormLog2	NormLog2	NormLog2	NormLog2	NormLog2	NormLog2	NormLog2
912	Steffi Oesterreich (Matthew Sikora)	02_Steffi_Oesterreich__Matthew_Sikora_			sample	Steffi_ Oesterreich__Matthew_Sikora_1	MCF7_Ctrl_A	Human Cell Line	-0.160532	0.477123	0.453307	-2.70247	-2.25377	-1.09401	0.160416	0.10035	-0.539868	0.313882	1.05837	2.2738	0.865933	-0.390983	-0.182076	-0.266876	0.0492966	-0.0497106	0.158609	-1.26042	-0.26652	-0.11386	-0.862979	-0.271903	-0.971023	-0.259963	-0.640073	-0.0717792	0.193015	2.6142	-0.065973	-0.272304	-0.568231	0.845457	0.280041	-0.235425	0.0944579	0.0897801	0.0133035	-0.694491	0
930	Steffi Oesterreich (Matthew Sikora)	02_Steffi_Oesterreich__Matthew_Sikora_			sample	Steffi_ Oesterreich__Matthew_Sikora_2	MCF7_Ctrl_B	Human Cell Line	0.0876325	0.214908	0.504132	-2.60757	-2.21899	-1.07216	0.275033	0.158619	-0.539796	-0.132038	1.1318	2.38476	0.919118	-0.332059	-0.149983	-0.275213	-0.185873	-0.226071	0.308187	-1.15879	-0.17285	-0.119459	-0.908808	-0.12546	-1.0006	-0.147735	-0.42737	-0.127929	0.373412	2.57294	-0.0322726	-0.276054	-0.512789	1.02774	0.403246	-0.250639	-0.444893	0.138196	-0.00627729	-1.03368	0.0691068
931	Steffi Oesterreich (Matthew Sikora)	02_Steffi_Oesterreich__Matthew_Sikora_			sample	Steffi_ Oesterreich__Matthew_Sikora_3	MCF7_Ctrl_C	Human Cell Line	-0.0834078	0.18458	0.421301	-2.60182	-2.22259	-1.03134	0.342755	0.180209	-0.447281	-0.114761	1.14325	2.40768	1.019	-0.286254	-0.0653703	-0.269597	-0.21677	-0.217807	0.293908	-1.13763	-0.17682	-0.106935	-0.879404	-0.0306578	-0.99836	-0.150372	-0.393128	-0.229538	0.393311	2.67771	0	-0.243773	-0.507431	0.98595	0.446799	-0.181365	-0.431964	0.145697	0.006773	-1.0623	0.0539187
932	Steffi Oesterreich (Matthew Sikora)	02_Steffi_Oesterreich__Matthew_Sikora_			sample	Steffi_ Oesterreich__Matthew_Sikora_4	MCF7_E2_A	Human Cell Line	-0.15454	0.185307	0.386579	-2.61477	-2.09569	-0.97696	0.245706	0.0279144	-0.600574	-0.104177	1.03646	2.90999	1.41513	-0.206935	-0.143022	-0.24147	-0.204815	-0.214817	0.44775	-1.08629	-0.206673	-0.139638	-0.840454	-0.0603101	-1.03214	-0.0853886	-0.0267714	-0.379616	0.30184	2.81912	0.00219507	-0.222368	-0.541696	0.451076	0.470925	-0.16506	-0.426177	0.093881	-0.140409	-0.713148	0.0123743
933	Steffi Oesterreich (Matthew Sikora)	02_Steffi_Oesterreich__Matthew_Sikora_			sample	Steffi_ Oesterreich__Matthew_Sikora_5	MCF7_E2_B	Human Cell Line	-0.199182	0.206626	0.358835	-2.6159	-2.19772	-1.04846	0.210686	-0.00987759	-0.674996	-0.0515653	0.927621	2.77224	1.40782	-0.240773	-0.184611	-0.268341	0.034009	-0.126912	0.41529	-1.13767	-0.19292	-0.169517	-0.783691	-0.0921139	-0.948607	-0.104654	0.0229394	-0.549971	0.298608	2.72413	-0.0179454	-0.161078	-0.558526	0.390558	0.408358	-0.236624	-0.385773	0.0718294	-0.0834273	-0.528479	0.0603708
934	Steffi Oesterreich (Matthew Sikora)	02_Steffi_Oesterreich__Matthew_Sikora_			sample	Steffi_ Oesterreich__Matthew_Sikora_6	MCF7_E2_C	Human Cell Line	-0.15253	0.246912	0.342648	-2.62948	-2.17802	-1.04704	0.0960563	0.0161546	-0.746497	0.00218385	0.937076	2.71145	1.22974	-0.351401	-0.220114	-0.327797	0.0678094	-0.155152	0.322376	-1.18774	-0.260001	-0.141314	-0.880444	-0.144915	-1.02606	-0.208066	-0.0707722	-0.218776	0.223069	2.61206	-0.0708215	-0.229142	-0.569422	0.316918	0.373347	-0.249431	-0.330804	0.0555741	-0.130574	-0.540515	0.125309
935	Steffi Oesterreich (Matthew Sikora)	02_Steffi_Oesterreich__Matthew_Sikora_			sample	Steffi_ Oesterreich__Matthew_Sikora_7	MM134_Ctrl_A	Human Cell Line	-0.0675085	0.160711	-0.00989131	-0.123913	-0.241473	1.08886	-0.00598892	-0.00735125	-0.0522389	0.354977	0.0129578	-0.137945	-0.0577849	-0.0835478	0.0508186	0.469258	-0.137126	0.0477519	0.941647	0.379886	-0.0189645	-0.275081	0.66457	-0.11136	0.154921	0.0659822	-0.0867218	0.218184	-0.343333	-0.0335134	0.00880204	0.0816511	0.541601	-0.965163	-0.00189637	0.144084	0.139612	0.171287	0.0256099	0.451264	-0.0846043
936	Steffi Oesterreich (Matthew Sikora)	02_Steffi_Oesterreich__Matthew_Sikora_			sample	Steffi_ Oesterreich__Matthew_Sikora_8	MM134_Ctrl_B	Human Cell Line	-0.0467066	0.191849	0.0372536	-0.21689	-0.227268	0.990172	0.00324734	0.0251102	-0.080969	0.475364	-0.0503592	-0.161267	-0.050464	-0.161676	0.0788934	0.507236	-0.285175	-0.026207	0.858793	0.328975	-0.0116829	-0.22227	0.634558	-0.102895	0.284837	0.0609636	-0.18589	0.358525	-0.389692	-0.0922821	-0.0247128	0.108897	0.600332	-0.803232	0.00544548	0.146608	0.22775	0.188203	0.0587674	0.440571	-0.167969
954	Steffi Oesterreich (Matthew Sikora)	02_Steffi_Oesterreich__Matthew_Sikora_			sample	Steffi_ Oesterreich__Matthew_Sikora_9	MM134_Ctrl_C	Human Cell Line	0.0777844	-0.0902222	0.0958651	-0.0366798	-0.210353	0.966854	0.0314896	0.0235075	-0.0715174	-0.0103824	-0.0343228	-0.21723	-0.0405713	-0.0734155	0.0811074	0.544403	-0.541885	-0.105964	0.967085	0.256089	0.075989	-0.245464	0.612033	-0.041093	0.0993715	0.159839	-0.07245	0.167664	-0.220854	-0.132007	0.0170887	0.154706	0.659684	-0.695218	0.0439012	0.0521542	-0.290979	0.209909	0.0908659	0.260317	-0.0403882
955	Steffi Oesterreich (Matthew Sikora)	02_Steffi_Oesterreich__Matthew_Sikora_			sample	Steffi_ Oesterreich__Matthew_Sikora_10	MM134_E2_A	Human Cell Line	0.0337652	-0.137375	-0.0220259	-0.086268	-0.0439718	0.919773	0.0501628	-0.00982551	-0.120322	-0.0544394	-0.13373	-0.350854	0.00321948	-0.0582067	0.00243069	0.471907	-0.526798	-0.298119	0.686405	0.207341	0.0841977	-0.271974	0.578889	0.0190977	0.0911823	0.154716	-0.0200202	-0.0157572	-0.102911	-0.152857	-0.00246396	0.191155	0.790426	-0.80995	0.0464561	0.0975368	-0.396496	0.212153	0.0852165	0.326282	0.00539613
956	Steffi Oesterreich (Matthew Sikora)	02_Steffi_Oesterreich__Matthew_Sikora_			sample	Steffi_ Oesterreich__Matthew_Sikora_11	MM134_E2_B	Human Cell Line	0.000376965	-0.103484	-0.00437998	-0.0785581	-0.100072	0.852719	0.00629289	0.00397022	-0.0353478	-0.0255071	-0.104982	-0.387079	-0.0356422	-0.0195666	0.035621	0.432605	-0.460996	-0.186847	0.772546	0.346405	0.0573018	-0.241638	0.60039	-0.045501	0.0671668	0.0660849	-0.106865	0.150348	-0.140308	-0.0661315	-0.00655956	0.156688	0.837439	-0.853486	0.0327855	0.0817394	-0.325216	0.175255	0.0438101	0.407093	-0.0394906
957	Steffi Oesterreich (Matthew Sikora)	02_Steffi_Oesterreich__Matthew_Sikora_			sample	Steffi_ Oesterreich__Matthew_Sikora_12	MM134_E2_C	Human Cell Line	-0.052217	-0.084522	0.0743881	-0.200321	-0.0198516	0.868141	-0.034066	0.0167367	-0.115037	0.0817526	-0.0847177	-0.26211	0.0545484	-0.120226	0.0307037	0.440538	-0.481295	-0.127633	0.655196	0.239134	0.00501698	-0.266212	0.617662	-0.0361359	0.0946803	0.0325395	-0.0623611	0.100149	-0.136885	-0.0997786	-0.0156277	0.182958	0.763724	-0.878058	0.0551973	0.10574	-0.268813	0.203044	0.1307	0.432226	-0.00654242
958	Steffi Oesterreich (Matthew Sikora)	02_Steffi_Oesterreich__Matthew_Sikora_			sample	Steffi_ Oesterreich__Matthew_Sikora_13	MM134_E2_siSCR_A	Human Cell Line	0.0250616	0.0218794	0.064825	-0.0559439	-0.0672386	0.947837	0.0236176	0.0551046	0.0966248	0.230915	-0.0365984	-0.30194	-0.0207639	-0.0791341	-0.0322262	0.507557	-0.350993	-0.120943	0.593063	0.231043	-0.0723982	-0.238092	0.520762	-0.0886773	0.0536072	0.00485314	-0.0300386	0.0302724	-0.158297	-0.173055	-0.0134259	0.128257	0.689623	-0.854976	0.0535599	0.159226	-0.0968315	0.225158	0.107793	0.386947	-0.109286
959	Steffi Oesterreich (Matthew Sikora)	02_Steffi_Oesterreich__Matthew_Sikora_			sample	Steffi_ Oesterreich__Matthew_Sikora_14	MM134_E2_siSCR_B	Human Cell Line	-0.040087	0.116777	0.0518999	0.0283767	0.0539619	1.0615	0.0171161	-0.025909	0.0224176	0.368158	0.0655559	-0.267867	-0.0089622	-0.115952	-0.0248327	0.514469	-0.267216	-0.0390816	0.582727	0.335698	-0.133337	-0.25905	0.460549	-0.0960886	0.0330675	0.0397223	-0.0513354	0.0343685	-0.152014	-0.23011	-0.0326513	0.0667023	0.575282	-0.859226	0.0437044	0.141595	0.106623	0.216279	0.111201	0.525595	-0.0901896
960	Steffi Oesterreich (Matthew Sikora)	02_Steffi_Oesterreich__Matthew_Sikora_			sample	Steffi_ Oesterreich__Matthew_Sikora_15	MM134_E2_siSCR_C	Human Cell Line	-0.0266153	0.14843	0.0176912	-0.0783395	0.0396992	1.01297	0.0886153	0.0198577	0.0736754	0.513006	0.0150917	-0.257682	-0.0885697	-0.22555	0.00470389	0.544989	-0.395951	-0.103781	0.506168	0.338648	-0.174566	-0.194837	0.48619	-0.239016	0.205332	0.078219	-0.146201	0.07476	-0.290759	-0.220992	-0.0151515	0.0589968	0.527293	-0.821561	0.109563	0.107973	0.266047	0.262491	0.117479	0.535266	-0.166334
978	Steffi Oesterreich (Matthew Sikora)	02_Steffi_Oesterreich__Matthew_Sikora_			sample	Steffi_ Oesterreich__Matthew_Sikora_16	MM134_E2_siW4_A	Human Cell Line	0.101614	-0.0998092	0.0849428	-0.301999	-0.210127	0.838142	-0.16797	0.05138	-0.0463839	-0.0129658	-0.0716749	-0.270852	0.0223471	-0.0714913	0.0249428	0.324948	-0.427321	-0.137241	0.446512	-0.0989038	0.0401161	-0.282498	0.660535	-0.0220574	0.140173	0.194523	0.0321826	-0.154513	-0.343828	-0.0292859	-0.0363102	0.217807	0.827311	-0.782645	0.0174424	0.121521	-0.282009	0.140129	0.0508731	0.439396	-0.0236119
979	Steffi Oesterreich (Matthew Sikora)	02_Steffi_Oesterreich__Matthew_Sikora_			sample	Steffi_ Oesterreich__Matthew_Sikora_17	MM134_E2_siW4_B	Human Cell Line	0.0518934	-0.142813	0.0114602	-0.343838	-0.248387	0.924611	-0.243192	0.0331611	-0.0402829	-0.016908	-0.128211	-0.379263	-0.00347502	-0.0830789	0.0781707	0.483988	-0.424404	-0.191179	0.426787	0.0296424	-0.00227376	-0.29925	0.595973	0.00897938	0.111419	0.144434	0.0708158	-0.0806647	-0.262384	-0.285114	-0.0142801	0.180274	0.883562	-0.871917	0.087866	0.216586	-0.37436	0.25631	0.0479829	0.431755	0.0202308
980	Steffi Oesterreich (Matthew Sikora)	02_Steffi_Oesterreich__Matthew_Sikora_			sample	Steffi_ Oesterreich__Matthew_Sikora_18	MM134_E2_siW4_C	Human Cell Line	0.0201042	-0.0432159	0.0146224	-0.365328	-0.352184	0.902218	-0.226279	-0.0188496	-0.149887	-0.0170749	-0.147231	-0.328949	0.0221785	-0.0280396	0.0610668	0.319415	-0.368002	-0.15467	0.429279	0.0305242	-0.000718374	-0.224345	0.623657	0.0199731	0.142251	0.0981898	0.0627395	-0.0233698	-0.271738	-0.0575287	-0.0280278	0.176198	0.800599	-0.802451	0.0431731	0.197582	-0.318234	0.202764	0.0192359	0.432188	0.0128494
981	Steffi Oesterreich (Matthew Sikora)	02_Steffi_Oesterreich__Matthew_Sikora_			sample	Steffi_ Oesterreich__Matthew_Sikora_19	44PE_Ctrl_A	Human Cell Line	-0.0145688	0.108071	-0.0032228	0.399805	-0.291242	-0.375986	-0.0383153	-0.732734	-0.131617	-0.0509881	-0.0908055	0.235859	0.0783772	0.0455724	-0.115871	-0.433774	0.592837	0.505858	-0.395519	-0.184716	-0.0235104	0.266941	-0.248627	0.105586	0.10815	-0.184498	-0.0365508	0.0967313	0.212006	0.10991	0.102796	0.0250013	-0.363784	0.112647	0.0403089	0.103413	-0.0699122	-0.0737039	0.0891699	0.386786	0.057313
982	Steffi Oesterreich (Matthew Sikora)	02_Steffi_Oesterreich__Matthew_Sikora_			sample	Steffi_ Oesterreich__Matthew_Sikora_20	44PE_Ctrl_B	Human Cell Line	-0.0115014	0.146866	0.0265276	0.376747	-0.437663	-0.352104	-0.0365702	-0.725437	-0.232799	0.0208657	-0.0783623	0.266664	0.0677378	0.0301829	-0.150047	-0.434478	0.71363	0.506077	-0.376361	-0.24485	-0.0327848	0.189433	-0.275431	0.0600321	0.128476	-0.219775	-0.101863	0.241322	0.152598	0.191994	0.064627	-0.0282351	-0.312814	0.157064	0.00315474	0.0842247	0.1498	-0.102232	0.0737287	0.446779	0.0292474
983	Steffi Oesterreich (Matthew Sikora)	02_Steffi_Oesterreich__Matthew_Sikora_			sample	Steffi_ Oesterreich__Matthew_Sikora_21	44PE_Ctrl_C	Human Cell Line	-0.0372391	0.244416	0.0342462	0.461173	-0.259326	-0.254605	-0.0386649	-0.70818	-0.284478	0.126567	0.0698443	0.254756	-0.0440075	-0.0180949	-0.148555	-0.408728	0.659298	0.604038	-0.387526	-0.0162021	-0.0581124	0.176806	-0.27377	-0.00110987	0.127645	-0.259672	-0.167094	0.0820504	0.10303	0.0514225	0.0687454	-0.0364764	-0.428362	0.0622254	0.00164985	0.124523	0.297467	-0.11307	0.0941625	0.465841	0.000690672
984	Steffi Oesterreich (Matthew Sikora)	02_Steffi_Oesterreich__Matthew_Sikora_			sample	Steffi_ Oesterreich__Matthew_Sikora_22	44PE_E2_A	Human Cell Line	-0.101034	0.299707	-0.118175	0.562898	0.203854	-0.255484	-0.004561	-0.659396	-0.438782	0.308479	0.172071	0.216051	-0.0954291	-0.0544904	-0.205824	-0.375544	0.82513	0.448169	0.10461	-0.108743	-0.0977794	0.278797	-0.154801	-0.0321893	0.234118	-0.148102	-0.00041583	0.156827	-0.025572	0.0875669	0.0473195	-0.0574526	-0.304891	0.0403979	-0.0326465	0.0877534	0.367378	-0.166985	0.0614119	0.649607	-0.105133
996	Steffi Oesterreich (Matthew Sikora)	02_Steffi_Oesterreich__Matthew_Sikora_			sample	Steffi_ Oesterreich__Matthew_Sikora_23	44PE_E2_B	Human Cell Line	0.17322	3.43281e-05	-0.00910895	0.521071	0.127591	-0.303048	-0.00550133	-0.971106	-0.444946	-0.195406	0.10298	0.189495	0.217649	0.0774262	-0.267434	-0.453655	0.710365	0.468555	0.197847	-0.228423	0.0388343	0.20145	-0.171579	0.103957	0.103557	-0.0380179	0.0867554	0.164071	0.0931333	0.139239	-0.0263725	-0.0378587	-0.371142	0.210645	-0.137059	-0.179243	0.00628913	-0.243203	0.0778924	0.458886	0.084927
997	Steffi Oesterreich (Matthew Sikora)	02_Steffi_Oesterreich__Matthew_Sikora_			sample	Steffi_ Oesterreich__Matthew_Sikora_24	44PE_E2_C	Human Cell Line	0.092305	-0.026981	-0.0780465	0.625806	0.22102	-0.305204	-0.0660128	-0.884726	-0.383	-0.168426	0.0266719	0.278308	-0.0141445	0.0972046	-0.171778	-0.369705	0.641503	0.447466	0.14937	-0.311785	0.0422795	0.184543	-0.222867	0.0941592	-0.0412952	-0.010145	0.0987725	0.0778811	0.176494	0.0233172	0.0440134	0.00633776	-0.392573	0.0462051	-0.0521849	0.0555587	-0.313656	-0.0815181	0.0582699	0.380425	0.0638547
998	Steffi Oesterreich (Matthew Sikora)	02_Steffi_Oesterreich__Matthew_Sikora_			sample	Steffi_ Oesterreich__Matthew_Sikora_25	44PE_E2_siSCR_A	Human Cell Line	0.118162	0.0464752	-0.0548314	0.599511	0.352335	-0.357232	0.0199975	-0.853809	-0.213312	-0.229191	0.102987	0.336195	0.0396756	0.0809473	-0.250528	-0.494515	0.736321	0.427632	0.164577	-0.232482	0.0349551	0.250404	-0.317211	0.0823966	0.0159282	-0.0258792	0.0973458	0.151136	0.200461	0.0322487	-0.0059036	-0.043726	-0.347326	0.111864	-0.0539654	0.00105735	-0.0109404	-0.0984888	0.114898	0.34572	0.00241647
999	Steffi Oesterreich (Matthew Sikora)	02_Steffi_Oesterreich__Matthew_Sikora_			sample	Steffi_ Oesterreich__Matthew_Sikora_26	44PE_E2_siSCR_B	Human Cell Line	0.135291	0.015153	-0.0559971	0.564945	0.183418	-0.433268	0.0621931	-0.848007	-0.23838	-0.154979	0.160193	0.201903	0.0157969	0.0492344	-0.159924	-0.301989	0.757036	0.389684	0.101204	-0.0865979	0.00691438	0.215535	-0.299145	0.0953537	0.0208889	0	0.120966	0.143396	0.249068	-0.0184439	0.0249049	-0.0147657	-0.364616	0.0776419	-0.0111201	0.169722	-0.158871	-0.120458	0.0203095	0.364233	0.00795184
1000	Steffi Oesterreich (Matthew Sikora)	02_Steffi_Oesterreich__Matthew_Sikora_			sample	Steffi_ Oesterreich__Matthew_Sikora_27	44PE_E2_siSCR_C	Human Cell Line	0.162118	0.0731267	-0.0846139	0.463681	0.0927872	-0.366774	0.0600798	-0.885244	-0.374133	-0.130897	0.115858	0.257442	0.0112444	0.0903546	-0.21945	-0.546332	0.806276	0.377428	0.120174	0.00933327	0.0366174	0.196477	-0.261101	0.102224	0.12138	-0.0365238	0.099351	0.352502	0.14685	0.0442841	0.0163693	-0.00309557	-0.380915	0.178875	-0.0655214	0.0276775	-0.0421112	-0.150931	0.0468897	0.293491	0.0216021
1001	Steffi Oesterreich (Matthew Sikora)	02_Steffi_Oesterreich__Matthew_Sikora_			sample	Steffi_ Oesterreich__Matthew_Sikora_28	44PE_E2_siW4_A	Human Cell Line	0.0846489	0.00281636	-0.119958	0.500825	0.121744	-0.439375	-0.0781983	-0.957509	-0.243123	-0.168801	-0.081762	0.213728	-0.0272451	0.0773202	-0.168043	-0.229293	0.659779	0.400841	-0.161815	-0.333756	0.049756	0.215154	-0.220252	0.117613	-0.0318595	-0.0447653	0.154546	0.0774116	0.23063	0.0320963	0.066384	0.0107158	-0.454625	-0.0285726	-0.00119685	0.0181786	-0.157925	-0.0641252	-0.00991158	0.367562	0.0425242
1002	Steffi Oesterreich (Matthew Sikora)	02_Steffi_Oesterreich__Matthew_Sikora_			sample	Steffi_ Oesterreich__Matthew_Sikora_29	44PE_E2_siW4_B	Human Cell Line	0.0776037	0.0147149	-0.0566883	0.462162	0.0887764	-0.328375	-0.0496321	-0.861072	-0.32015	-0.165977	0.0651061	0.239503	-0.0515863	0.0118575	-0.190151	-0.273826	0.744255	0.449113	-0.0500536	-0.164105	0.0369133	0.251806	-0.251078	0.0486879	0.00258006	-0.0571138	0.100702	0.131411	0.124226	0.174666	0.07598	-0.0470864	-0.245591	0.0116517	-0.0481917	-0.0422376	-0.073683	-0.156046	0.0613761	0.424528	0.0145594
1003	Steffi Oesterreich (Matthew Sikora)	02_Steffi_Oesterreich__Matthew_Sikora_			sample	Steffi_ Oesterreich__Matthew_Sikora_30	44PE_E2_siW4_C	Human Cell Line	0.0387472	-0.0041631	-0.0364786	0.474003	0.208794	-0.347623	-0.05616	-0.792246	-0.346501	-0.122015	-0.030756	0.136468	-0.0793575	0.0894445	-0.13229	-0.251667	0.683364	0.408271	-0.0220267	-0.180063	0.0131205	0.263732	-0.237615	0.0874067	0.0387135	-0.0833827	0.145095	-0.00559618	0.211176	-0.0783021	0.0496667	-0.0136582	-0.246875	-0.0503616	-0.0424201	-0.0133191	-0.142021	-0.17478	-0.00212296	0.35478	0.0546312
1004	Steffi Oesterreich (Matthew Sikora)	02_Steffi_Oesterreich__Matthew_Sikora_			sample	Steffi_ Oesterreich__Matthew_Sikora_31	134_L_E_Ctrl_A	Human Cell Line	-0.0834869	-0.154329	-0.237296	-0.342082	0.0114808	0.519154	-0.174444	0.613435	0.475009	0	-0.0501146	-0.470109	-0.0497271	0.132798	0.492553	0.012121	-0.0136106	-0.147312	-0.806833	0.141121	0.118159	0.0327806	0.333093	-0.0429683	-0.191921	0.15176	-0.206754	0.0824556	-0.00831914	-0.0108541	-0.051656	-0.0533219	0.0246023	0.594452	-0.0740512	-0.0373481	-0.117633	0.074427	-0.190538	-2.02586	0.016181
1005	Steffi Oesterreich (Matthew Sikora)	02_Steffi_Oesterreich__Matthew_Sikora_			sample	Steffi_ Oesterreich__Matthew_Sikora_32	134_L_E_Ctrl_B	Human Cell Line	-0.158007	-0.113322	-0.0929906	-0.267984	0.189343	0.38033	-0.220844	0.576769	0.480578	0.132703	-0.0290887	-0.534712	-0.0411276	0.0412001	0.439898	-0.0128931	0.0157354	-0.173251	-0.867409	0.183801	0.111569	-0.0291096	0.322922	-0.0637021	-0.190681	0.0865408	-0.259671	-0.168568	-0.0261714	-0.163175	-0.0240974	-0.0509576	0.0544752	0.569069	-0.0883244	-0.0295821	-0.0934802	0.082372	-0.130281	-1.89654	0.0426184
1006	Steffi Oesterreich (Matthew Sikora)	02_Steffi_Oesterreich__Matthew_Sikora_			sample	Steffi_ Oesterreich__Matthew_Sikora_33	134_L_E_Ctrl_C	Human Cell Line	-0.188182	-0.0587702	-0.0560603	-0.365536	-0.0115767	0.390539	-0.235198	0.505354	0.424876	0.180602	-0.0290957	-0.422604	0.0115204	0.0311105	0.357893	-0.0234828	0.0765502	-0.0651574	-0.879363	0.0501617	0.0845438	-0.0150604	0.31437	-0.125407	-0.204067	0.0653783	-0.310668	-0.01753	-0.0299075	-0.084514	-0.0134066	-0.0322819	-0.0332387	0.568816	-0.0669497	-0.0436922	0.0793539	0.0533605	-0.197974	-1.7822	-0.049305
1007	Steffi Oesterreich (Matthew Sikora)	02_Steffi_Oesterreich__Matthew_Sikora_			sample	Steffi_ Oesterreich__Matthew_Sikora_34	134_L_E_siSCR_A	Human Cell Line	-0.211084	0.0711337	-0.066198	-0.368388	0.0566008	0.397689	-0.162769	0.480735	0.54799	0.301441	0.044605	-0.657234	-0.176257	-0.0173461	0.273895	0.0361969	0.0279906	-0.0269603	-1.01115	0.142505	-0.119084	0.0384338	0.118839	-0.206271	-0.235506	0.0258433	-0.246918	-0.193122	0.068621	-0.345632	-0.0629876	-0.132592	-0.144603	0.5586	-0.0931523	-0.0796021	0.309454	0.0339012	-0.162785	-1.76496	0.0290947
1008	Steffi Oesterreich (Matthew Sikora)	02_Steffi_Oesterreich__Matthew_Sikora_			sample	Steffi_ Oesterreich__Matthew_Sikora_35	134_L_E_siSCR_B	Human Cell Line	-0.200871	0.142999	-0.107014	-0.327039	0.119796	0.523259	-0.0765788	0.666587	0.589855	0.465655	0.0836713	-0.532676	-0.178116	-0.0332999	0.325547	0.0497199	0.121358	-0.0659856	-1.03036	0.145082	-0.0733468	0.0905916	0.173609	-0.289759	-0.195521	0.0849221	-0.292763	-0.156965	-0.0385658	-0.252598	-0.0344143	-0.133486	-0.0664686	0.586456	-0.0949787	-0.128249	0.392118	0.0541232	-0.140578	-1.79264	-0.12125
1019	Steffi Oesterreich (Matthew Sikora)	02_Steffi_Oesterreich__Matthew_Sikora_			sample	Steffi_ Oesterreich__Matthew_Sikora_36	134_L_E_siSCR_C	Human Cell Line	0.0164593	-0.148278	-0.14607	-0.264867	-0.0456799	0.324304	-0.01547	0.474255	0.637984	-0.0273812	-0.0809781	-0.614989	-0.128147	0.0803513	0.380122	0.106005	-0.0969431	-0.10887	-0.964717	-0.0438104	0.0765493	0.0788886	0.128149	-0.0337309	-0.225392	0.254144	-0.162029	-0.225815	0.243185	-0.674409	-0.123298	-0.079518	-0.0195475	0.7705	-0.0676094	-0.159785	-0.0786277	0.0330014	-0.175593	-2.234	0.0652355
1020	Steffi Oesterreich (Matthew Sikora)	02_Steffi_Oesterreich__Matthew_Sikora_			sample	Steffi_ Oesterreich__Matthew_Sikora_37	134_L_E_siW4_A	Human Cell Line	0.0900897	-0.180362	-0.0741845	-0.387988	-0.168858	0.209483	-0.444228	0.51106	0.267913	-0.100226	-0.0702825	-0.599292	-0.00653279	0.0512109	0.348793	-0.061632	0.0606896	-0.0566757	-1.04226	-0.375593	0.202553	-0.0394996	0.27453	-0.0732718	-0.189101	0.293639	-0.136212	-0.0400886	0.157545	-0.10467	-0.0964012	-0.0578412	0.0828556	0.781682	-0.125695	-0.157237	0.0633798	-0.0086777	-0.226295	-2.25221	0.0339421
1021	Steffi Oesterreich (Matthew Sikora)	02_Steffi_Oesterreich__Matthew_Sikora_			sample	Steffi_ Oesterreich__Matthew_Sikora_38	134_L_E_siW4_B	Human Cell Line	-0.00507468	-0.16697	-0.10615	-0.303955	-0.136722	0.265676	-0.400733	0.425449	0.382642	-0.0882087	-0.127123	-0.52368	-0.0252255	0.0805433	0.365483	-0.0352574	0.0215268	-0.090532	-0.985879	-0.331672	0.156919	-0.038112	0.254567	-0.0537982	-0.156355	0.314929	-0.0907259	-0.292522	0.106785	-0.441442	-0.0958268	-0.0265542	0.058838	0.796982	-0.0674935	-0.07767	-0.123446	0.0741635	-0.336911	-2.22844	0.0830622
1022	Steffi Oesterreich (Matthew Sikora)	02_Steffi_Oesterreich__Matthew_Sikora_			sample	Steffi_ Oesterreich__Matthew_Sikora_39	134_L_E_siW4_C	Human Cell Line	0.126299	-0.162454	-0.121211	-0.338743	-0.186171	0.302881	-0.443847	0.468468	0.340368	-0.0873519	-0.107283	-0.461105	-0.013145	0.0792653	0.260678	-0.12719	0.0472116	-0.0279718	-1.01312	-0.316294	0.136381	-0.0382714	0.327936	-0.0582823	-0.177865	0.31887	-0.147357	-0.170487	0.107838	-0.181969	-0.0870455	-0.066147	0.042473	0.765291	-0.158082	-0.123361	0.0153404	0.0290255	-0.192963	-2.26333	0.018779
1023	Steffi Oesterreich (Matthew Sikora)	02_Steffi_Oesterreich__Matthew_Sikora_			sample	Steffi_ Oesterreich__Matthew_Sikora_40	44_L_A_Ctrl_A	Human Cell Line	0.141199	-0.053193	0.0430092	1.00952	0.886884	-0.0814264	0.211304	-0.821128	-0.0148451	-0.0463534	-0.148064	0.0464788	0.00256685	0.103781	0.0661111	0.127551	-0.0709039	0.130347	-0.671912	-0.383996	0.0212431	0.0088386	-0.0166464	0.121317	0.0619513	0.107653	0.323019	0.0843142	-0.134208	0.144519	0.0566549	0.126643	0.0730548	-0.572902	-0.0423914	0.184671	0.0755232	-0.0872293	-0.0111735	-0.594184	-0.0403298
1024	Steffi Oesterreich (Matthew Sikora)	02_Steffi_Oesterreich__Matthew_Sikora_			sample	Steffi_ Oesterreich__Matthew_Sikora_41	44_L_A_Ctrl_B	Human Cell Line	0.211702	-0.0648277	0.0581401	1.08658	0.954116	0.096747	0.159865	-0.712841	0.0025189	-0.0188321	0.0796581	0.125465	-0.0878345	0.0915854	0.00428365	0.184881	0.0103427	0.224732	-0.708683	0.266909	0.0487175	0.179041	0.0355677	0.125238	0.0464238	0.0499608	0.338015	0.215754	-0.202648	0.216191	0.0292155	0.101587	0.109448	-0.598863	-0.030649	0.0306422	0.145829	-0.147839	-0.0410427	-0.74015	-0.0590341
1025	Steffi Oesterreich (Matthew Sikora)	02_Steffi_Oesterreich__Matthew_Sikora_			sample	Steffi_ Oesterreich__Matthew_Sikora_42	44_L_A_Ctrl_C	Human Cell Line	0.168478	-0.110772	0.0583896	0.931379	0.88912	0.10491	0.199167	-0.770199	-0.0599617	-0.0378893	0.0111129	0.0442441	-0.140488	0.0149324	0.0626429	0.0961178	-0.125372	0.149305	-0.69049	0.334471	-0.00861778	0.249313	0.0367573	0.0342233	0.0998319	0.0956096	0.461966	-0.239187	-0.182763	-0.081129	0.0125887	0.0809718	0.0748067	-0.597445	-0.0595795	0.131968	0.0210395	-0.134453	-0.135839	-0.660116	-0.100554
1026	Steffi Oesterreich (Matthew Sikora)	02_Steffi_Oesterreich__Matthew_Sikora_			sample	Steffi_ Oesterreich__Matthew_Sikora_43	44_L_A_siSCR_A	Human Cell Line	0.156985	-0.0345793	0.0468401	0.767656	0.85719	-0.0238053	0.194393	-0.741839	0.109422	-0.0105743	-0.0544767	-0.0171391	-0.115766	0.0712144	-0.0162938	0.19534	-0.049302	0.19596	-0.57439	0.20372	-0.00459495	0.191699	-0.105445	0.0868157	-0.0302385	0.129537	0.411597	-0.0660005	-0.177392	0.0249069	0.0503153	0.0854424	0.0959375	-0.518016	-0.030496	-0.0661568	0.142671	-0.152041	0.0301844	-0.690086	0.0731049
1027	Steffi Oesterreich (Matthew Sikora)	02_Steffi_Oesterreich__Matthew_Sikora_			sample	Steffi_ Oesterreich__Matthew_Sikora_44	44_L_A_siSCR_B	Human Cell Line	0.0356035	-0.0537569	0.027825	0.794517	0.846028	-0.00473099	0.260639	-0.74307	0.229297	-0.0372909	-0.0273428	-0.0606898	-0.105207	0.120311	0.0802084	0.359617	-0.287679	0.0564581	-0.487505	0.286396	-0.0452588	0.251041	-0.0808947	0.105152	0.0278424	0.0580132	0.410485	0	-0.22892	-0.228583	0.0195375	0.0749544	0.212433	-0.682801	0.0695704	-0.0071249	0.0658953	-0.145441	0.00455404	-0.785435	-0.0411799
1028	Steffi Oesterreich (Matthew Sikora)	02_Steffi_Oesterreich__Matthew_Sikora_			sample	Steffi_ Oesterreich__Matthew_Sikora_45	44_L_A_siSCR_C	Human Cell Line	0.0393817	0.00393852	0.0530998	0.776996	0.859218	0.0645964	0.151357	-0.742144	0.183176	-0.0124348	-0.0722272	-0.0471918	0.00885565	0.0970205	0.0545222	0.221402	-0.121618	0.148302	-0.519726	0.23766	-0.0499165	0.200489	-0.112378	0.0629124	-0.0213661	0.00416858	0.364027	0.0946595	-0.268749	-0.0232858	0.0339394	0.105506	0.187335	-0.61035	0.0510161	-0.00345887	0.156141	-0.130937	0.0224066	-0.747356	-0.070361
1029	Steffi Oesterreich (Matthew Sikora)	02_Steffi_Oesterreich__Matthew_Sikora_			sample	Steffi_ Oesterreich__Matthew_Sikora_46	44_L_A_siW4_A	Human Cell Line	-0.0224845	0.0301293	0.0692695	0.603911	0.659884	-0.0895979	0.0205376	-0.743776	0.140694	0.109191	-0.248021	0.0529775	-0.150302	0.032785	-0.0129371	0.0969828	0.0375058	0.219682	-0.745633	-0.0454566	-0.12544	0.0885133	0.015639	0.0239006	0.00278932	-0.0650426	0.344006	-0.167111	-0.178148	-0.0388304	0.0434094	0.037333	0.0941247	-0.656523	-0.0353384	-0.0444063	0.205318	-0.243091	-0.0531469	-0.551876	-0.0931292
1030	Steffi Oesterreich (Matthew Sikora)	02_Steffi_Oesterreich__Matthew_Sikora_			sample	Steffi_ Oesterreich__Matthew_Sikora_47	44_L_A_siW4_B	Human Cell Line	-0.0102402	0.0493188	0.123124	0.696367	0.594511	0.00443524	-0.0501866	-0.653742	0.207836	0.227162	-0.146869	0.0500199	-0.0747971	0.0561259	0.0341734	0.269549	0.0843077	0.223673	-0.794429	0.0436106	-0.120164	0.119302	-0.0201501	0.0185238	-0.0365048	-0.124121	0.281568	-0.0625947	-0.195865	0.0879005	0.0410196	0.127307	0.106672	-0.728213	0.0337696	0.0426412	0.296276	-0.198197	-0.0722038	-0.522038	-0.0923868
1031	Steffi Oesterreich (Matthew Sikora)	02_Steffi_Oesterreich__Matthew_Sikora_			sample	Steffi_ Oesterreich__Matthew_Sikora_48	44_L_A_siW4_C	Human Cell Line	-0.0248935	0.145965	0.122055	0.655106	0.56035	0.00523263	-0.0277487	-0.747395	0.148166	0.32767	-0.125634	-0.0749258	-0.194832	-0.0153959	-0.0299143	0.156193	0.0765806	0.263551	-0.80211	0.191369	-0.145716	0.0494491	-0.0331147	-0.0401574	0.0422169	-0.108241	0.239522	0.00588528	-0.256177	0.0436623	0.00280354	0.0574227	0.0380948	-0.687849	-0.0246013	0.0219952	0.44923	-0.279643	-0.104736	-0.336168	-0.0590246
[truncated: 264 more columns]

## Sheet: NormLog2_MedianCentered
								Antibody Name	14-3-3-beta	14-3-3-epsilon	14-3-3-zeta	4E-BP1	4E-BP1_pS65	53BP1	A-Raf	ACC1	ACC_pS79	ADAR1	Akt	Akt_pS473	Akt_pT308	AMPK-a2_pS345	AMPKa	AMPKa_pT172	Annexin-I	Annexin-VII	AR	ARID1A	Atg3	Atg7	ATM	ATM_pS1981	ATRX	ATR_pS428	Aurora-B	Axl	b-Actin	b-Catenin	b-Catenin_pT41_S45	B-Raf	B-Raf_pS445	B7-H4	Bad_pS112	Bak	BAP1	Bax	Bcl-xL	Bcl2	Bcl2A1
								Antibody Origin	R	M	R	R	R	R	R	R	R	M	R	R	R	R	R	R	M	M	R	R	R	R	R	R	R	R	R	R	R	R	R	R	R	R	R	R	M	R	R	M	R
								Gene Name	YWHAB	YWHAE	YWHAZ	EIF4EBP1	EIF4EBP1	TP53BP1	ARAF	ACACA	ACACA	ADAR	AKT1	AKT1	AKT1	PRKAA2	PRKAA1	PRKAA1	ANXA1	ANXA7	AR	ARID1A	ATG3	ATG7	ATM	ATM	ATRX	ATR	AIM1	AXL	ACTB	CTNNB1	CTNNB1	BRAF	BRAF	VTCN1	BAD	BAK1	BAP1	BAX	BCL2L1	BCL2	BCL2A1
								Validation Status	V	C	V	V	V	V	V	C	V	V	V	V	V	V	C	C	V	V	V	C	V	V	V	V	C	C	V	V	C	V	V	V	V	C	V	C	V	V	V	V	V
								Slide Id	GBL1097167	GBL1097218	GBL1097168	GBL1127627	GBL1127628	GBL1127723	GBL1097083	GBL1127630	GBL1127629	GBL1097197	GBL1127744	GBL1127653	GBL1096764	GBL1097105	GBL1127631	GBL1127632	GBL1097200	GBL1097196	GBL1127703	GBL1097118	GBL1097126	GBL1097127	GBL1097107	GBL1097108	GBL1097123	GBL1097150	GBL1097115	GBL1097095	GBL1096769	GBL1127636	GBL1096770	GBL1127640	GBL1127641	GBL1097145	GBL1127633	GBL1127634	GBL1096773	GBL1127635	GBL1127637	GBL1097211	GBL1097097
								Antibody Name in Heatmap	14-3-3-beta-R-V	14-3-3-epsilon-M-C	14-3-3-zeta-R-V	4E-BP1-R-V	4E-BP1_pS65-R-V	53BP1-R-V	A-Raf-R-V	ACC1-R-C	ACC_pS79-R-V	ADAR1-M-V	Akt-R-V	Akt_pS473-R-V	Akt_pT308-R-V	AMPK-a2_pS345-R-V	AMPKa-R-C	AMPKa_pT172-R-C	Annexin-I-M-V	Annexin-VII-M-V	AR-R-V	ARID1A-R-C	Atg3-R-V	Atg7-R-V	ATM-R-V	ATM_pS1981-R-V	ATRX-R-C	ATR_pS428-R-C	Aurora-B-R-V	Axl-R-V	b-Actin-R-C	b-Catenin-R-V	b-Catenin_pT41_S45-R-V	B-Raf-R-V	B-Raf_pS445-R-V	B7-H4-R-C	Bad_pS112-R-V	Bak-R-C	BAP1-M-V	Bax-R-V	Bcl-xL-R-V	Bcl2-M-V	Bcl2A1-R-V
								Probabilities (QC Score)	0.941227	0.874559	0.915085	0.952785	0.94976	0.949028	0.953359	0.95636	0.942759	0.930905	0.93997	0.938374	0.91691	0.898949	0.952592	0.947203	0.919867	0.876725	0.922823	0.954081	0.932384	0.946005	0.948108	0.914733	0.94277	0.914961	0.938313	0.94511	0.89267	0.935404	0.929661	0.911703	0.947036	0.882249	0.944329	0.917993	0.896735	0.940768	0.950311	0.836327	0.936572
								Slide no.	1	2	3	4	5	6	7	8	9	10	11	12	13	14	15	16	17	18	19	20	21	22	23	24	25	26	27	28	29	30	31	32	33	34	35	36	37	38	39	40	41
Order	Sample Source	Category_1	Category_2	Category_3	Sample	Sample Name	Sample description	Sample Type	14-3-3-beta-R-V	14-3-3-epsilon-M-C	14-3-3-zeta-R-V	4E-BP1-R-V	4E-BP1_pS65-R-V	53BP1-R-V	A-Raf-R-V	ACC1-R-C	ACC_pS79-R-V	ADAR1-M-V	Akt-R-V	Akt_pS473-R-V	Akt_pT308-R-V	AMPK-a2_pS345-R-V	AMPKa-R-C	AMPKa_pT172-R-C	Annexin-I-M-V	Annexin-VII-M-V	AR-R-V	ARID1A-R-C	Atg3-R-V	Atg7-R-V	ATM-R-V	ATM_pS1981-R-V	ATRX-R-C	ATR_pS428-R-C	Aurora-B-R-V	Axl-R-V	b-Actin-R-C	b-Catenin-R-V	b-Catenin_pT41_S45-R-V	B-Raf-R-V	B-Raf_pS445-R-V	B7-H4-R-C	Bad_pS112-R-V	Bak-R-C	BAP1-M-V	Bax-R-V	Bcl-xL-R-V	Bcl2-M-V	Bcl2A1-R-V
									Median-Centered	Median-Centered	Median-Centered	Median-Centered	Median-Centered	Median-Centered	Median-Centered	Median-Centered	Median-Centered	Median-Centered	Median-Centered	Median-Centered	Median-Centered	Median-Centered	Median-Centered	Median-Centered	Median-Centered	Median-Centered	Median-Centered	Median-Centered	Median-Centered	Median-Centered	Median-Centered	Median-Centered	Median-Centered	Median-Centered	Median-Centered	Median-Centered	Median-Centered	Median-Centered	Median-Centered	Median-Centered	Median-Centered	Median-Centered	Median-Centered	Median-Centered	Median-Centered	Median-Centered	Median-Centered	Median-Centered	Median-Centered
912	Steffi Oesterreich (Matthew Sikora)	02_Steffi_Oesterreich__Matthew_Sikora_			sample	Steffi_ Oesterreich__Matthew_Sikora_1	MCF7_Ctrl_A	Human Cell Line	-0.16895	0.467796	0.43715	-2.63533	-2.25372	-1.12892	0.165447	0.110202	-0.483767	0.330873	1.08829	2.30596	0.883387	-0.404378	-0.185433	-0.291035	0.0306655	-0.0222445	0.11902	-1.25699	-0.263086	-0.134669	-0.862475	-0.24048	-0.995389	-0.289154	-0.611668	-0.0747218	0.218887	2.64048	-0.0617892	-0.273925	-0.608515	0.819432	0.281588	-0.255512	0.120984	0.0563288	-0.0029662	-0.656565	-0.00667399
930	Steffi Oesterreich (Matthew Sikora)	02_Steffi_Oesterreich__Matthew_Sikora_			sample	Steffi_ Oesterreich__Matthew_Sikora_2	MCF7_Ctrl_B	Human Cell Line	0.0792144	0.205582	0.487975	-2.54043	-2.21894	-1.10707	0.280064	0.168471	-0.483696	-0.115047	1.16173	2.41692	0.936572	-0.345454	-0.15334	-0.299372	-0.204505	-0.198605	0.268598	-1.15535	-0.169415	-0.140269	-0.908304	-0.0940363	-1.02496	-0.176927	-0.398965	-0.130872	0.399284	2.59923	-0.0280888	-0.277675	-0.553073	1.00172	0.404793	-0.270726	-0.418367	0.104745	-0.022547	-0.99575	0.0624328
931	Steffi Oesterreich (Matthew Sikora)	02_Steffi_Oesterreich__Matthew_Sikora_			sample	Steffi_ Oesterreich__Matthew_Sikora_3	MCF7_Ctrl_C	Human Cell Line	-0.091826	0.175253	0.405144	-2.53467	-2.22254	-1.06626	0.347786	0.190061	-0.391181	-0.0977691	1.17317	2.43984	1.03645	-0.299649	-0.0687274	-0.293756	-0.235401	-0.190341	0.254319	-1.13419	-0.173385	-0.127745	-0.878901	0.000765747	-1.02273	-0.179563	-0.364723	-0.232481	0.419182	2.70399	0.00418378	-0.245394	-0.547715	0.959925	0.448346	-0.201452	-0.405438	0.112246	-0.00949669	-1.02438	0.0472448
932	Steffi Oesterreich (Matthew Sikora)	02_Steffi_Oesterreich__Matthew_Sikora_			sample	Steffi_ Oesterreich__Matthew_Sikora_4	MCF7_E2_A	Human Cell Line	-0.162958	0.17598	0.370422	-2.54762	-2.09564	-1.01187	0.250737	0.037766	-0.544474	-0.0871857	1.06639	2.94215	1.43258	-0.22033	-0.146379	-0.265629	-0.223446	-0.187351	0.408162	-1.08285	-0.203239	-0.160448	-0.83995	-0.0288865	-1.0565	-0.11458	0.00163361	-0.382558	0.327712	2.84541	0.00637885	-0.22399	-0.58198	0.425052	0.472471	-0.185147	-0.399651	0.0604297	-0.156679	-0.675222	0.0057003
933	Steffi Oesterreich (Matthew Sikora)	02_Steffi_Oesterreich__Matthew_Sikora_			sample	Steffi_ Oesterreich__Matthew_Sikora_5	MCF7_E2_B	Human Cell Line	-0.2076	0.1973	0.342678	-2.54875	-2.19767	-1.08337	0.215717	-2.60382e-05	-0.618895	-0.0345738	0.957546	2.8044	1.42528	-0.254168	-0.187969	-0.292499	0.0153779	-0.0994464	0.375701	-1.13424	-0.189485	-0.190327	-0.783187	-0.0606903	-0.972973	-0.133846	0.0513444	-0.552913	0.32448	2.75042	-0.0137616	-0.162699	-0.59881	0.364533	0.409905	-0.256711	-0.359247	0.0383781	-0.099697	-0.490554	0.0536968
934	Steffi Oesterreich (Matthew Sikora)	02_Steffi_Oesterreich__Matthew_Sikora_			sample	Steffi_ Oesterreich__Matthew_Sikora_6	MCF7_E2_C	Human Cell Line	-0.160948	0.237586	0.326491	-2.56234	-2.17797	-1.08195	0.101087	0.0260062	-0.690397	0.0191753	0.967002	2.74361	1.24719	-0.364796	-0.223471	-0.351956	0.0491783	-0.127686	0.282787	-1.1843	-0.256567	-0.162124	-0.87994	-0.113491	-1.05043	-0.237257	-0.0423672	-0.221718	0.248941	2.63835	-0.0666377	-0.230763	-0.609706	0.290893	0.374894	-0.269518	-0.304279	0.0221228	-0.146843	-0.502589	0.118635
935	Steffi Oesterreich (Matthew Sikora)	02_Steffi_Oesterreich__Matthew_Sikora_			sample	Steffi_ Oesterreich__Matthew_Sikora_7	MM134_Ctrl_A	Human Cell Line	-0.0759266	0.151384	-0.0260481	-0.0567711	-0.241426	1.05395	-0.000957757	0.0025003	0.00386141	0.371969	0.0428836	-0.10578	-0.0403307	-0.0969427	0.0474614	0.445099	-0.155757	0.075218	0.902059	0.38332	-0.0155302	-0.29589	0.665074	-0.0799362	0.130556	0.0367907	-0.0583168	0.215241	-0.317461	-0.00722758	0.0129858	0.08003	0.501318	-0.991188	-0.000349761	0.123997	0.166138	0.137836	0.00934016	0.48919	-0.0912783
936	Steffi Oesterreich (Matthew Sikora)	02_Steffi_Oesterreich__Matthew_Sikora_			sample	Steffi_ Oesterreich__Matthew_Sikora_8	MM134_Ctrl_B	Human Cell Line	-0.0551248	0.182522	0.0210968	-0.149749	-0.22722	0.955257	0.00827851	0.0349618	-0.0248687	0.492356	-0.0204334	-0.129101	-0.0330098	-0.175071	0.0755362	0.483077	-0.303806	0.00125905	0.819204	0.332409	-0.00824852	-0.243079	0.635062	-0.0714713	0.260471	0.0317721	-0.157485	0.355582	-0.36382	-0.0659963	-0.020529	0.107276	0.560048	-0.829257	0.00699208	0.126521	0.254276	0.154752	0.0424977	0.478497	-0.174643
954	Steffi Oesterreich (Matthew Sikora)	02_Steffi_Oesterreich__Matthew_Sikora_			sample	Steffi_ Oesterreich__Matthew_Sikora_9	MM134_Ctrl_C	Human Cell Line	0.0693662	-0.0995489	0.0797083	0.0304619	-0.210305	0.931939	0.0365208	0.033359	-0.0154171	0.00660903	-0.00439696	-0.185065	-0.0231171	-0.0868104	0.0777502	0.520244	-0.560516	-0.0784977	0.927496	0.259524	0.0794234	-0.266274	0.612537	-0.00966945	0.0750059	0.130647	-0.044045	0.164722	-0.194983	-0.105722	0.0212725	0.153085	0.6194	-0.721243	0.0454478	0.0320672	-0.264454	0.176458	0.0745962	0.298243	-0.0470622
955	Steffi Oesterreich (Matthew Sikora)	02_Steffi_Oesterreich__Matthew_Sikora_			sample	Steffi_ Oesterreich__Matthew_Sikora_10	MM134_E2_A	Human Cell Line	0.0253471	-0.146702	-0.0381827	-0.0191263	-0.0439239	0.884858	0.055194	2.60382e-05	-0.0642216	-0.0374479	-0.103804	-0.318689	0.0206737	-0.0716017	-0.000926481	0.447748	-0.545429	-0.270652	0.646816	0.210775	0.0876321	-0.292784	0.579393	0.0505213	0.0668167	0.125525	0.00838476	-0.0186998	-0.0770396	-0.126571	0.00171982	0.189534	0.750142	-0.835975	0.0480027	0.0774499	-0.36997	0.178701	0.0689469	0.364208	-0.00127785
956	Steffi Oesterreich (Matthew Sikora)	02_Steffi_Oesterreich__Matthew_Sikora_			sample	Steffi_ Oesterreich__Matthew_Sikora_11	MM134_E2_B	Human Cell Line	-0.00804117	-0.11281	-0.0205368	-0.0114164	-0.100024	0.817804	0.0113241	0.0138218	0.0207524	-0.00851562	-0.0750558	-0.354913	-0.018188	-0.0329616	0.0322638	0.408446	-0.479627	-0.159381	0.732957	0.34984	0.0607361	-0.262448	0.600894	-0.0140775	0.0428011	0.0368934	-0.0784602	0.147406	-0.114436	-0.0398457	-0.00237578	0.155067	0.797155	-0.879511	0.0343321	0.0616525	-0.29869	0.141804	0.0275404	0.445018	-0.0461646
957	Steffi Oesterreich (Matthew Sikora)	02_Steffi_Oesterreich__Matthew_Sikora_			sample	Steffi_ Oesterreich__Matthew_Sikora_12	MM134_E2_C	Human Cell Line	-0.0606352	-0.0938487	0.0582313	-0.133179	-0.0198037	0.833227	-0.0290349	0.0265883	-0.0589365	0.0987441	-0.0547918	-0.229945	0.0720026	-0.133621	0.0273465	0.416379	-0.499926	-0.100167	0.615607	0.242568	0.00845134	-0.287022	0.618166	-0.00471231	0.0703146	0.0033481	-0.0339561	0.0972067	-0.111013	-0.0734928	-0.0114439	0.181337	0.72344	-0.904083	0.0567439	0.0856528	-0.242287	0.169593	0.114431	0.470151	-0.0132164
958	Steffi Oesterreich (Matthew Sikora)	02_Steffi_Oesterreich__Matthew_Sikora_			sample	Steffi_ Oesterreich__Matthew_Sikora_13	MM134_E2_siSCR_A	Human Cell Line	0.0166435	0.0125526	0.0486682	0.0111978	-0.0671906	0.912922	0.0286488	0.0649562	0.152725	0.247907	-0.00667258	-0.269774	-0.00330972	-0.0925291	-0.0355834	0.483398	-0.369625	-0.0934768	0.553474	0.234478	-0.0689639	-0.258901	0.521266	-0.0572537	0.0292415	-0.0243383	-0.00163361	0.0273298	-0.132426	-0.146769	-0.0092421	0.126636	0.649339	-0.881001	0.0551065	0.139139	-0.0703057	0.191707	0.0915234	0.424873	-0.11596
959	Steffi Oesterreich (Matthew Sikora)	02_Steffi_Oesterreich__Matthew_Sikora_			sample	Steffi_ Oesterreich__Matthew_Sikora_14	MM134_E2_siSCR_B	Human Cell Line	-0.0485052	0.107451	0.0357431	0.0955184	0.0540099	1.02658	0.0221472	-0.0160575	0.0785179	0.38515	0.0954817	-0.235702	0.00849199	-0.129347	-0.0281898	0.49031	-0.285847	-0.0116155	0.543138	0.339133	-0.129902	-0.27986	0.461053	-0.0646651	0.00870189	0.0105309	-0.0229304	0.0314259	-0.126142	-0.203824	-0.0284675	0.0650812	0.534998	-0.885251	0.045251	0.121508	0.133149	0.182828	0.0949316	0.56352	-0.0968635
960	Steffi Oesterreich (Matthew Sikora)	02_Steffi_Oesterreich__Matthew_Sikora_			sample	Steffi_ Oesterreich__Matthew_Sikora_15	MM134_E2_siSCR_C	Human Cell Line	-0.0350335	0.139103	0.00153438	-0.0111978	0.0397471	0.978054	0.0936465	0.0297092	0.129776	0.529997	0.0450175	-0.225517	-0.0711155	-0.238945	0.00134672	0.52083	-0.414582	-0.0763149	0.466579	0.342083	-0.171132	-0.215647	0.486694	-0.207593	0.180966	0.0490276	-0.117796	0.0718174	-0.264888	-0.194707	-0.0109678	0.0573757	0.487009	-0.847585	0.11111	0.087886	0.292573	0.22904	0.101209	0.573191	-0.173008
978	Steffi Oesterreich (Matthew Sikora)	02_Steffi_Oesterreich__Matthew_Sikora_			sample	Steffi_ Oesterreich__Matthew_Sikora_16	MM134_E2_siW4_A	Human Cell Line	0.0931962	-0.109136	0.068786	-0.234858	-0.210079	0.803227	-0.162939	0.0612315	0.00971642	0.00402565	-0.041749	-0.238686	0.0398013	-0.0848862	0.0215856	0.300789	-0.445952	-0.109775	0.406923	-0.0954694	0.0435505	-0.303307	0.661039	0.0093662	0.115808	0.165331	0.0605875	-0.157456	-0.317956	-0.00300006	-0.0321265	0.216186	0.787027	-0.80867	0.018989	0.101434	-0.255483	0.106678	0.0346034	0.477321	-0.0302859
979	Steffi Oesterreich (Matthew Sikora)	02_Steffi_Oesterreich__Matthew_Sikora_			sample	Steffi_ Oesterreich__Matthew_Sikora_17	MM134_E2_siW4_B	Human Cell Line	0.0434753	-0.15214	-0.00469658	-0.276696	-0.24834	0.889697	-0.238161	0.0430127	0.0158174	8.34638e-05	-0.0982854	-0.347098	0.0139792	-0.0964739	0.0748135	0.45983	-0.443035	-0.163713	0.387198	0.0330768	0.0011606	-0.32006	0.596477	0.040403	0.0870533	0.115242	0.0992208	-0.0836073	-0.236512	-0.258828	-0.0100963	0.178653	0.843278	-0.897942	0.0894126	0.1965	-0.347835	0.222859	0.0317132	0.46968	0.0135568
980	Steffi Oesterreich (Matthew Sikora)	02_Steffi_Oesterreich__Matthew_Sikora_			sample	Steffi_ Oesterreich__Matthew_Sikora_18	MM134_E2_siW4_C	Human Cell Line	0.0116861	-0.0525426	-0.00153438	-0.298186	-0.352136	0.867303	-0.221247	-0.00899805	-0.0937865	-8.34638e-05	-0.117305	-0.296784	0.0396327	-0.0414346	0.0577096	0.295256	-0.386633	-0.127204	0.38969	0.0339586	0.00271599	-0.245154	0.62416	0.0513967	0.117885	0.0689983	0.0911445	-0.0263124	-0.245866	-0.0312429	-0.023844	0.174577	0.760315	-0.828476	0.0447197	0.177495	-0.291708	0.169313	0.0029662	0.470113	0.0061754
981	Steffi Oesterreich (Matthew Sikora)	02_Steffi_Oesterreich__Matthew_Sikora_			sample	Steffi_ Oesterreich__Matthew_Sikora_19	44PE_Ctrl_A	Human Cell Line	-0.0229869	0.0987444	-0.0193796	0.466946	-0.291194	-0.4109	-0.0332841	-0.722882	-0.0755164	-0.0339966	-0.0608797	0.268024	0.0958314	0.0321774	-0.119228	-0.457933	0.574206	0.533324	-0.435108	-0.181281	-0.0200761	0.246132	-0.248123	0.13701	0.0837841	-0.21369	-0.00814578	0.0937886	0.237878	0.136195	0.10698	0.0233802	-0.404068	0.0866221	0.0418555	0.0833259	-0.0433864	-0.107155	0.0729002	0.424712	0.050639
982	Steffi Oesterreich (Matthew Sikora)	02_Steffi_Oesterreich__Matthew_Sikora_			sample	Steffi_ Oesterreich__Matthew_Sikora_20	44PE_Ctrl_B	Human Cell Line	-0.0199195	0.13754	0.0103708	0.443889	-0.437615	-0.387018	-0.031539	-0.715586	-0.176698	0.0378571	-0.0484365	0.298829	0.085192	0.0167879	-0.153404	-0.458637	0.694999	0.533543	-0.41595	-0.241416	-0.0293505	0.168623	-0.274928	0.0914557	0.104111	-0.248966	-0.0734584	0.238379	0.178469	0.218279	0.0688108	-0.0298562	-0.353098	0.13104	0.00470135	0.0641378	0.176325	-0.135684	0.057459	0.484704	0.0225734
983	Steffi Oesterreich (Matthew Sikora)	02_Steffi_Oesterreich__Matthew_Sikora_			sample	Steffi_ Oesterreich__Matthew_Sikora_21	44PE_Ctrl_C	Human Cell Line	-0.0456572	0.235089	0.0180894	0.528315	-0.259278	-0.289519	-0.0336337	-0.698328	-0.228378	0.143558	0.0997702	0.286921	-0.0265533	-0.0314899	-0.151912	-0.432887	0.640667	0.631504	-0.427115	-0.0127677	-0.0546781	0.155997	-0.273267	0.0303137	0.103279	-0.288864	-0.138689	0.0791077	0.128902	0.0777084	0.0729292	-0.0380975	-0.468646	0.0362006	0.00319646	0.104436	0.323993	-0.146521	0.0778928	0.503767	-0.00598331
984	Steffi Oesterreich (Matthew Sikora)	02_Steffi_Oesterreich__Matthew_Sikora_			sample	Steffi_ Oesterreich__Matthew_Sikora_22	44PE_E2_A	Human Cell Line	-0.109453	0.29038	-0.134332	0.63004	0.203902	-0.290399	0.000470166	-0.649545	-0.382682	0.32547	0.201997	0.248216	-0.0779749	-0.0678854	-0.209181	-0.399703	0.806499	0.475635	0.0650211	-0.105309	-0.0943451	0.257987	-0.154298	-0.000765747	0.209752	-0.177294	0.0279891	0.153884	0.000299714	0.113853	0.0515033	-0.0590737	-0.345175	0.0143731	-0.0310999	0.0676665	0.393904	-0.200436	0.0451422	0.687532	-0.111807
996	Steffi Oesterreich (Matthew Sikora)	02_Steffi_Oesterreich__Matthew_Sikora_			sample	Steffi_ Oesterreich__Matthew_Sikora_23	44PE_E2_B	Human Cell Line	0.164802	-0.00929239	-0.0252658	0.588213	0.127639	-0.337962	-0.000470166	-0.961255	-0.388845	-0.178415	0.132906	0.22166	0.235104	0.0640313	-0.270791	-0.477814	0.691734	0.496021	0.158258	-0.224989	0.0422687	0.18064	-0.171075	0.135381	0.0791918	-0.0672094	0.11516	0.161128	0.119005	0.165525	-0.0221887	-0.0394798	-0.411426	0.18462	-0.135513	-0.19933	0.032815	-0.276654	0.0616227	0.496811	0.078253
997	Steffi Oesterreich (Matthew Sikora)	02_Steffi_Oesterreich__Matthew_Sikora_			sample	Steffi_ Oesterreich__Matthew_Sikora_24	44PE_E2_C	Human Cell Line	0.0838869	-0.0363077	-0.0942034	0.692948	0.221068	-0.340118	-0.0609816	-0.874875	-0.326899	-0.151434	0.0565977	0.310474	0.00330972	0.0838096	-0.175135	-0.393864	0.622872	0.474932	0.109781	-0.308351	0.0457139	0.163733	-0.222363	0.125583	-0.0656609	-0.0393364	0.127178	0.0749385	0.202365	0.049603	0.0481972	0.00471667	-0.432857	0.0201804	-0.0506383	0.0354717	-0.287131	-0.114969	0.0420003	0.418351	0.0571807
998	Steffi Oesterreich (Matthew Sikora)	02_Steffi_Oesterreich__Matthew_Sikora_			sample	Steffi_ Oesterreich__Matthew_Sikora_25	44PE_E2_siSCR_A	Human Cell Line	0.109744	0.0371484	-0.0709882	0.666652	0.352383	-0.392146	0.0250286	-0.843957	-0.157212	-0.2122	0.132913	0.36836	0.0571298	0.0675523	-0.253885	-0.518673	0.71769	0.455098	0.124988	-0.229047	0.0383895	0.229595	-0.316707	0.11382	-0.00843748	-0.0550706	0.125751	0.148193	0.226333	0.0585345	-0.00171982	-0.0453471	-0.38761	0.085839	-0.0524188	-0.0190296	0.0155854	-0.13194	0.0986283	0.383645	-0.00425751
999	Steffi Oesterreich (Matthew Sikora)	02_Steffi_Oesterreich__Matthew_Sikora_			sample	Steffi_ Oesterreich__Matthew_Sikora_26	44PE_E2_siSCR_B	Human Cell Line	0.126873	0.00582632	-0.072154	0.632087	0.183466	-0.468182	0.0672243	-0.838155	-0.182279	-0.137987	0.190118	0.234069	0.0332511	0.0358395	-0.163281	-0.326148	0.738404	0.41715	0.0616155	-0.0831635	0.0103487	0.194726	-0.298642	0.126777	-0.00347671	-0.0291914	0.149371	0.140453	0.27494	0.00784191	0.0290887	-0.0163868	-0.4049	0.0516171	-0.00957354	0.149635	-0.132345	-0.15391	0.00403983	0.402158	0.00127785
1000	Steffi Oesterreich (Matthew Sikora)	02_Steffi_Oesterreich__Matthew_Sikora_			sample	Steffi_ Oesterreich__Matthew_Sikora_27	44PE_E2_siSCR_C	Human Cell Line	0.1537	0.0637999	-0.100771	0.530823	0.0928352	-0.401688	0.065111	-0.875393	-0.318033	-0.113905	0.145784	0.289608	0.0286986	0.0769596	-0.222807	-0.570491	0.787645	0.404894	0.0805856	0.0127677	0.0400517	0.175668	-0.260597	0.133648	0.0970144	-0.0657152	0.127756	0.349559	0.172722	0.0705699	0.0205531	-0.00471667	-0.421199	0.15285	-0.0639748	0.00759054	-0.0155854	-0.184382	0.03062	0.331416	0.0149281
1001	Steffi Oesterreich (Matthew Sikora)	02_Steffi_Oesterreich__Matthew_Sikora_			sample	Steffi_ Oesterreich__Matthew_Sikora_28	44PE_E2_siW4_A	Human Cell Line	0.0762308	-0.00651036	-0.136114	0.567967	0.121792	-0.47429	-0.0731671	-0.947657	-0.187022	-0.151809	-0.0518361	0.245893	-0.00979092	0.0639252	-0.1714	-0.253452	0.641148	0.428307	-0.201404	-0.330322	0.0531904	0.194345	-0.219749	0.149036	-0.0562252	-0.0739568	0.182951	0.0744689	0.256502	0.0583821	0.0705677	0.00909475	-0.494909	-0.0545974	0.000349761	-0.00190832	-0.131399	-0.0975764	-0.0261813	0.405488	0.0358502
1002	Steffi Oesterreich (Matthew Sikora)	02_Steffi_Oesterreich__Matthew_Sikora_			sample	Steffi_ Oesterreich__Matthew_Sikora_29	44PE_E2_siW4_B	Human Cell Line	0.0691855	0.0053882	-0.0728451	0.529304	0.0888243	-0.363289	-0.0446009	-0.85122	-0.26405	-0.148986	0.095032	0.271669	-0.0341321	-0.00153747	-0.193508	-0.297985	0.725624	0.476579	-0.0896424	-0.160671	0.0403476	0.230996	-0.250574	0.0801114	-0.0217856	-0.0863052	0.129107	0.128468	0.150098	0.200952	0.0801638	-0.0487075	-0.285874	-0.0143731	-0.046645	-0.0623246	-0.0471572	-0.189498	0.0451064	0.462453	0.00788542
1003	Steffi Oesterreich (Matthew Sikora)	02_Steffi_Oesterreich__Matthew_Sikora_			sample	Steffi_ Oesterreich__Matthew_Sikora_30	44PE_E2_siW4_C	Human Cell Line	0.0303291	-0.0134898	-0.0526355	0.541145	0.208842	-0.382538	-0.0511288	-0.782394	-0.290401	-0.105024	-0.000830153	0.168633	-0.0619033	0.0760495	-0.135647	-0.275826	0.664733	0.435737	-0.0616155	-0.176629	0.0165548	0.242922	-0.237111	0.11883	0.0143479	-0.112574	0.1735	-0.00853882	0.237048	-0.0520163	0.0538504	-0.0152793	-0.287159	-0.0763864	-0.0408735	-0.033406	-0.115495	-0.208231	-0.0183926	0.392705	0.0479572
1004	Steffi Oesterreich (Matthew Sikora)	02_Steffi_Oesterreich__Matthew_Sikora_			sample	Steffi_ Oesterreich__Matthew_Sikora_31	134_L_E_Ctrl_A	Human Cell Line	-0.091905	-0.163655	-0.253453	-0.27494	0.0115287	0.48424	-0.169413	0.623287	0.53111	0.0169915	-0.0201887	-0.437944	-0.0322729	0.119403	0.489195	-0.012038	-0.0322417	-0.119846	-0.846422	0.144556	0.121593	0.011971	0.333597	-0.0115447	-0.216287	0.122568	-0.178349	0.079513	0.0175525	0.0154317	-0.0474722	-0.054943	-0.0156816	0.568428	-0.0725046	-0.057435	-0.0911074	0.0409757	-0.206808	-1.98794	0.00950703
1005	Steffi Oesterreich (Matthew Sikora)	02_Steffi_Oesterreich__Matthew_Sikora_			sample	Steffi_ Oesterreich__Matthew_Sikora_32	134_L_E_Ctrl_B	Human Cell Line	-0.166425	-0.122649	-0.109147	-0.200842	0.189391	0.345415	-0.215812	0.58662	0.536678	0.149695	0.000837132	-0.502547	-0.0236734	0.0278051	0.436541	-0.037052	-0.00289566	-0.145785	-0.906997	0.187235	0.115004	-0.0499193	0.323426	-0.0322786	-0.215046	0.0573493	-0.231266	-0.171511	-0.000299714	-0.136889	-0.0199136	-0.0525787	0.0141913	0.543044	-0.0867778	-0.0496691	-0.0669544	0.0489207	-0.146551	-1.85862	0.0359444
1006	Steffi Oesterreich (Matthew Sikora)	02_Steffi_Oesterreich__Matthew_Sikora_			sample	Steffi_ Oesterreich__Matthew_Sikora_33	134_L_E_Ctrl_C	Human Cell Line	-0.1966	-0.068097	-0.0722171	-0.298394	-0.0115287	0.355625	-0.230167	0.515205	0.480976	0.197593	0.000830153	-0.390438	0.0289746	0.0177156	0.354536	-0.0476417	0.0579191	-0.0376914	-0.918951	0.0535961	0.0879781	-0.03587	0.314874	-0.0939834	-0.228433	0.0361869	-0.282263	-0.0204727	-0.00403585	-0.0582281	-0.00922283	-0.033903	-0.0735226	0.542791	-0.0654031	-0.0637791	0.10588	0.0199092	-0.214244	-1.74427	-0.055979
1007	Steffi Oesterreich (Matthew Sikora)	02_Steffi_Oesterreich__Matthew_Sikora_			sample	Steffi_ Oesterreich__Matthew_Sikora_34	134_L_E_siSCR_A	Human Cell Line	-0.219502	0.061807	-0.0823548	-0.301246	0.0566487	0.362775	-0.157738	0.490587	0.604091	0.318433	0.0745308	-0.625068	-0.158803	-0.0307411	0.270538	0.012038	0.00935954	0.000505714	-1.05074	0.14594	-0.11565	0.0176242	0.119342	-0.174847	-0.259871	-0.0033481	-0.218513	-0.196065	0.0944926	-0.319346	-0.0588038	-0.134213	-0.184887	0.532575	-0.0916057	-0.0996891	0.335979	0.00044989	-0.179054	-1.72703	0.0224207
1008	Steffi Oesterreich (Matthew Sikora)	02_Steffi_Oesterreich__Matthew_Sikora_			sample	Steffi_ Oesterreich__Matthew_Sikora_35	134_L_E_siSCR_B	Human Cell Line	-0.209289	0.133672	-0.12317	-0.259897	0.119844	0.488344	-0.0715477	0.676439	0.645955	0.482646	0.113597	-0.50051	-0.160662	-0.0466949	0.32219	0.0255609	0.102727	-0.0385195	-1.06995	0.148517	-0.0699125	0.069782	0.174112	-0.258335	-0.219886	0.0557306	-0.264358	-0.159908	-0.0126941	-0.226312	-0.0302305	-0.135107	-0.106753	0.560431	-0.0934321	-0.148336	0.418644	0.0206719	-0.156848	-1.75471	-0.127924
1019	Steffi Oesterreich (Matthew Sikora)	02_Steffi_Oesterreich__Matthew_Sikora_			sample	Steffi_ Oesterreich__Matthew_Sikora_36	134_L_E_siSCR_C	Human Cell Line	0.00804117	-0.157605	-0.162227	-0.197725	-0.045632	0.28939	-0.0104388	0.484106	0.694084	-0.0103897	-0.0510522	-0.582824	-0.110693	0.0669563	0.376765	0.0818464	-0.115574	-0.0814038	-1.00431	-0.040376	0.0799837	0.058079	0.128652	-0.00230731	-0.249757	0.224952	-0.133624	-0.228758	0.269057	-0.648123	-0.119114	-0.0811391	-0.0598314	0.744475	-0.0660628	-0.179872	-0.0521019	-0.00044989	-0.191863	-2.19608	0.0585616
1020	Steffi Oesterreich (Matthew Sikora)	02_Steffi_Oesterreich__Matthew_Sikora_			sample	Steffi_ Oesterreich__Matthew_Sikora_37	134_L_E_siW4_A	Human Cell Line	0.0816715	-0.189688	-0.0903413	-0.320846	-0.16881	0.174568	-0.439197	0.520911	0.324013	-0.0832349	-0.0403567	-0.567127	0.0109214	0.0378159	0.345436	-0.0857909	0.0420585	-0.0292096	-1.08185	-0.372159	0.205988	-0.0603092	0.275034	-0.0418482	-0.213467	0.264448	-0.107807	-0.0430312	0.183417	-0.0783839	-0.0922174	-0.0594623	0.0425717	0.755657	-0.124148	-0.177324	0.0899056	-0.042129	-0.242565	-2.21428	0.0272682
1021	Steffi Oesterreich (Matthew Sikora)	02_Steffi_Oesterreich__Matthew_Sikora_			sample	Steffi_ Oesterreich__Matthew_Sikora_38	134_L_E_siW4_B	Human Cell Line	-0.0134928	-0.176297	-0.122307	-0.236813	-0.136674	0.230762	-0.395701	0.435301	0.438742	-0.0712173	-0.0971967	-0.491515	-0.00777132	0.0671483	0.362126	-0.0594163	0.00289566	-0.063066	-1.02547	-0.328238	0.160353	-0.0589216	0.255071	-0.0223746	-0.18072	0.285738	-0.0623209	-0.295465	0.132656	-0.415156	-0.0916431	-0.0281753	0.0185541	0.770957	-0.0659468	-0.097757	-0.0969205	0.0407122	-0.353181	-2.19051	0.0763882
1022	Steffi Oesterreich (Matthew Sikora)	02_Steffi_Oesterreich__Matthew_Sikora_			sample	Steffi_ Oesterreich__Matthew_Sikora_39	134_L_E_siW4_C	Human Cell Line	0.117881	-0.17178	-0.137368	-0.271601	-0.186123	0.267967	-0.438816	0.478319	0.396468	-0.0703605	-0.0773575	-0.428939	0.00430923	0.0658704	0.257321	-0.151349	0.0285805	-0.000505714	-1.05271	-0.312859	0.139816	-0.059081	0.32844	-0.0268587	-0.202231	0.289679	-0.118952	-0.17343	0.13371	-0.155683	-0.0828617	-0.0677681	0.00218908	0.739266	-0.156535	-0.143448	0.0418662	-0.00442578	-0.209232	-2.2254	0.012105
1023	Steffi Oesterreich (Matthew Sikora)	02_Steffi_Oesterreich__Matthew_Sikora_			sample	Steffi_ Oesterreich__Matthew_Sikora_40	44_L_A_Ctrl_A	Human Cell Line	0.132781	-0.0625197	0.0268523	1.07667	0.886932	-0.116341	0.216335	-0.811276	0.0412552	-0.029362	-0.118138	0.0786442	0.020021	0.0903863	0.0627539	0.103392	-0.089535	0.157813	-0.711501	-0.380562	0.0246774	-0.011971	-0.0161427	0.15274	0.0375856	0.0784616	0.351424	0.0813715	-0.108336	0.170805	0.0608387	0.125022	0.0327709	-0.598927	-0.0408448	0.164584	0.102049	-0.120681	-0.0274432	-0.556258	-0.0470037
1024	Steffi Oesterreich (Matthew Sikora)	02_Steffi_Oesterreich__Matthew_Sikora_			sample	Steffi_ Oesterreich__Matthew_Sikora_41	44_L_A_Ctrl_B	Human Cell Line	0.203284	-0.0741544	0.0419832	1.15373	0.954164	0.0618324	0.164896	-0.70299	0.0586192	-0.00184064	0.109584	0.157631	-0.0703803	0.0781905	0.000926481	0.160722	-0.00828834	0.252198	-0.748271	0.270343	0.0521518	0.158232	0.0360714	0.156661	0.0220581	0.0207694	0.36642	0.212811	-0.176777	0.242477	0.0333993	0.0999659	0.0691641	-0.624888	-0.0291024	0.0105552	0.172355	-0.18129	-0.0573124	-0.702224	-0.065708
1025	Steffi Oesterreich (Matthew Sikora)	02_Steffi_Oesterreich__Matthew_Sikora_			sample	Steffi_ Oesterreich__Matthew_Sikora_42	44_L_A_Ctrl_C	Human Cell Line	0.16006	-0.120098	0.0422328	0.998521	0.889168	0.0699956	0.204198	-0.760347	-0.00386141	-0.0208978	0.0410388	0.0764095	-0.123034	0.00153747	0.0592858	0.0719589	-0.144003	0.176771	-0.730079	0.337905	-0.00518342	0.228503	0.037261	0.0656468	0.0754663	0.0664182	0.490371	-0.24213	-0.156891	-0.0548431	0.0167725	0.0793507	0.0345228	-0.62347	-0.0580329	0.111881	0.0475653	-0.167904	-0.152108	-0.62219	-0.107228
1026	Steffi Oesterreich (Matthew Sikora)	02_Steffi_Oesterreich__Matthew_Sikora_			sample	Steffi_ Oesterreich__Matthew_Sikora_43	44_L_A_siSCR_A	Human Cell Line	0.148567	-0.043906	0.0306833	0.834798	0.857238	-0.0587198	0.199424	-0.731987	0.165522	0.00641715	-0.0245509	0.0150263	-0.0983121	0.0578194	-0.019651	0.171181	-0.0679331	0.223426	-0.613979	0.207155	-0.0011606	0.17089	-0.104941	0.118239	-0.0546041	0.100345	0.440002	-0.0689431	-0.15152	0.0511927	0.054499	0.0838213	0.0556536	-0.544041	-0.0289494	-0.0862437	0.169197	-0.185492	0.0139147	-0.652161	0.0664309
1027	Steffi Oesterreich (Matthew Sikora)	02_Steffi_Oesterreich__Matthew_Sikora_			sample	Steffi_ Oesterreich__Matthew_Sikora_44	44_L_A_siSCR_B	Human Cell Line	0.0271854	-0.0630837	0.0116682	0.861658	0.846076	-0.0396455	0.265671	-0.733218	0.285397	-0.0202994	0.00258305	-0.0285244	-0.0877528	0.106916	0.0768513	0.335458	-0.30631	0.0839242	-0.527094	0.289831	-0.0418244	0.230232	-0.080391	0.136575	0.00347671	0.0288217	0.43889	-0.00294264	-0.203049	-0.202297	0.0237212	0.0733333	0.172149	-0.708825	0.071117	-0.0272118	0.0924211	-0.178892	-0.0117157	-0.74751	-0.0478538
1028	Steffi Oesterreich (Matthew Sikora)	02_Steffi_Oesterreich__Matthew_Sikora_			sample	Steffi_ Oesterreich__Matthew_Sikora_45	44_L_A_siSCR_C	Human Cell Line	0.0309635	-0.0053882	0.036943	0.844138	0.859266	0.0296819	0.156389	-0.732292	0.239276	0.00455664	-0.0423013	-0.0150263	0.0263098	0.0836255	0.051165	0.197243	-0.14025	0.175768	-0.559314	0.241094	-0.0464821	0.179679	-0.111874	0.094336	-0.0457318	-0.0250229	0.392432	0.0917169	-0.242878	0.00300006	0.0381231	0.103885	0.147051	-0.636375	0.0525627	-0.0235458	0.182667	-0.164388	0.00613688	-0.70943	-0.077035
1029	Steffi Oesterreich (Matthew Sikora)	02_Steffi_Oesterreich__Matthew_Sikora_			sample	Steffi_ Oesterreich__Matthew_Sikora_46	44_L_A_siW4_A	Human Cell Line	-0.0309027	0.0208026	0.0531127	0.671053	0.659932	-0.124512	0.0255688	-0.733924	0.196794	0.126182	-0.218096	0.085143	-0.132848	0.01939	-0.0162943	0.0728239	0.0188748	0.247148	-0.785222	-0.0420222	-0.122005	0.0677037	0.0161427	0.0553242	-0.0215763	-0.094234	0.372411	-0.170054	-0.152276	-0.0125446	0.0475932	0.0357119	0.0538408	-0.682547	-0.0337917	-0.0644932	0.231844	-0.276543	-0.0694166	-0.513951	-0.0998032
1030	Steffi Oesterreich (Matthew Sikora)	02_Steffi_Oesterreich__Matthew_Sikora_			sample	Steffi_ Oesterreich__Matthew_Sikora_47	44_L_A_siW4_B	Human Cell Line	-0.0186583	0.0399921	0.106967	0.763509	0.594559	-0.0304793	-0.0451554	-0.64389	0.263936	0.244153	-0.116943	0.0821853	-0.057343	0.042731	0.0308163	0.24539	0.0656766	0.251139	-0.834018	0.047045	-0.116729	0.0984922	-0.0196465	0.0499474	-0.0608704	-0.153312	0.309973	-0.0655373	-0.169993	0.114186	0.0452034	0.125686	0.0663886	-0.754238	0.0353162	0.0225543	0.322802	-0.231649	-0.0884735	-0.484113	-0.0990608
1031	Steffi Oesterreich (Matthew Sikora)	02_Steffi_Oesterreich__Matthew_Sikora_			sample	Steffi_ Oesterreich__Matthew_Sikora_48	44_L_A_siW4_C	Human Cell Line	-0.0333116	0.136638	0.105898	0.722247	0.560398	-0.0296819	-0.0227175	-0.737544	0.204266	0.344662	-0.095708	-0.0427603	-0.177377	-0.0287909	-0.0332715	0.132034	0.0579495	0.291017	-0.841698	0.194804	-0.142282	0.0286395	-0.032611	-0.00873379	0.0178513	-0.137432	0.267927	0.00294264	-0.230305	0.0699481	0.00698732	0.0558016	-0.00218908	-0.713874	-0.0230547	0.00190832	0.475756	-0.313094	-0.121006	-0.298243	-0.0656986
[truncated: 264 more columns]
