# Supplementary material for: Estrogen Regulation of mTOR Signaling and Mitochondrial Function in Invasive Lobular Carcinoma Cell Lines Requires WNT4
Source: Cancers (Basel). 2020 Oct 12;12(10):2931. doi: 10.3390/cancers12102931 (PMC7650584; doi:10.3390/cancers12102931)
Supplement: Supplementary file 1 [file cancers-12-02931-s001.zip › Supplemental Table 1 - TCGA RPPA WNT4 assoc.xlsx]

## Sheet: Sheet1
OVARIAN CANCER	Cytoband	Mean, WNT4 high	Mean, WNT4 low	SD, WNT4 high	SD, WNT4 low	Log Ratio, high vs low	p-Value	q-Value	Higher expression in			LUNG ADENO	Cytoband	Mean, WNT4 high	Mean, WNT4 low	SD, WNT4 high	SD, WNT4 low	Log Ratio, high vs low	p-Value	q-Value	Higher expression in			RENAL CLEAR CELL	Cytoband	Mean, WNT4 high	Mean, WNT4 low	SD, WNT4 high	SD, WNT4 low	Log Ratio, high vs low	p-Value	q-Value	Higher expression in
GSK3A_PS9	8p11.1	0.45	-0.05	0.3	0.64	0.5	9.83e-10	1.02e-07	WNT4-high			PRKCA_PS657	17q22-q23.2	-0.27	0.1	0.39	0.51	-0.37	2.59e-09	5.36e-07	WNT4-low			RAB11A	15q22.31	-0.26	0.04	0.24	0.4	-0.3	4.24e-11	4.38e-09	WNT4-low
GSK3B_PS9	8p11.1	0.45	-0.05	0.3	0.64	0.5	9.83e-10	1.02e-07	WNT4-high			KIT	4q12	0.79	0.11	0.87	0.72	0.68	6.28e-08	6.503e-06	WNT4-high			RAB11B	19p13.2	-0.26	0.04	0.24	0.4	-0.3	4.24e-11	4.38e-09	WNT4-low
TSC2_PT1462	1q21	0.33	-0.01	0.25	0.36	0.34	1.02e-07	7.049e-06	WNT4-high			CLDN7	17p13.1	0.89	0.04	1.14	0.8	0.85	1.83e-07	1.26e-05	WNT4-high			TSC2_PT1462	16p13.3	-0.25	0.04	0.31	0.36	-0.28	1.17e-07	6.984e-06	WNT4-low
GSK3A_PS21_S9	5q21-q22	0.38	-0.01	0.31	0.62	0.39	7.64e-07	3.163e-05	WNT4-high			IGFBP2	2q35	1.03	0.21	1.12	1.11	0.82	5.15e-07	2.663e-05	WNT4-high			FOXO3_PS318_S321	6q21	0.17	0	0.19	0.2	0.17	1.57e-07	6.984e-06	WNT4-high
GSK3B_PS21_S9	5q21-q22	0.38	-0.01	0.31	0.62	0.39	7.64e-07	3.163e-05	WNT4-high			PRKCA	17q24.2	-0.14	0.08	0.31	0.43	-0.22	5.089e-06	0.0001971	WNT4-low			YBX1	1p34.2	0.24	-0.11	0.38	0.42	0.35	1.69e-07	6.984e-06	WNT4-high
CASP7	10q25.3	-0.22	0.19	0.34	0.75	-0.4	2.078e-06	7.168e-05	WNT4-low			ANXA1	9q21.13	-0.2	0.18	0.55	0.75	-0.38	5.714e-06	0.0001971	WNT4-low			CDKN1A	6p21.2	0.19	0	0.22	0.27	0.18	1.235e-06	4.26e-05	WNT4-high
RPS6KA1_PT359_S363	5q21-q22	0.2	-0.01	0.22	0.34	0.21	5.307e-05	0.001569	WNT4-high			PDCD4	10q25.2	0.38	-0.09	0.74	0.63	0.47	7.816e-06	0.0002311	WNT4-high			ERBB3	12q13.2	-0.5	0.07	0.69	0.78	-0.56	1.443e-06	4.268e-05	WNT4-low
SMAD1	4q31.21	-0.11	0.1	0.23	0.35	-0.21	0.0001236	0.003198	WNT4-low			FASN	17q25.3	0.5	-0.04	0.92	0.65	0.55	2.103e-05	0.0005442	WNT4-high			NRG1	8p12	-0.07	0.08	0.19	0.31	-0.15	3.762e-06	9.735e-05	WNT4-low
CCNE1	19q12	-0.34	0.08	0.5	0.74	-0.42	0.0002428	0.005584	WNT4-low			PRKAA1_PT172	5p12	-0.24	0.08	0.53	0.57	-0.32	3.305e-05	0.0007601	WNT4-low			PRKAA1	5p13.1	-0.2	0.08	0.38	0.37	-0.29	6.129e-06	0.0001343	WNT4-low
AKT1_PS473	8p11.1	0.56	0.07	0.61	0.7	0.5	0.0003477	0.005998	WNT4-high			PRKAA1	5p13.1	0.16	0	0.3	0.24	0.17	7.472e-05	0.001547	WNT4-high			SHC1_PY317	1q21	-0.24	0.03	0.37	0.39	-0.28	6.489e-06	0.0001343	WNT4-low
AKT2_PS473	8p11.1	0.56	0.07	0.61	0.7	0.5	0.0003477	0.005998	WNT4-high			PREX1	20q13.13	-0.08	0.04	0.22	0.27	-0.13	0.0001078	0.002029	WNT4-low			XBP1	22q12.1|22q12	0.2	-0.01	0.29	0.35	0.21	1.194e-05	0.0002246	WNT4-high
AKT3_PS473	8p11.1	0.56	0.07	0.61	0.7	0.5	0.0003477	0.005998	WNT4-high			TUBA1B	12q13.12	0.3	-0.14	0.76	0.97	0.44	0.0001191	0.002055	WNT4-high			SERPINE1	7q22.1	1.08	0.14	1.4	1.11	0.94	3.032e-05	0.0005231	WNT4-high
SYK	9q22.2	-0.43	0.09	0.65	0.73	-0.52	0.000379	0.006035	WNT4-low			CCNE1	19q12	-0.1	0.1	0.35	0.42	-0.2	0.0001621	0.002581	WNT4-low			PEA15	1q23.2	0.2	-0.02	0.36	0.35	0.23	8.77e-05	0.001299	WNT4-high
CASP8	2q33.1	-0.1	0.06	0.2	0.35	-0.16	0.0006982	0.0103	WNT4-low			ITGA2	5q11.2	-0.12	0.09	0.4	0.45	-0.21	0.0002496	0.003691	WNT4-low			TP53	17p13.1	0.14	-0.02	0.25	0.29	0.16	8.783e-05	0.001299	WNT4-high
JUN_PS73	17q21.31	0.28	-0.02	0.41	0.32	0.29	0.001045	0.0144	WNT4-high			CDH1	16q22.1	0.18	-0.17	0.67	0.75	0.35	0.0002996	0.004135	WNT4-high			IGFBP2	2q35	0.52	0.01	0.83	0.52	0.5	0.0001149	0.001586	WNT4-high
SQSTM1	5q35.3	-0.49	0.03	0.71	0.83	-0.51	0.001151	0.0149	WNT4-low			INPP4B	4q31.21	-0.15	0.14	0.53	0.73	-0.29	0.0003396	0.004394	WNT4-low			ESR1	6q25.1-q25.2	-0.04	0.16	0.31	0.45	-0.2	0.0001415	0.001708	WNT4-low
MAPK8_PT183	3q13.3	0.33	-0.01	0.49	0.42	0.34	0.001522	0.0185	WNT4-high			PEA15	1q23.2	-0.1	0.08	0.34	0.34	-0.17	0.0003924	0.004779	WNT4-low			RPS6KA1	1p36.11	-0.22	0.03	0.4	0.44	-0.25	0.0001418	0.001708	WNT4-low
RICTOR_PT1135	2q31.1	0.13	-0.02	0.23	0.23	0.15	0.002664	0.0306	WNT4-high			STAT5A	17q21.2	-0.23	0.05	0.56	0.68	-0.28	0.0007494	0.008618	WNT4-low			PECAM1	17q23.3	-0.07	0.07	0.22	0.27	-0.14	0.0001485	0.001708	WNT4-low
MTOR_PS2448	8p11.1	0.2	0.03	0.26	0.37	0.17	0.003216	0.035	WNT4-high			NKX2-1	14q13.3	0.27	-0.39	1.37	1.5	0.66	0.000811	0.008835	WNT4-high			NDRG1_PT346	8q24.3	-1.01	-0.1	1.52	1.32	-0.91	0.0001599	0.001742	WNT4-low
ERCC1	19q13.32	-0.13	0.02	0.23	0.24	-0.15	0.003428	0.0355	WNT4-low			TSC2_PT1462	16p13.3	0.11	-0.04	0.32	0.3	0.15	0.0009783	0.0101	WNT4-high			SRC_PY527	20q12-q13	-0.61	-0.08	0.88	0.75	-0.52	0.0001908	0.001975	WNT4-low
EIF4EBP1_PT37_T46	5q21-q22	0.22	0	0.34	0.53	0.22	0.003895	0.0366	WNT4-high			CTNNB1	3p22.1	0.13	-0.17	0.65	0.8	0.3	0.001663	0.0164	WNT4-high			CTNNB1	3p22.1	-0.38	0.01	0.67	0.49	-0.39	0.0002426	0.002392	WNT4-low
PRKAA1	5p13.1	-0.11	0.04	0.24	0.23	-0.15	0.003745	0.0366	WNT4-low			SQSTM1	5q35.3	-0.1	0.17	0.59	0.78	-0.27	0.002073	0.0195	WNT4-low			LCK	1p35.2	0.3	0.01	0.53	0.38	0.29	0.0004707	0.004428	WNT4-high
AKT1S1_PT246	17q23.1	0.17	-0.03	0.34	0.28	0.21	0.00429	0.0386	WNT4-high			AR	Xq12	0.14	0.01	0.31	0.24	0.13	0.002482	0.0223	WNT4-high			ACVRL1	12q13.13	-0.05	0.1	0.27	0.31	-0.15	0.0005172	0.004613	WNT4-low
CLDN7	17p13.1	-0.48	0.13	1	0.98	-0.6	0.004903	0.0423	WNT4-low			STK11	19p13.3	-0.06	0.03	0.22	0.19	-0.09	0.002796	0.0241	WNT4-low			RPTOR	17q25.3	0.27	-0.02	0.53	0.32	0.29	0.0005349	0.004613	WNT4-high
												EIF4EBP1	8p11.23	-0.08	0.12	0.48	0.49	-0.2	0.003156	0.0261	WNT4-low			EGFR_PY1068	7p12	-0.4	0.02	0.79	0.7	-0.42	0.0007572	0.00627	WNT4-low
												SETD2	3p21.31	0.04	0.24	0.39	0.82	-0.2	0.003824	0.0304	WNT4-low			FN1	2q35	0.39	0.07	0.6	0.68	0.32	0.0009084	0.007233	WNT4-high
												ERBB3	12q13.2	0.22	0.04	0.47	0.45	0.19	0.004128	0.0317	WNT4-high			ACACA	17q12	0.31	0.01	0.57	0.48	0.29	0.001075	0.007971	WNT4-high
												PARK7	1p36.23	0.1	-0.02	0.28	0.33	0.12	0.004499	0.0333	WNT4-high			SCD	10q24.31	-0.07	0.03	0.19	0.2	-0.1	0.001078	0.007971	WNT4-low
SITE SPECIFIC												CASP8	2q33.1	0	0.22	0.51	0.75	-0.22	0.004781	0.0341	WNT4-low			NFKB1_PS536	4q24	-0.36	0	0.71	0.74	-0.37	0.001152	0.008225	WNT4-low
SHARED ALL												RAD51	15q15.1	-0.08	0.02	0.25	0.3	-0.1	0.004998	0.0345	WNT4-low			BCL2L1	20q11.21	0.13	0	0.25	0.2	0.13	0.001287	0.008883	WNT4-high
												YWHAE	17p13.3	0.08	0.01	0.17	0.17	0.07	0.005306	0.0354	WNT4-high			TSC2	16p13.3	-0.31	-0.01	0.6	0.5	-0.3	0.001345	0.008983	WNT4-low
												RAB25	1q22	0.21	-0.04	0.68	0.51	0.25	0.005821	0.0377	WNT4-high			NRAS	1p13.2	-0.03	0.04	0.14	0.19	-0.07	0.001707	0.011	WNT4-low
												RPS6KB1	17q23.1	-0.11	-0.01	0.25	0.37	-0.1	0.00703	0.0441	WNT4-low			AR	Xq12	-0.17	0.05	0.47	0.41	-0.23	0.002008	0.0124	WNT4-low
																								INPP4B	4q31.21	0.14	-0.03	0.32	0.46	0.16	0.002043	0.0124	WNT4-high
																								MET_PY1235	7q31	0.11	0	0.23	0.19	0.11	0.002311	0.0134	WNT4-high
																								RPS6	9p22.1	0.23	-0.02	0.52	0.48	0.25	0.002324	0.0134	WNT4-high
																								GATA3	10p14	0.09	0	0.18	0.24	0.09	0.002552	0.0142	WNT4-high
																								G6PD	Xq28	0.34	0.04	0.64	0.54	0.3	0.002601	0.0142	WNT4-high
																								DVL3	3q27.1	0.11	-0.04	0.34	0.3	0.15	0.003046	0.0159	WNT4-high
																								BCL2	18q21.33	-0.24	0.03	0.6	0.57	-0.28	0.003068	0.0159	WNT4-low
																								CDKN1B_PT198	12p13.1-p12	0.1	-0.02	0.25	0.2	0.12	0.003157	0.0159	WNT4-high
																								CCNE1	19q12	0.13	0.02	0.24	0.23	0.11	0.003284	0.0162	WNT4-high
																								DIRAS3	1p31.3	-0.01	0.1	0.23	0.3	-0.11	0.003394	0.0162	WNT4-low
																								PRKAA1_PT172	5p12	-0.33	-0.01	0.69	0.6	-0.31	0.003438	0.0162	WNT4-low
																								RAD51	15q15.1	0.15	0	0.33	0.34	0.15	0.0039	0.0175	WNT4-high
																								ERCC1	19q13.32	0.12	0.04	0.18	0.17	0.08	0.004025	0.0175	WNT4-high
																								CDH3	16q22.1	0.21	-0.02	0.51	0.39	0.23	0.004025	0.0175	WNT4-high
																								EEF2	19p13.3	0.07	-0.05	0.26	0.24	0.12	0.004053	0.0175	WNT4-high
																								CCNB1	5q13.2	0.53	0.13	0.91	0.56	0.4	0.004139	0.0175	WNT4-high
																								BAX	19q13.33	0.14	-0.02	0.34	0.3	0.15	0.004312	0.0179	WNT4-high
																								MAPK1_PT202_Y204	22q11.21	-0.48	0	1.1	0.99	-0.48	0.00501	0.0199	WNT4-low
																								MAPK3_PT202_Y204	16p11.2	-0.48	0	1.1	0.99	-0.48	0.00501	0.0199	WNT4-low
																								RICTOR_PT1135	5p13.1	-0.08	-0.01	0.17	0.19	-0.07	0.005629	0.022	WNT4-low
																								SRC	20q11.23	0.18	0.03	0.34	0.27	0.14	0.006314	0.0242	WNT4-high
																								FOXO3	6q21	0.07	0	0.17	0.19	0.07	0.007503	0.0282	WNT4-high
																								ATM	11q22.3	-0.27	-0.01	0.62	0.54	-0.25	0.007693	0.0284	WNT4-low
																								GAB2	11q14.1	-0.21	0.11	0.77	0.9	-0.32	0.008099	0.0294	WNT4-low
																								ACACA_PS79	17q21	0.2	0.01	0.47	0.4	0.19	0.0101	0.0355	WNT4-high
																								ACACB_PS79	12q24.11	0.2	0.01	0.47	0.4	0.19	0.0101	0.0355	WNT4-high
																								BRAF	7q34	-0.16	0.02	0.47	0.48	-0.19	0.0105	0.0362	WNT4-low
																								PCNA	20p12.3	0.1	0.01	0.21	0.2	0.08	0.0119	0.0404	WNT4-high
																								AKT1S1_PT246	19q13.33	-0.09	0.13	0.56	0.53	-0.22	0.0124	0.0408	WNT4-low
																								ERRFI1	1p36.23	-0.13	0.08	0.52	0.59	-0.2	0.0125	0.0408	WNT4-low
																								MYH11	16p13.11	0.45	-0.22	1.72	1.69	0.67	0.0126	0.0408	WNT4-high
																								YBX1_PS102	1p34	0.27	0.04	0.6	0.5	0.23	0.0136	0.0428	WNT4-high
																								PDK1_PS241	2q31.1	-0.08	0.03	0.29	0.26	-0.11	0.0137	0.0428	WNT4-low
																								TIGAR	12p13.32	0.15	0.04	0.29	0.2	0.11	0.0148	0.0457	WNT4-high
